# Supplementary material for: Environmental controls on observed spatial variability of soil pore water geochemistry in small headwater catchments underlain with permafrost
Source: Copernicus journal article supplement (doi:10.5194/tc-17-3987-2023), 2023-09-14
Supplement: Supplementary file 1 [file tc-17-3987-2023-supplement.pdf]

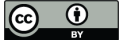

*Supplement of*

**Environmental controls on observed spatial variability of soil pore water geochemistry in small headwater catchments underlain with permafrost**

**Nathan Alec Conroy et al.**

*Correspondence to:* Nathan Alec Conroy (nconroy@lanl.gov)

The copyright of individual parts of the supplement might differ from the article licence.

## Supplement

### S1.1 Principal Components Analysis (PCA)

The PCA helps highlight some of the more interesting geochemical relationships between the different analytes. There were three components that had variance contributions above 10 %. We have chosen to focus on those for this discussion since their combined variance contribution was 46 % of the total variance; additional components only increased the total variance contribution by small increments. Principal Component 1 contributed 21.4% of the total variance (Table S2). Analytes with large weightings (i.e., eigenvalues with an absolute value > 0.25) for this component included Ca, Mg, and Mn (positive values) and Al, Ti, oxalate, Zn, and NO<sub>2</sub> (negative values). Principal Component 2 contributed 13.4% of the variance. Analytes with large weightings for this component included Zn, Si, Na, Ba, K, Cr, and Li (negative values); there were no positive values greater than 0.25 for Principal Component 2. Principal Component 3 contributed 11.3% of the total variance. Analytes with large weightings for this component included Fe, Sr, Mn, Ti, and NO<sub>2</sub> (positive values) and NO<sub>3</sub>, Na, F, and Cl (negative values). The relevance of the PCA results to general geochemical relationships and to differences between the Kougarok and Teller sites are examined in Section 4.1. Correlations between analytes for Teller and Kougarok data combined are shown in **Figure S6**.

Principal Components Analysis provides additional information about the relationships between the analytes. Analytes that have high weightings in Principal Component 1 (Ca, Mg, and Mn (positive values) and Al, Ti, oxalate, Zn, and NO<sub>2</sub> (negative values) are an assemblage with no obvious geochemical connection. However, examination of correlations (**Figure S7**, significant at p=0.05) helps clarify why these analytes appear to be important based on the PCA results. Ca and Mg are well correlated ( $r = 0.65$ ) and have a broad range of concentrations, which explains why they have the highest positive eigenvalues in Principal Component 1. Although Mn is more redox sensitive, it is correlated with Ca ( $r=0.49$ ) and Mg ( $r=0.47$ ). Mn correlations within the Teller watershed are particularly high with  $r$  values of 0.80 and 0.85 for Ca and Mg, respectively. With respect to analytes with large negative eigenvalues, Al, Ti, and oxalate have significant negative correlations with the positive eigenvalue analytes Ca, Mg, and Mn. Zn and NO<sub>2</sub> also have negative correlations with Ca, Mg, and Mn, although they were not always significant. Oxalate appears to be an important control on geochemical variability related to Principal Component 1 and has strong correlations with Al ( $r=0.60$ ) and Ti ( $r=0.53$ ), and significant correlations with Zn and NO<sub>2</sub>. However, these correlations are all driven by Kougarok. There are no significant correlations with oxalate for any analytes within the Teller. The median oxalate concentration is over an order of magnitude higher at Kougarok than Teller. Oxalate forms from fungal breakdown of plant material (Uren, 2018) and its abundance at Kougarok may be related to the degradation of alder leaf litter or woody material. Because oxalate is an effective metal chelator it might explain the significant correlations between oxalate and Al ( $r=0.60$ ), Ti ( $r=0.53$ ), and Zn ( $r=0.34$ ) within Kougarok. A significant correlation between oxalate and NO<sub>2</sub> ( $r=0.36$ ) within Kougarok also supports the hypothesis of an alder association. Median NO<sub>2</sub> concentrations at Kougarok are also an order of magnitude higher than at Teller.

Analytes with large weightings for Principal Component 2 included Zn, Si, Na, Ba, K, Cr, and Li. Si is correlated with Zn, Na, K, Cr, and Li suggesting a possible water/rock interaction control. However, Si is not correlated with Ba. Ba has strong correlations with Na ( $r=0.71$ ) and Zn ( $r=0.68$ ), and significant correlations with K, Cr, and Li. The large eigenvalues for Ba, K, Li, and Zn in Principal Component 2 appear to be related to substantially higher median concentrations at Kougarok, which are more than twice those at Teller (Table S1).

Analytes with large weightings for Principal Component 3 included Fe, Sr, Mn, Ti, and  $\text{NO}_2$  (positive values), and  $\text{NO}_3$ , Na, F, and Cl (negative values). This component includes multiple redox sensitive species ( $\text{NO}_3$ , Fe, Mn and  $\text{NO}_2$ ) and their presence in Principal Component 3 likely reflects the significant concentration differences between the two watersheds and that both watersheds have redox gradients that contribute to increased variability of these analytes. Sr is significantly correlated with Fe and Mn although it is not considered to be particularly redox sensitive. However, it is highly correlated with Ca (0.86) and strongly correlated with Mg (0.55), which both occur in Principal Component 1. It is thus likely that Sr variability was too low to generate a large eigenvalue in Principal Component 1 and so it ended up being prominent in Principal Component 3.

Overall, the PCA results appear to be highly affected by the strong geochemical differences between the two watersheds (see Principal Component 1 versus Principal Component 2 plot in Figure S6 as an example which demonstrates the large difference between the watersheds in principal component space), and many of the analytes which are prominent in one of the three components also have substantial within site variability because of water/rock interaction effects and/or redox/pH changes. The PCA also highlights the importance of oxalate and  $\text{NO}_2$  which are analytes that may not typically receive much attention. However, their prominence in Principal Component 1 and their association with alder sites at Kougarok demonstrates their biogeochemical importance at that site. In addition, oxalate may help explain associations with some metals because of its strong chelation properties; additional study would be required to evaluate this speculation.

Table S1: Geochemical modelling parameters

|                       | <b>Low<br/>Concentration<br/>(25<sup>th</sup> Percentile)</b> | <b>Median<br/>Concentration<br/>(50<sup>th</sup> Percentile)</b> | <b>High<br/>Concentration<br/>(100<sup>th</sup> Percentile)</b> |
|-----------------------|---------------------------------------------------------------|------------------------------------------------------------------|-----------------------------------------------------------------|
| <b>Al</b>             | 8.64E-07                                                      | 6.66E-06                                                         | 3.37E-04                                                        |
| <b>B</b>              | 9.39E-07                                                      | 3.58E-06                                                         | 7.14E-05                                                        |
| <b>Ba</b>             | 9.52E-07                                                      | 1.90E-06                                                         | 1.30E-05                                                        |
| <b>Br</b>             | 6.26E-08                                                      | 6.26E-08                                                         | 3.78E-06                                                        |
| <b>Cd</b>             | 5.22E-05                                                      | 9.43E-05                                                         | 2.10E-03                                                        |
| <b>Cl</b>             | 8.68E-05                                                      | 1.15E-04                                                         | 2.74E-03                                                        |
| <b>F</b>              | 1.05E-06                                                      | 2.11E-06                                                         | 2.95E-05                                                        |
| <b>Fe</b>             | 1.78E-06                                                      | 5.86E-06                                                         | 1.14E-03                                                        |
| <b>Li</b>             | 4.32E-08                                                      | 4.32E-08                                                         | 2.42E-05                                                        |
| <b>Mg</b>             | 2.87E-05                                                      | 4.10E-05                                                         | 4.44E-04                                                        |
| <b>Mn</b>             | 4.62E-08                                                      | 1.23E-07                                                         | 7.88E-06                                                        |
| <b>NO<sub>3</sub></b> | 3.98E-07                                                      | 1.24E-06                                                         | 9.97E-04                                                        |
| <b>PO<sub>4</sub></b> | 5.26E-08                                                      | 5.26E-08                                                         | 2.83E-05                                                        |
| <b>K</b>              | 5.71E-06                                                      | 1.15E-05                                                         | 2.52E-03                                                        |
| <b>Si</b>             | 6.77E-05                                                      | 1.30E-04                                                         | 6.96E-04                                                        |
| <b>Na</b>             | 1.26E-04                                                      | 1.62E-04                                                         | 8.03E-04                                                        |
| <b>Sr</b>             | 1.26E-07                                                      | 2.17E-07                                                         | 7.00E-06                                                        |
| <b>SO<sub>4</sub></b> | 2.81E-06                                                      | 6.14E-06                                                         | 2.84E-04                                                        |
| <b>Ti</b>             | 2.09E-09                                                      | 5.44E-08                                                         | 5.06E-06                                                        |
| <b>Zn</b>             | 1.37E-06                                                      | 2.79E-06                                                         | 7.11E-05                                                        |
| <b>CO<sub>3</sub></b> | 2.62E-04                                                      | 3.99E-04                                                         | 3.87E-02                                                        |

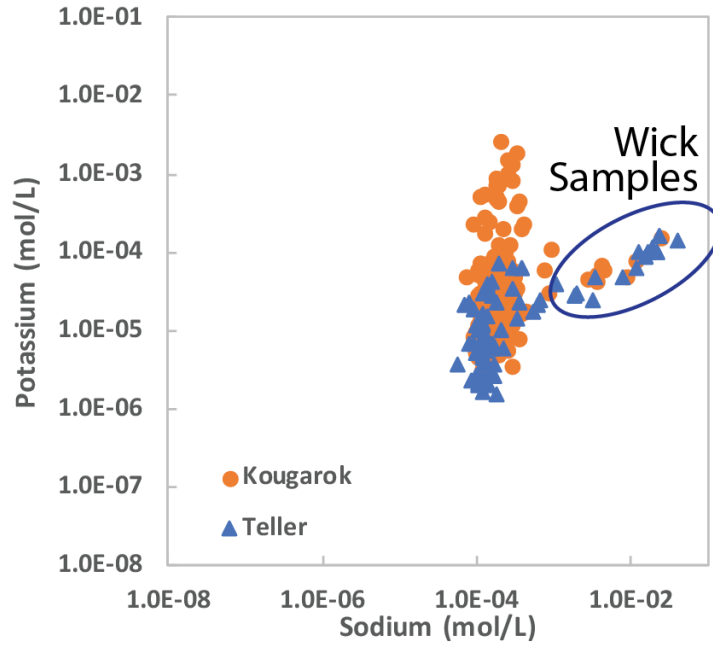

Figure S1: Evidence for leaching effects on monovalent cations associated with the use of wicks.

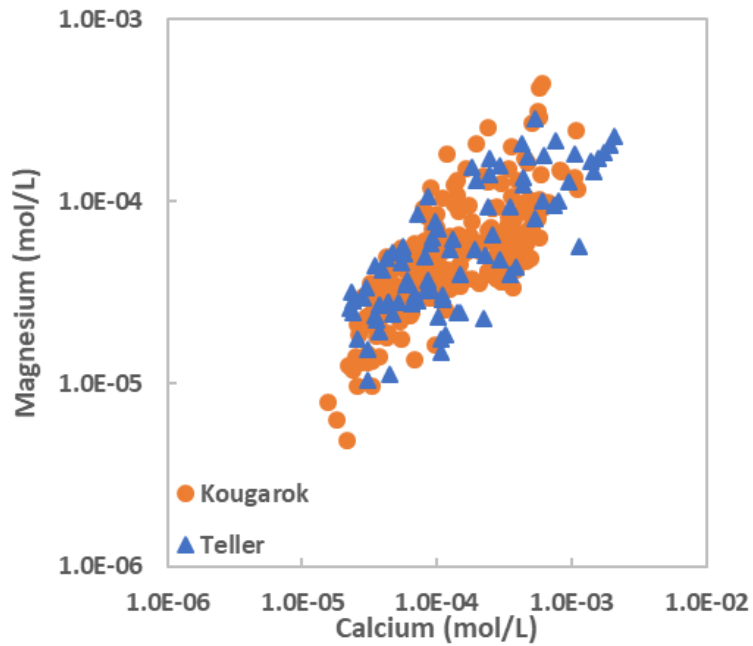

Figure S2: Complementary Figure to Figure S1, but for divalent cations.

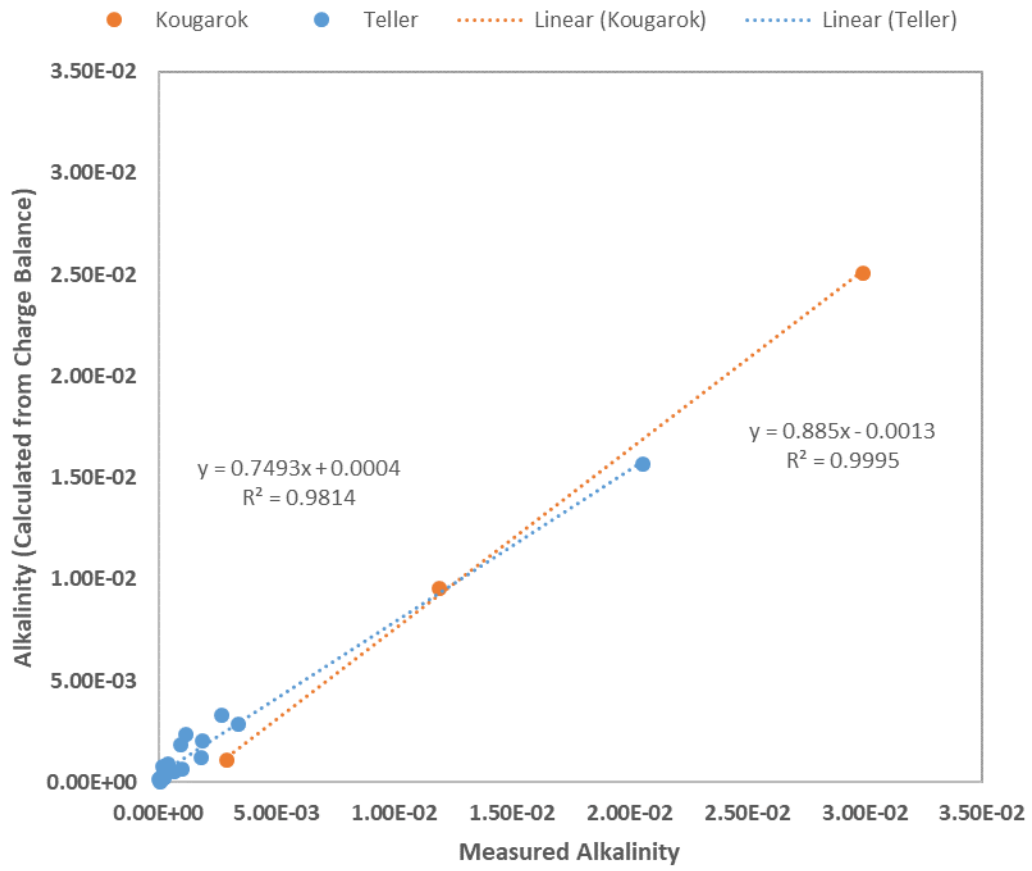

Figure S3: Alkalinity versus charge imbalance for select samples measured for alkalinity in the field.

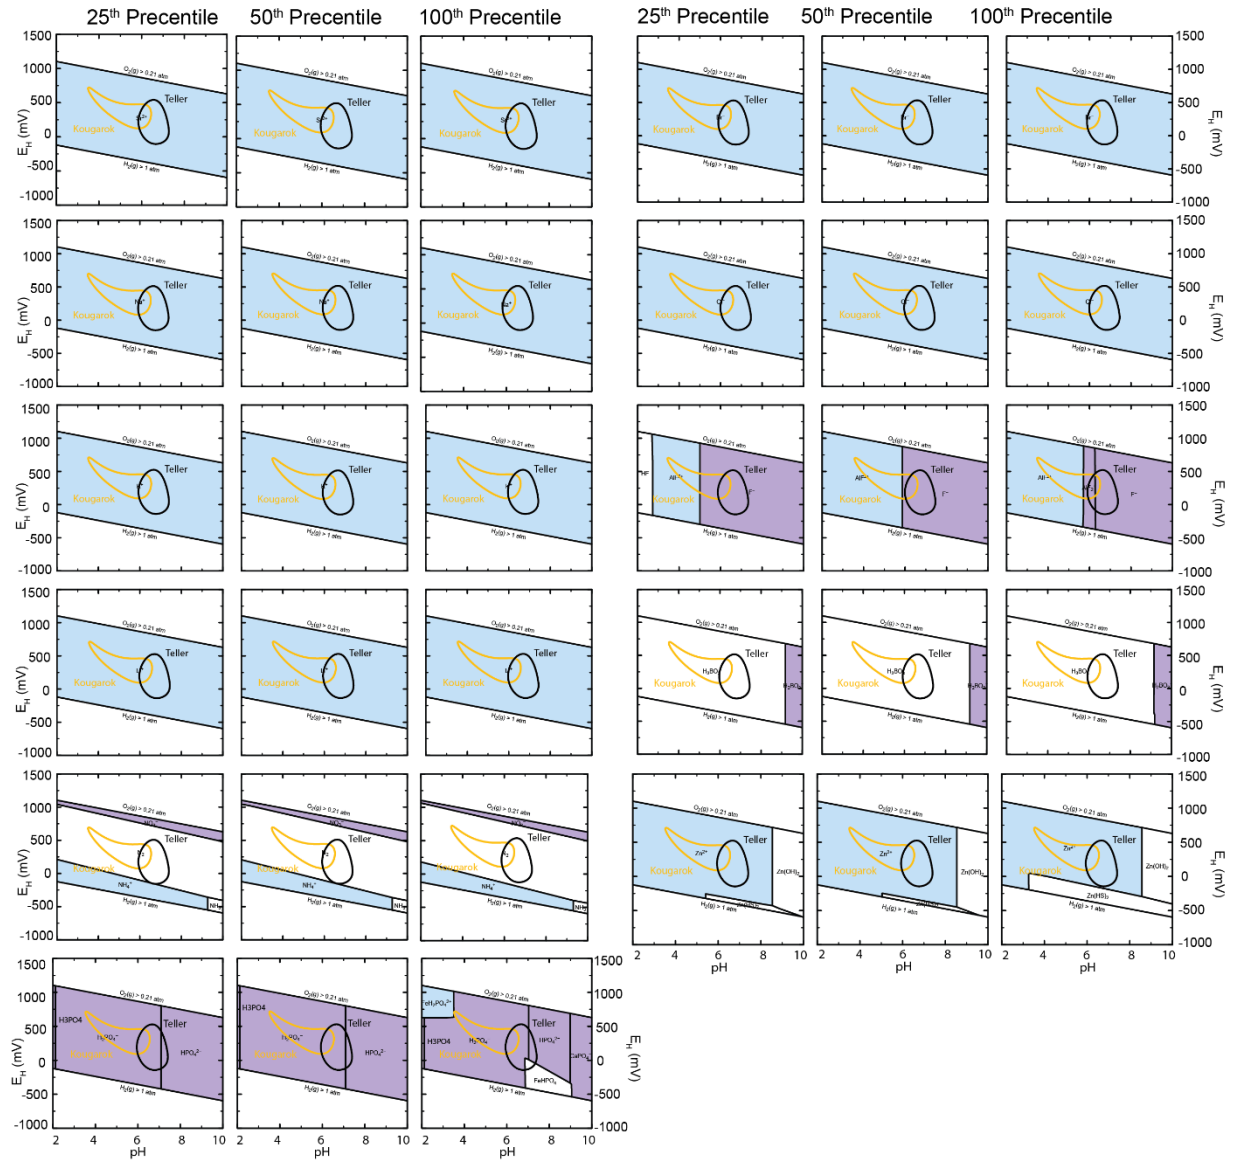

Figure S4: Eh/pH diagrams for species where no mineral phases are expected to form

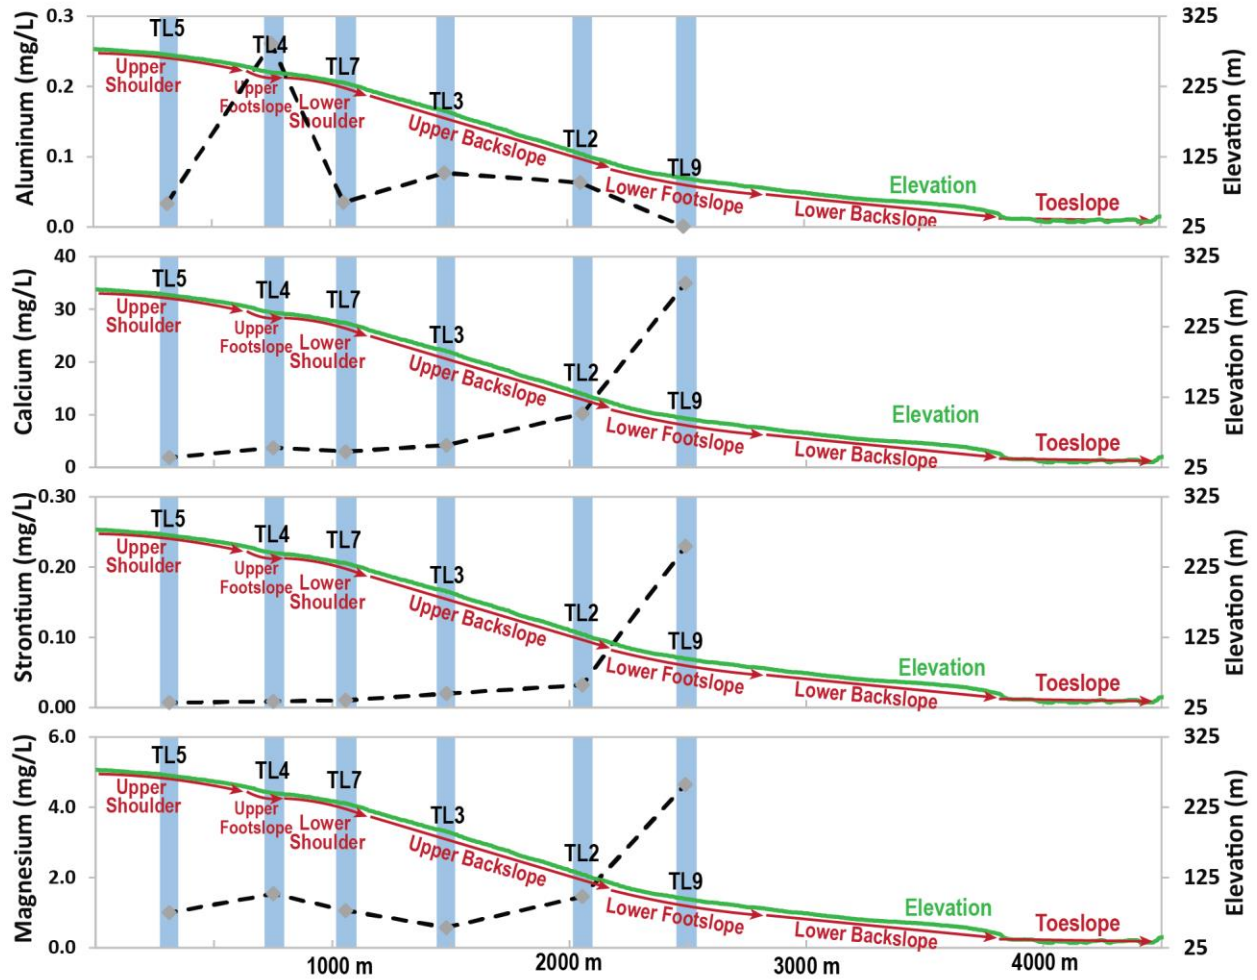

Figure S5: Median (50<sup>th</sup> percentile) concentrations (grey diamonds with dashed black lines) of Al, Ca, Sr, and Mg, with distance downslope at Teller along the topographic transect; areas of stations are indicated by blue colouring. The elevation profile of the hillslope is plotted in green, on a separate y-axis (right axis).



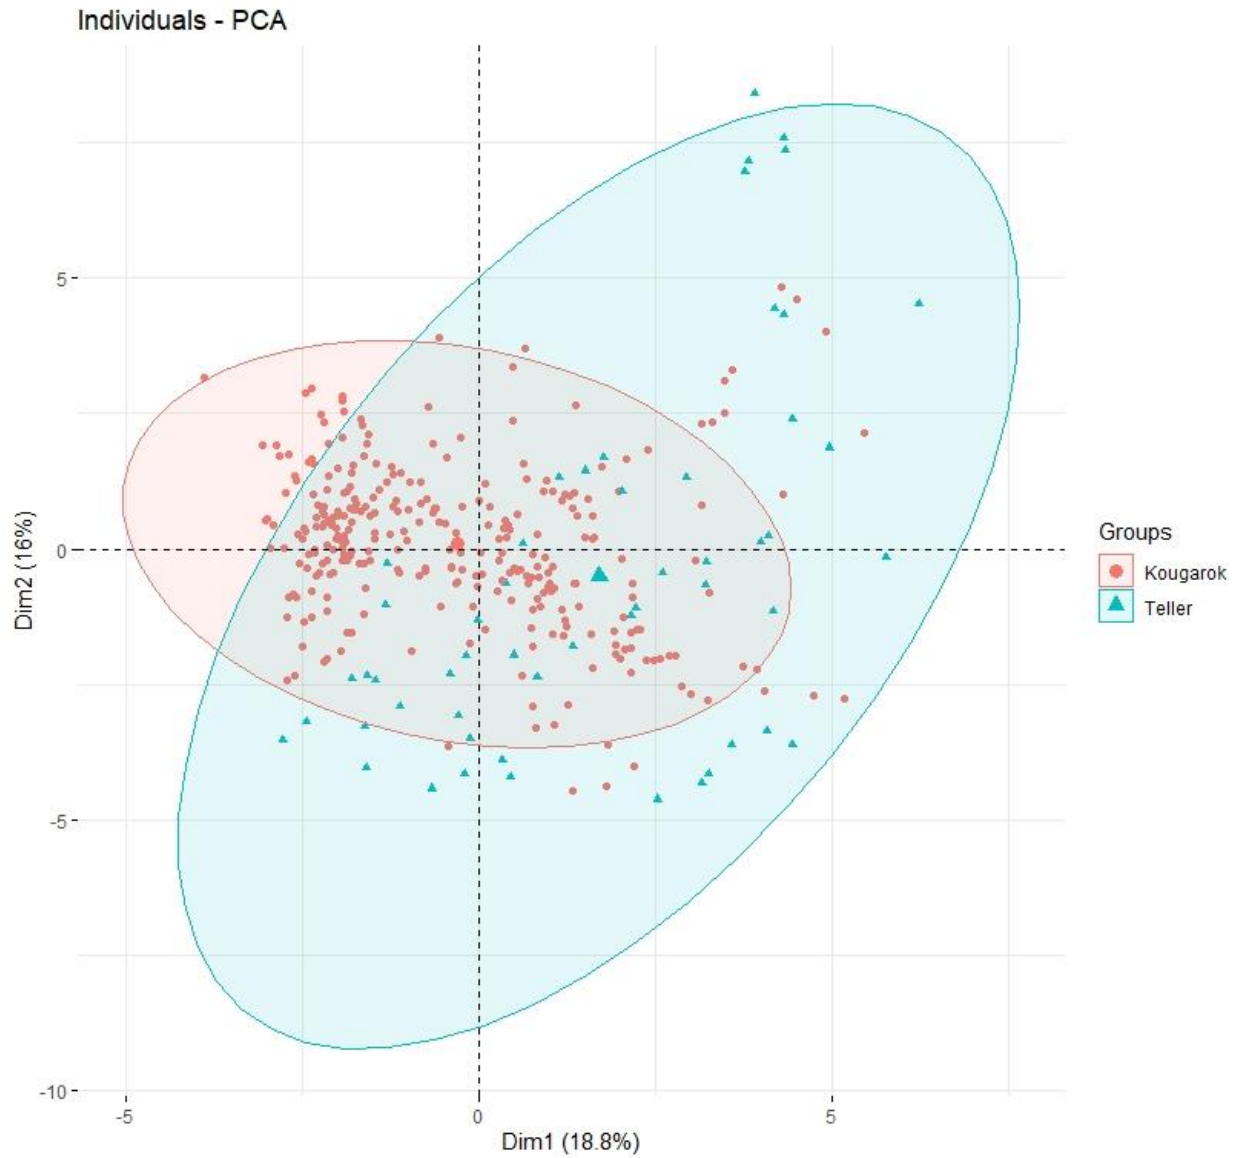

**Figure S6:** Individual samples are plotted with their scores from principal components 1 and 2, which correspond to the X and Y axes respectively. Teller samples are plotted in blue and Kougarak samples are plotted in red. The means of all the Teller and Kougarak samples are in the large circle and triangle. The ellipses around the mean indicate a 95% confidence interval.

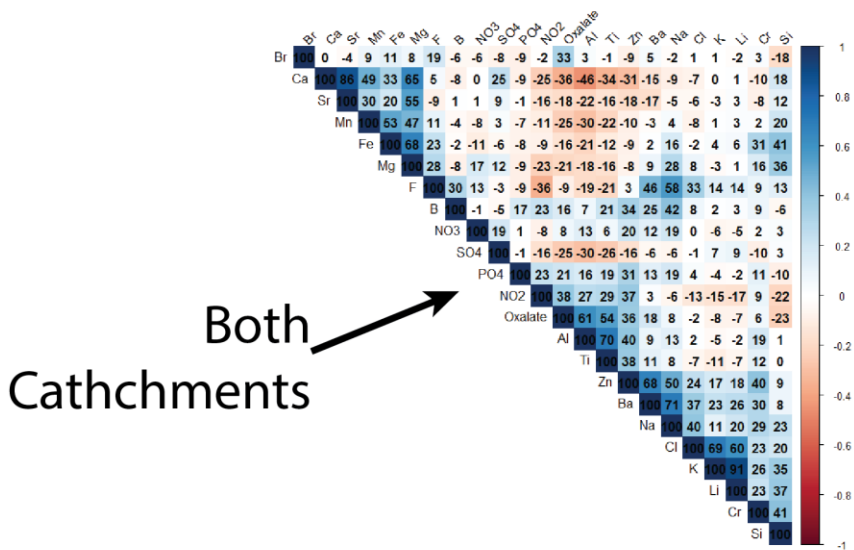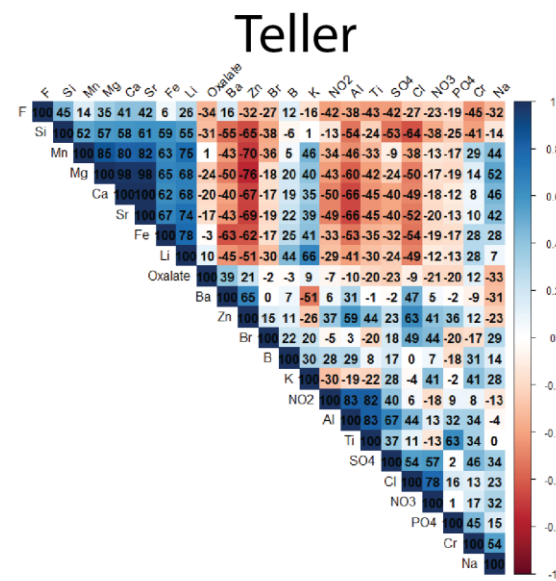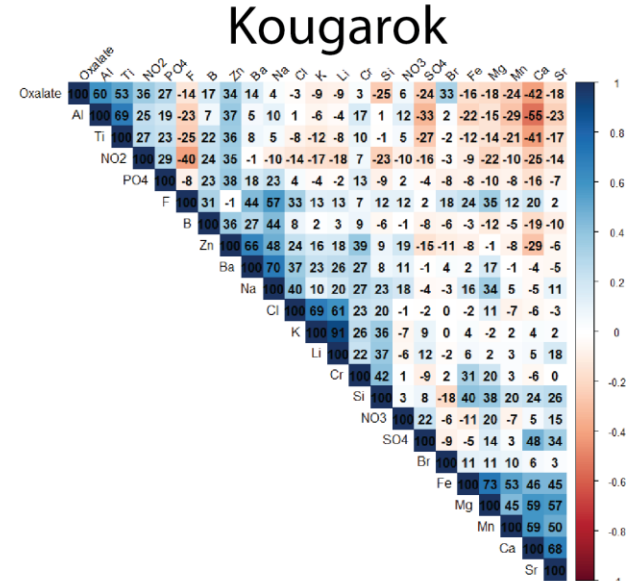

Figure S7: Principal Component Analysis correlation tables for both watersheds together (top), Teller (bottom left), and Kougarok (bottom right).

**Table S2. Principle Components 1 – 3 sorted by analyte contribution to variability (both catchments are analysed jointly). Solutes with a contribution greater than +/- 0.25 are highlighted in yellow.**

| PC1 (21.4%)    | PC2 (13.38%;<br>cumulative 34.7%) | PC3 (11.25%;<br>46.03% cumulative) |
|----------------|-----------------------------------|------------------------------------|
| 0.381 Ca       | 0.017 NO2                         | -0.387 NO3                         |
| 0.280 Mg       | -0.020 Oxalate                    | 0.454 Fe                           |
| 0.211 Mn       | -0.028 Al                         | 0.269 Sr                           |
| 0.197 SO4      | -0.032 SO4                        | 0.266 Mn                           |
| 0.162 K        | -0.052 PO4                        | 0.223 Ti                           |
| 0.152 Sr       | -0.057 NO3                        | 0.206 NO2                          |
| 0.132 Si       | -0.068 Ti                         | 0.158 Al                           |
| 0.086 F        | -0.107 Br                         | 0.138 Cr                           |
| 0.063 Fe       | -0.125 Ca                         | 0.127 Mg                           |
| 0.039 Br       | -0.135 Fe                         | 0.104 Oxalate                      |
| 0.009 Li       | -0.158 Sr                         | 0.061 Br                           |
| -0.038 Cl      | -0.162 B                          | 0.055 B                            |
| -0.098 Na      | -0.175 Mg                         | 0.039 Ca                           |
| -0.131 Cr      | -0.180 F                          | 0.031 Si                           |
| -0.133 NO3     | -0.182 Mn                         | 0.027 K                            |
| -0.144 PO4     | -0.191 Cl                         | 0.013 Zn                           |
| -0.166 Ba      | -0.268 Zn                         | -0.008 Li                          |
| -0.170 B       | -0.273 Si                         | -0.035 PO4                         |
| -0.253 NO2     | -0.307 Na                         | -0.173 Ba                          |
| -0.284 Zn      | -0.316 Ba                         | -0.185 SO4                         |
| -0.317 Oxalate | -0.355 K                          | -0.265 Na                          |
| -0.344 Ti      | -0.356 Cr                         | -0.289 F                           |
| -0.355 Al      | -0.405 Li                         | -0.330 Cl                          |

**Table S3. Principle Components 1 – 4 sorted by analyte contribution to variability (catchments analysed separately with Teller in blue and Kougarok in orange). Solutes with a contribution greater than +/- 0.25 are highlighted in yellow.**

| TL PC1<br>-36.42% |         | TL PC2<br>(20.23%; 56.65%<br>cumulative) |         | TL PC3<br>(9.86%; 66.51%<br>cumulative) |         | TL PC4<br>(8.933%; 75.45%<br>cumulative) |         | KG PC1<br>-20.92% |         | KG PC2<br>(13.21%; 34.14%<br>cumulative) |         | KG PC3<br>(11.55%; 45.69%<br>cumulative) |         | KG PC4<br>(8.449%; 54.14%<br>cumulative) |         |
|-------------------|---------|------------------------------------------|---------|-----------------------------------------|---------|------------------------------------------|---------|-------------------|---------|------------------------------------------|---------|------------------------------------------|---------|------------------------------------------|---------|
| 0.310             | Al      | 0.310                                    | F       | 0.380                                   | Cl      | 0.480                                    | Oxalate | 0.390             | Ca      | 0.010                                    | SO4     | 0.430                                    | Fe      | 0.300                                    | K       |
| 0.300             | Zn      | 0.220                                    | Si      | 0.310                                   | Br      | 0.370                                    | Br      | 0.280             | Mg      | 0.000                                    | NO3     | 0.240                                    | Mn      | 0.270                                    | Sr      |
| 0.260             | Ba      | 0.100                                    | Oxalate | 0.240                                   | Na      | 0.260                                    | K       | 0.230             | SO4     | -0.040                                   | NO2     | 0.240                                    | Sr      | 0.260                                    | SO4     |
| 0.230             | Cl      | 0.040                                    | Ba      | 0.220                                   | Ba      | 0.240                                    | Fe      | 0.210             | K       | -0.040                                   | Oxalate | 0.170                                    | Ti      | 0.210                                    | Si      |
| 0.190             | NO2     | -0.010                                   | Li      | 0.170                                   | Ca      | 0.090                                    | Li      | 0.190             | Mn      | -0.060                                   | F       | 0.170                                    | NO2     | 0.150                                    | PO4     |
| 0.180             | Ti      | -0.060                                   | Zn      | 0.150                                   | F       | 0.060                                    | B       | 0.180             | F       | -0.080                                   | PO4     | 0.130                                    | Al      | 0.130                                    | Li      |
| 0.160             | SO4     | -0.080                                   | Mn      | 0.150                                   | Sr      | 0.040                                    | SO4     | 0.150             | Si      | -0.080                                   | Al      | 0.130                                    | Mg      | 0.070                                    | Zn      |
| 0.090             | Oxalate | -0.100                                   | Sr      | 0.130                                   | NO3     | 0.030                                    | Cl      | 0.110             | Sr      | -0.090                                   | Ca      | 0.080                                    | Oxalate | 0.060                                    | Cr      |
| 0.060             | PO4     | -0.100                                   | Mg      | 0.090                                   | Mg      | 0.020                                    | NO3     | 0.060             | Br      | -0.100                                   | Br      | 0.070                                    | Br      | 0.050                                    | NO3     |
| 0.020             | Br      | -0.110                                   | Al      | 0.090                                   | SO4     | -0.030                                   | Cr      | 0.050             | Fe      | -0.130                                   | Ti      | 0.060                                    | Cr      | 0.050                                    | Ti      |
| -0.010            | B       | -0.120                                   | Cl      | 0.040                                   | Mn      | -0.050                                   | Ba      | 0.050             | Li      | -0.150                                   | Cl      | 0.060                                    | Ca      | 0.020                                    | B       |
| -0.020            | NO3     | -0.120                                   | Ca      | 0.030                                   | Zn      | -0.080                                   | Zn      | 0.010             | Cl      | -0.160                                   | Mg      | 0.000                                    | K       | 0.010                                    | NO2     |
| -0.060            | Cr      | -0.140                                   | Fe      | -0.040                                  | PO4     | -0.100                                   | Na      | -0.050            | Na      | -0.180                                   | Fe      | 0.000                                    | Si      | -0.040                                   | Ca      |
| -0.120            | F       | -0.150                                   | NO2     | -0.080                                  | Cr      | -0.100                                   | Ca      | -0.100            | Ba      | -0.190                                   | B       | -0.020                                   | B       | -0.050                                   | Al      |
| -0.140            | K       | -0.170                                   | Br      | -0.120                                  | Si      | -0.110                                   | Mg      | -0.100            | Cr      | -0.220                                   | Mn      | -0.060                                   | Zn      | -0.140                                   | Cl      |
| -0.160            | Na      | -0.170                                   | PO4     | -0.140                                  | Al      | -0.110                                   | Sr      | -0.110            | NO3     | -0.220                                   | Sr      | -0.080                                   | Li      | -0.140                                   | Mn      |
| -0.170            | Fe      | -0.180                                   | Ti      | -0.160                                  | B       | -0.110                                   | Al      | -0.160            | PO4     | -0.250                                   | Na      | -0.090                                   | PO4     | -0.150                                   | Ba      |
| -0.220            | Si      | -0.210                                   | B       | -0.160                                  | K       | -0.170                                   | Mn      | -0.160            | B       | -0.260                                   | Si      | -0.160                                   | SO4     | -0.200                                   | Oxalate |
| -0.250            | Li      | -0.310                                   | K       | -0.170                                  | Oxalate | -0.180                                   | F       | -0.250            | Zn      | -0.310                                   | Ba      | -0.230                                   | Ba      | -0.210                                   | Na      |
| -0.290            | Mn      | -0.350                                   | Na      | -0.290                                  | Ti      | -0.210                                   | Si      | -0.260            | NO2     | -0.320                                   | Zn      | -0.270                                   | F       | -0.220                                   | Mg      |
| -0.300            | Ca      | -0.350                                   | Cr      | -0.300                                  | Li      | -0.250                                   | NO2     | -0.320            | Oxalate | -0.320                                   | K       | -0.340                                   | Na      | -0.310                                   | Fe      |
| -0.310            | Sr      | -0.350                                   | SO4     | -0.310                                  | NO2     | -0.330                                   | Ti      | -0.350            | Ti      | -0.380                                   | Cr      | -0.350                                   | Cl      | -0.410                                   | F       |
| -0.320            | Mg      | -0.360                                   | NO3     | -0.390                                  | Fe      | -0.390                                   | PO4     | -0.350            | Al      | -0.390                                   | Li      | -0.420                                   | NO3     | -0.450                                   | Br      |

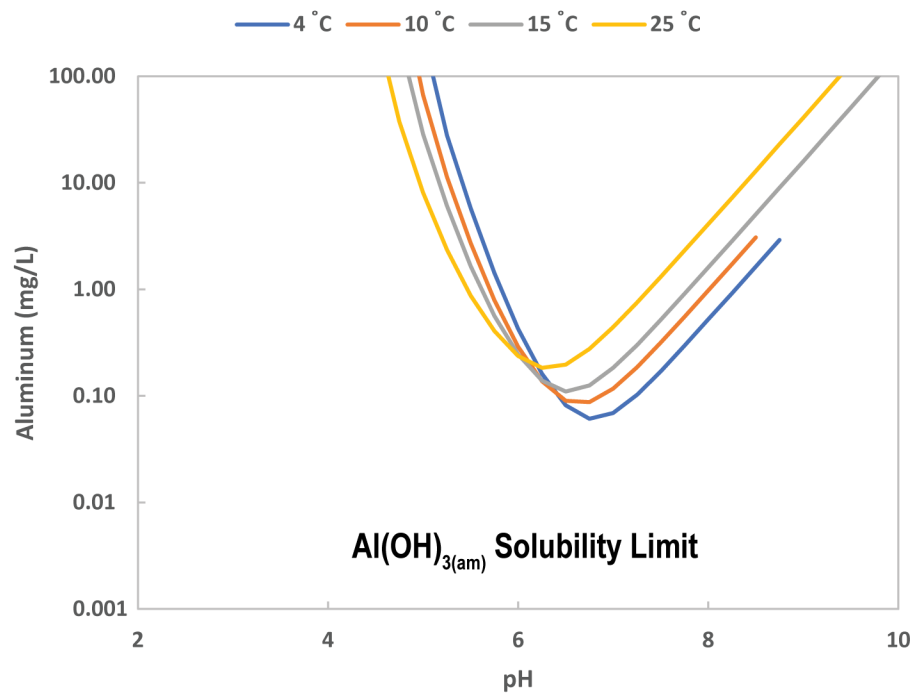

Figure S8. Modelled solution concentrations in solutions saturated with  $\text{Al(OH)}_{3(\text{am})}$  with respect to pH (x-axis) and temperature (blue = 4 °C; orange = 10 °C; gray = 15 °C; yellow = 25 °C).



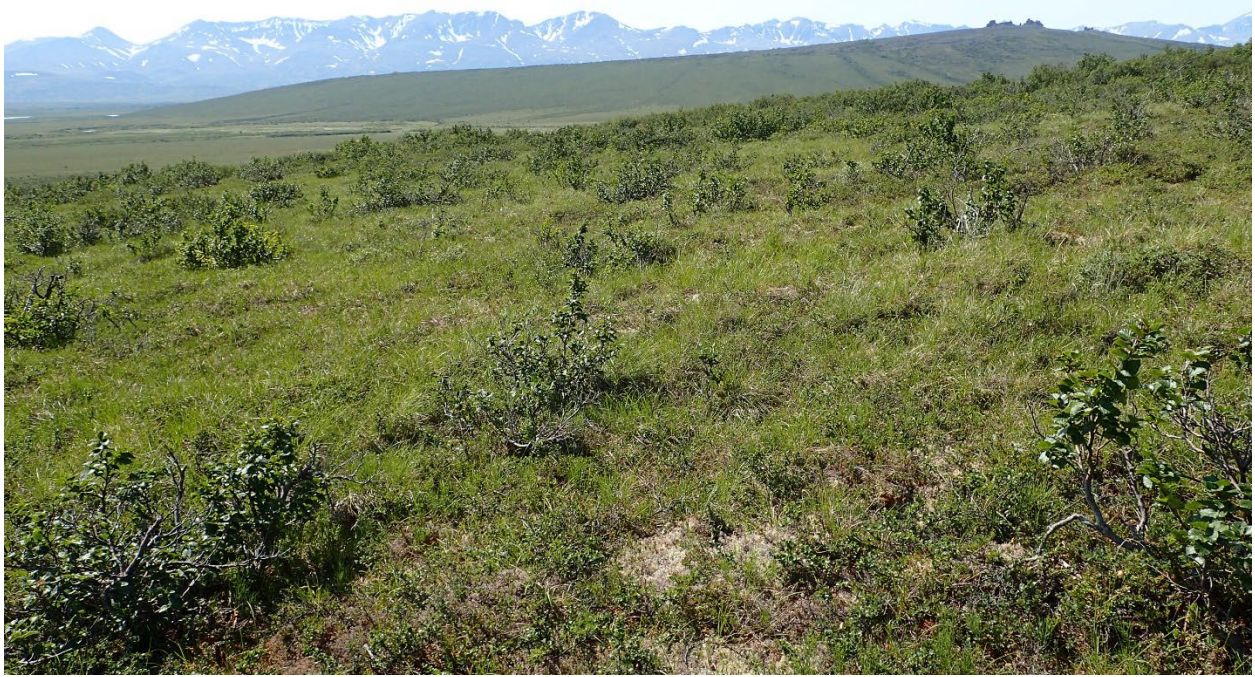

**Figure S9.** Alder savanna plant functional type at Kougarok-64 Hillslope.

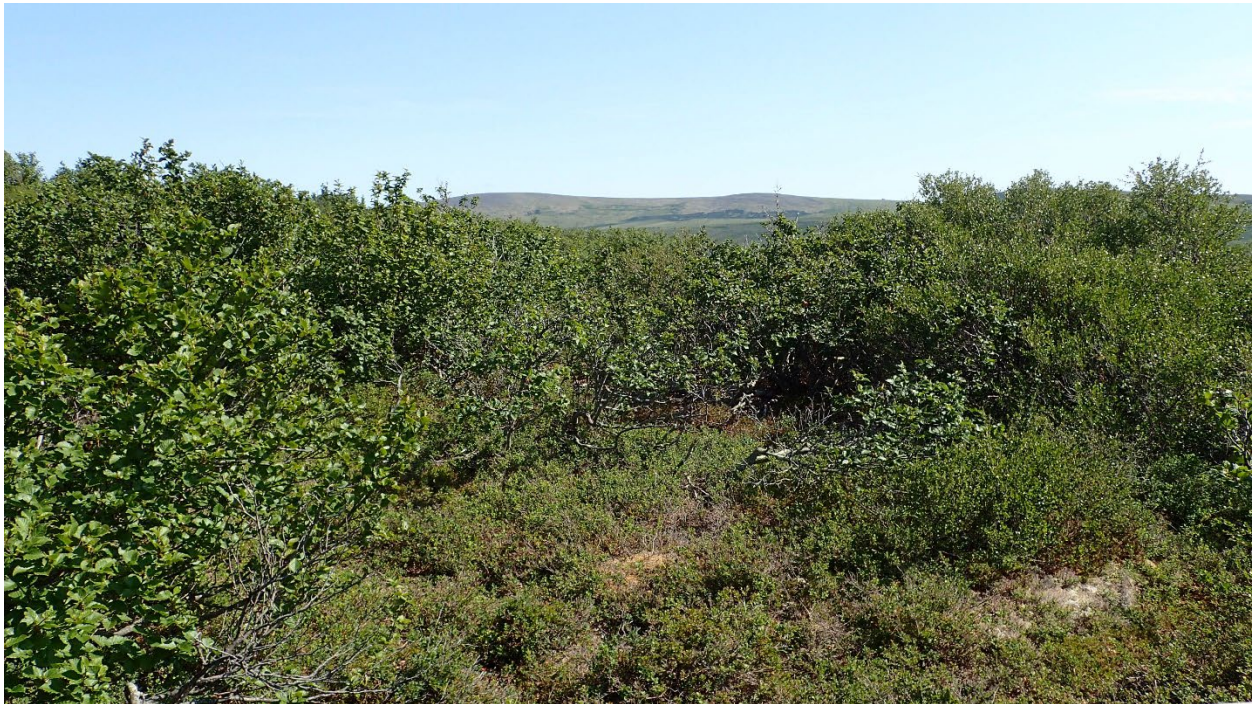

**Figure S10.** Alder shrubland plant functional type at Kougarok-64 Hillslope.



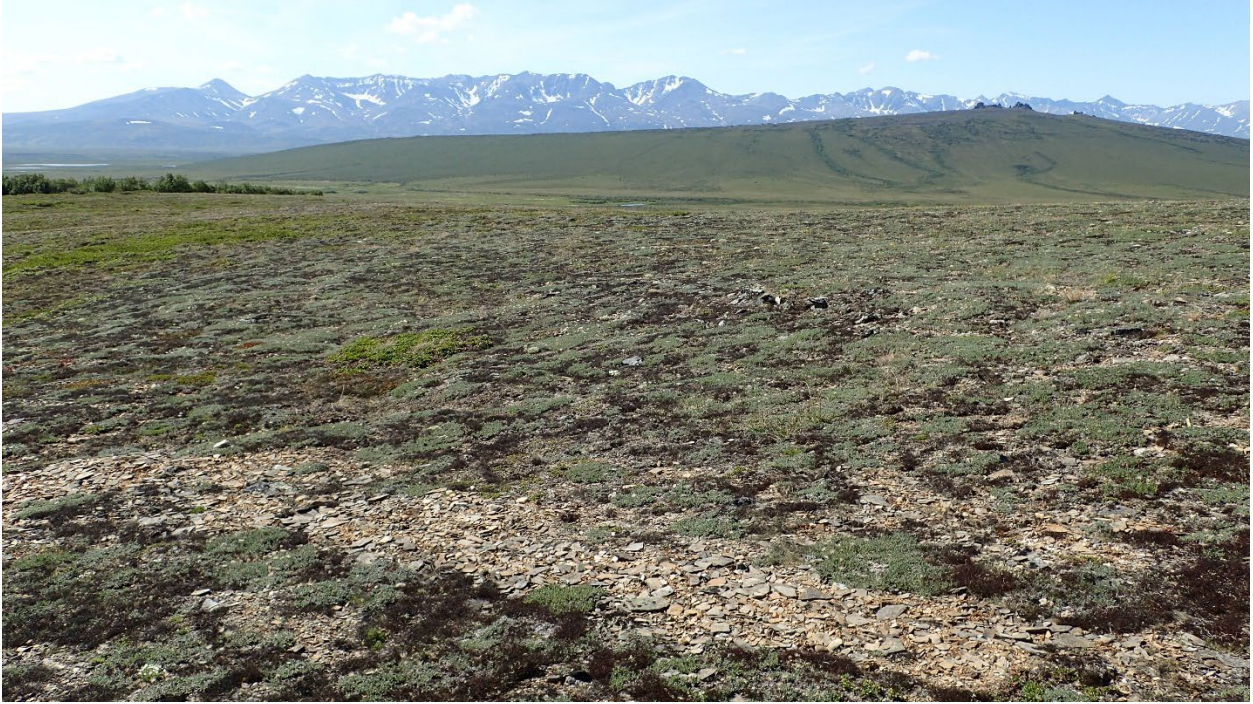

**Figure S11.** Dryas lichen shrub plant functional type at Kougarok-64 Hillslope.

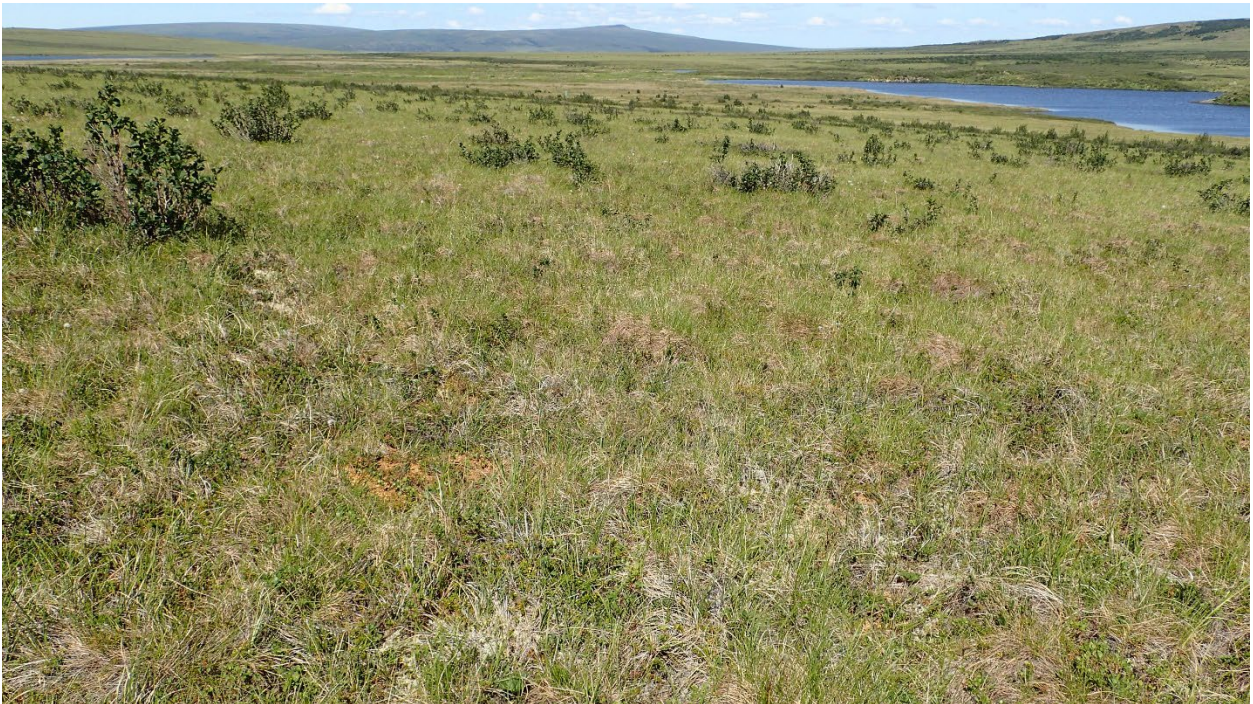

**Figure S12.** Tussock tundra plant functional type at Kougarok-64 Hillslope.



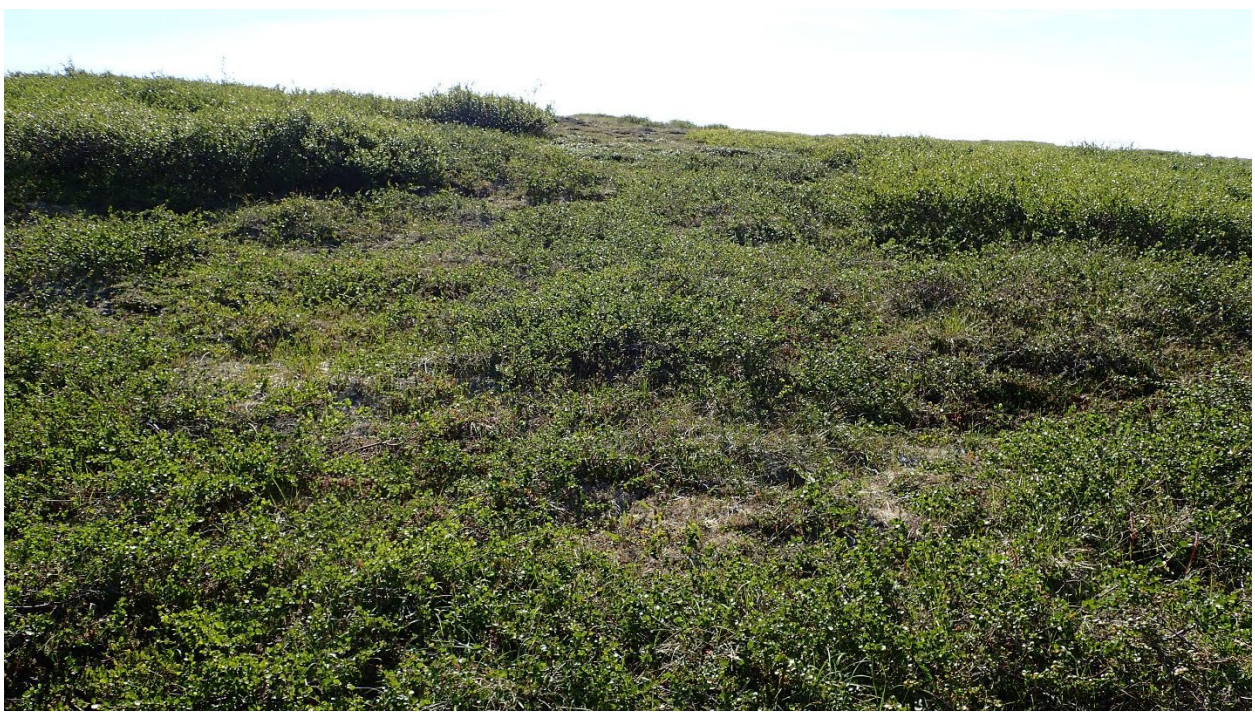

**Figure S13.** Willow birch plant functional type at Kougarok-64 Hillslope.

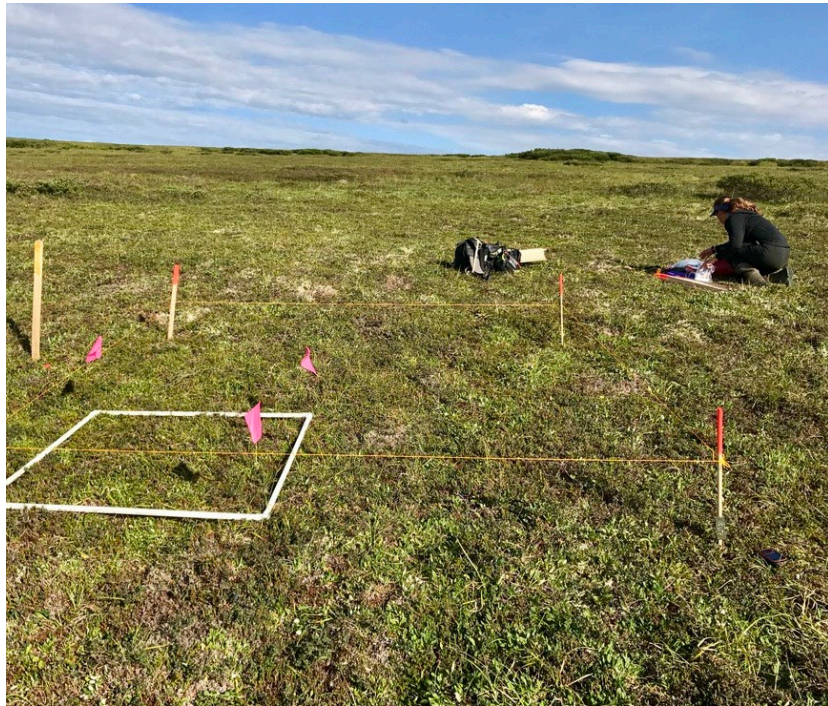

**Figure S14.** Cassiope dwarf shrub plant functional type at Teller-27 Catchment.



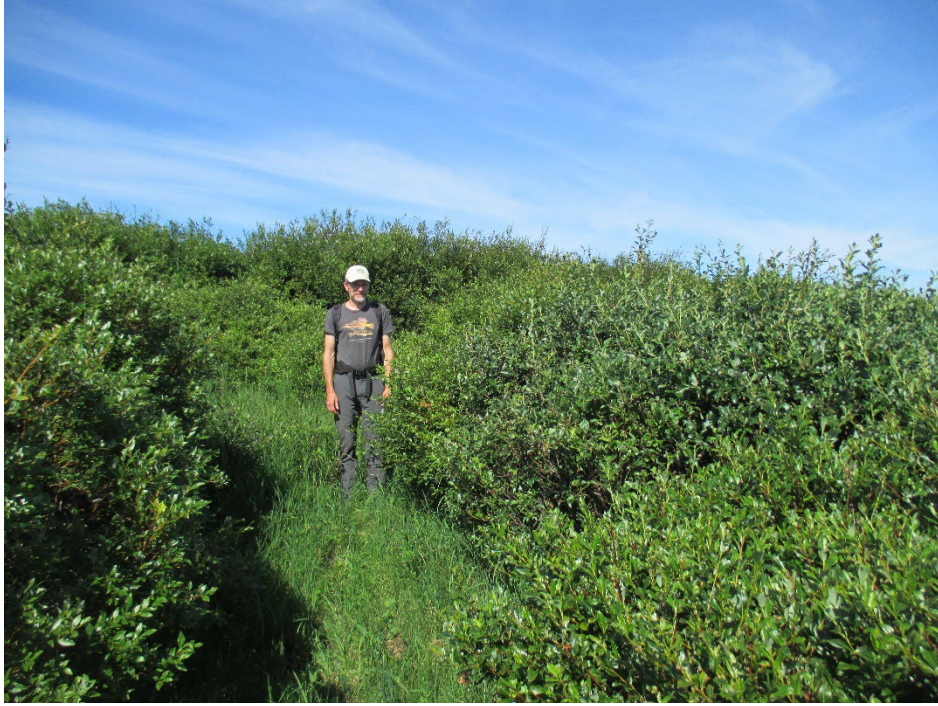

**Figure S15.** Mesic willow shrubland plant functional type at Teller-27 Catchment.

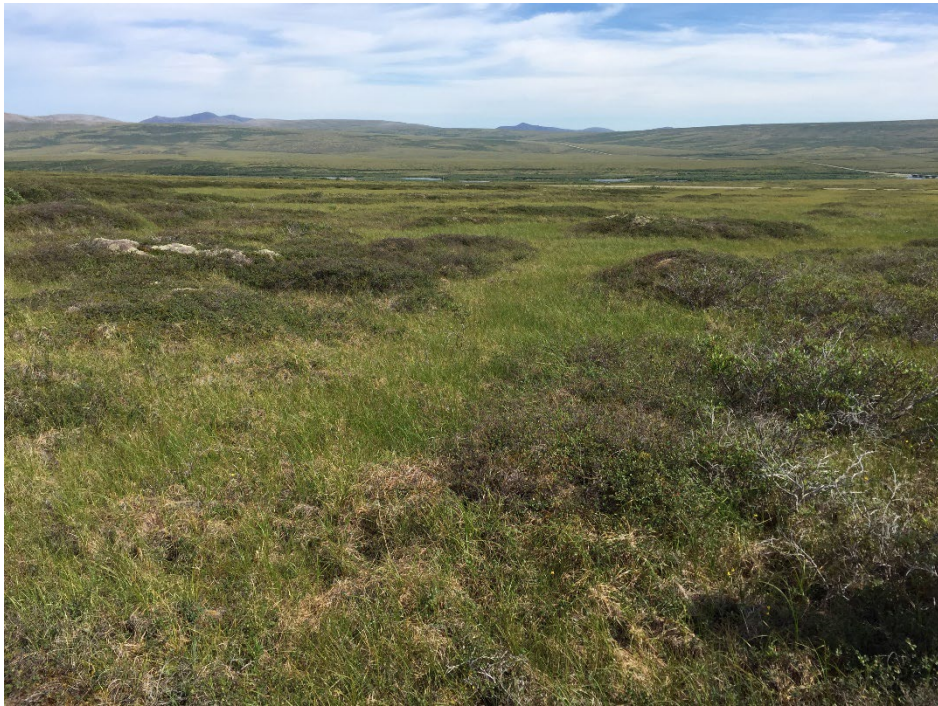

**Figure S16.** Wetland complex plant functional type at Teller-27 Catchment.

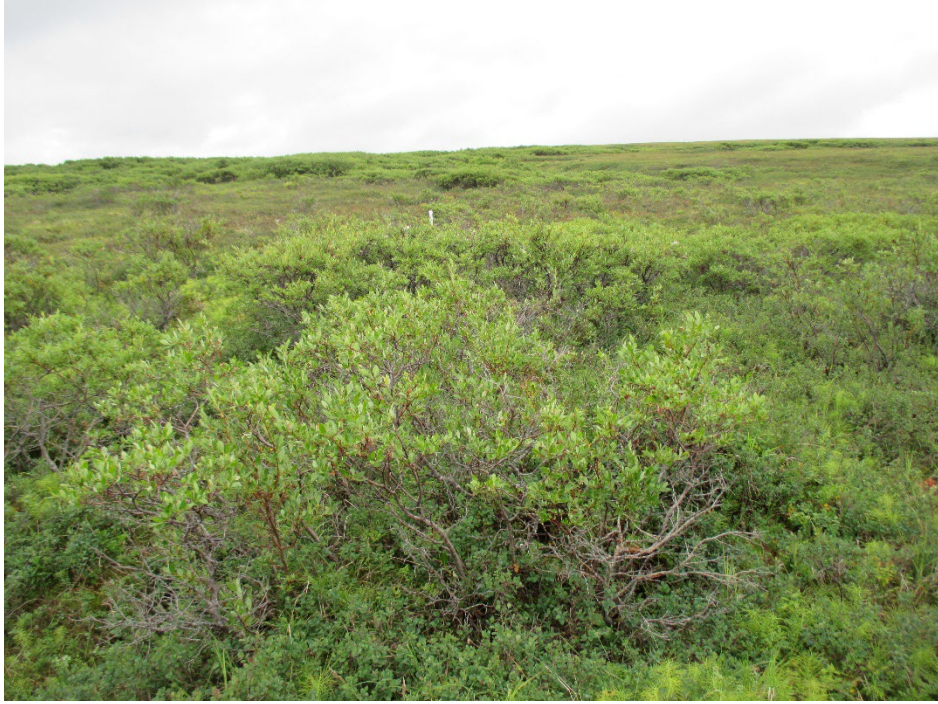

**Figure S17.** Willow birch tundra plant functional type at Teller-27 Catchment.

## S1.2 PhreePlot Example Model Code

The following is an example code used to generate the 25<sup>th</sup> percentile plots for strontium in Figure #.

```
SPECIATION
5   jobTitle      "Kougarok 25 %"
   database      teller_kougarok.dat
   calculationType ht1      # grid method
   calculationMethod 1      # 1=calculate
   mainSpecies   Sr
10  xmin         2.0      # pH range (x-axis) 2-10
   xmax         10.0
   ymin         -90.0    # log f(O2(g)) range (
   ymax         0.0
   resolution   250     # 250 x 250 grid
15
PLOT
   plotTitle     "25 Percentile Values"
   xtitle        pH
   yscale        Eh
20  pymin        -1
   pymajor       0.5
   pdf           T
CHEMISTRY
25  include 'ht1.inc'

SOLUTION 1
   pH           1.8
   units        mol/kgw
30  C           2.62E-04
   Al           8.64E-07
   B            9.39E-07
   Ba           9.52E-07
   Br           6.26E-08
35  Ca           5.22E-05
   Cl           8.68E-05
   F            1.05E-06
   Fe           1.78E-06
   Li           4.32E-08
40  Mg           2.87E-05
   Mn           4.62E-08
   N            3.98E-07
   P            5.26E-08
   K            5.71E-06
45  Si           6.77E-05
   Na           1.26E-04
   Sr           1.26E-07
   S            2.81E-06
   Ti           2.09E-09
50  Zn           1.37E-06
SAVE solution 1
END

USE solution 1
```

```

55 EQUILIBRIUM_PHASES 1
    Fix_H+ -<x_axis> NaOH 10
    -force_equality true
    O2(g) <y_axis>
60     Calcite    0 0
        Gypsum    0 0
        Al(OH)3(a) 0 0
        Strontianite 0 0
        Fe(OH)3(a) 0 0
65     Dolomite   0 0
        Barite     0 0
        Fluorite   0 0
        Chalcedony 0 0
        Pyrite     0 0
70     Pyrolusite 0 0
        Hausmannite 0 0
        Manganite  0 0
        Pyrochroite 0 0
        Celestite  0 0
75     Witherite  0 0
        Rhodochrosite 0 0
        Siderite   0 0
        Sepiolite  0 0
        Sylvite    0 0
80     Halite     0 0
END

```

### S1.3 Tables of Intra-site Mann-Whitney U Testing results

85 The following pages contain the intra-site Mann-Whitney U Testing results organized into COI specific tables.

# Teller Intensive Station Mann Whitney U-Test Results

## Aluminum

| n= (top / left / total) | TL_IS2_      | TL_IS3_      | TL_IS4_      | TL_IS5_      | TL_IS6_      | TL_IS7_      | TL_IS8_     | TL_IS9_ |
|-------------------------|--------------|--------------|--------------|--------------|--------------|--------------|-------------|---------|
| TL_IS2_                 |              |              |              |              |              |              |             |         |
| TL_IS3_                 | 8 / 6 / 14   |              |              |              |              |              |             |         |
| TL_IS4_                 | 8 / 7 / 15   | 6 / 7 / 13   |              |              |              |              |             |         |
| TL_IS5_                 | 8 / 10 / 18  | 6 / 10 / 16  | 7 / 10 / 17  |              |              |              |             |         |
| TL_IS6_                 | 8 / 5 / 13   | 6 / 5 / 11   | 7 / 5 / 12   |              |              |              |             |         |
| TL_IS7_                 | 8 / 6 / 14   | 6 / 6 / 12   | 7 / 6 / 13   | 10 / 6 / 16  | 5 / 6 / 11   |              |             |         |
| TL_IS8_                 | 8 / 6 / 14   | 6 / 6 / 12   | 7 / 6 / 13   | 10 / 6 / 16  | 5 / 6 / 11   | 6 / 6 / 12   |             |         |
| TL_IS9_                 | 8 / 10 / 18  | 6 / 10 / 16  | 7 / 10 / 17  | 10 / 10 / 20 | 5 / 10 / 15  | 6 / 10 / 16  | 6 / 10 / 16 |         |
| Σ[Rank] (top / left)    | TL_IS2_      | TL_IS3_      | TL_IS4_      | TL_IS5_      | TL_IS6_      | TL_IS7_      | TL_IS8_     | TL_IS9_ |
| TL_IS2_                 |              |              |              |              |              |              |             |         |
| TL_IS3_                 | 55 / 50      |              |              |              |              |              |             |         |
| TL_IS4_                 | 48 / 72      | 31 / 60      |              |              |              |              |             |         |
| TL_IS5_                 | 95 / 76      | 67 / 69      | 95 / 58      |              |              |              |             |         |
| TL_IS6_                 | 63 / 28      | 41 / 25      | 57 / 21      | 80 / 40      |              |              |             |         |
| TL_IS7_                 | 71 / 34      | 47 / 31      | 69 / 22      | 90 / 46      | 32 / 34      |              |             |         |
| TL_IS8_                 | 77 / 28      | 54 / 24      | 70 / 21      | 99 / 37      | 39 / 27      | 45 / 33      |             |         |
| TL_IS9_                 | 110 / 61     | 77 / 59      | 97 / 56      | 147 / 63     | 61 / 59      | 67 / 69      | 61.5 / 74.5 |         |
| U (top / left)          | TL_IS2_      | TL_IS3_      | TL_IS4_      | TL_IS5_      | TL_IS6_      | TL_IS7_      | TL_IS8_     | TL_IS9_ |
| TL_IS2_                 |              |              |              |              |              |              |             |         |
| TL_IS3_                 | 29 / 19      |              |              |              |              |              |             |         |
| TL_IS4_                 | 44 / 12      | 32 / 10      |              |              |              |              |             |         |
| TL_IS5_                 | 21 / 59      | 14 / 46      | 3 / 67       |              |              |              |             |         |
| TL_IS6_                 | 13 / 27      | 10 / 20      | 6 / 29       | 25 / 25      |              |              |             |         |
| TL_IS7_                 | 13 / 35      | 10 / 26      | 1 / 41       | 25 / 35      | 13 / 17      |              |             |         |
| TL_IS8_                 | 7 / 41       | 3 / 33       | 0 / 42       | 16 / 44      | 6 / 24       | 12 / 24      |             |         |
| TL_IS9_                 | 6 / 74       | 4 / 56       | 1 / 69       | 8 / 92       | 4 / 46       | 14 / 46      | 19.5 / 40.5 |         |
| z                       | TL_IS2_      | TL_IS3_      | TL_IS4_      | TL_IS5_      | TL_IS6_      | TL_IS7_      | TL_IS8_     | TL_IS9_ |
| TL_IS2_                 |              |              |              |              |              |              |             |         |
| TL_IS3_                 | 0.65         |              |              |              |              |              |             |         |
| TL_IS4_                 | 1.85         | 1.57         |              |              |              |              |             |         |
| TL_IS5_                 | 1.69         | 1.74         | <b>3.12</b>  |              |              |              |             |         |
| TL_IS6_                 | 1.02         | 0.91         | 1.87         | 0.00         |              |              |             |         |
| TL_IS7_                 | 1.42         | 1.28         | <b>2.86</b>  | 0.54         | 0.37         |              |             |         |
| TL_IS8_                 | <b>2.19</b>  | <b>2.40</b>  | <b>3.00</b>  | 1.52         | 1.64         | 0.96         |             |         |
| TL_IS9_                 | <b>3.02</b>  | <b>2.82</b>  | <b>3.32</b>  | <b>3.17</b>  | <b>2.57</b>  | 1.74         | 1.14        |         |
| ES                      | TL_IS2_      | TL_IS3_      | TL_IS4_      | TL_IS5_      | TL_IS6_      | TL_IS7_      | TL_IS8_     | TL_IS9_ |
| TL_IS2_                 |              |              |              |              |              |              |             |         |
| TL_IS3_                 | 0.05         |              |              |              |              |              |             |         |
| TL_IS4_                 | 0.12         | 0.12         |              |              |              |              |             |         |
| TL_IS5_                 | 0.09         | 0.11         | 0.18         |              |              |              |             |         |
| TL_IS6_                 | 0.08         | 0.08         | 0.16         | 0.00         |              |              |             |         |
| TL_IS7_                 | 0.10         | 0.11         | 0.22         | 0.03         | 0.03         |              |             |         |
| TL_IS8_                 | 0.16         | 0.20         | 0.23         | 0.09         | 0.15         | 0.08         |             |         |
| TL_IS9_                 | 0.17         | 0.18         | 0.20         | 0.16         | 0.17         | 0.11         | 0.07        |         |
| Degree of Association   | TL_IS2_      | TL_IS3_      | TL_IS4_      | TL_IS5_      | TL_IS6_      | TL_IS7_      | TL_IS8_     | TL_IS9_ |
| TL_IS2_                 |              |              |              |              |              |              |             |         |
| TL_IS3_                 | small        |              |              |              |              |              |             |         |
| TL_IS4_                 | small-medium | small-medium |              |              |              |              |             |         |
| TL_IS5_                 | small        | small-medium | small-medium |              |              |              |             |         |
| TL_IS6_                 | small        | small        | small-medium | small        |              |              |             |         |
| TL_IS7_                 | small-medium | small-medium | small-medium | small        | small        |              |             |         |
| TL_IS8_                 | small-medium | small-medium | small-medium | small        | small-medium | small        |             |         |
| TL_IS9_                 | small-medium | small-medium | small-medium | small-medium | small-medium | small-medium | small       |         |
| Significantly Different | TL_IS2_      | TL_IS3_      | TL_IS4_      | TL_IS5_      | TL_IS6_      | TL_IS7_      | TL_IS8_     | TL_IS9_ |
| TL_IS2_                 |              |              |              |              |              |              |             |         |
| TL_IS3_                 | NO           |              |              |              |              |              |             |         |
| TL_IS4_                 | NO           | NO           |              |              |              |              |             |         |
| TL_IS5_                 | NO           | NO           | <b>YES</b>   |              |              |              |             |         |
| TL_IS6_                 | NO           | NO           | NO           | NO           |              |              |             |         |
| TL_IS7_                 | NO           | NO           | <b>YES</b>   | NO           | NO           |              |             |         |
| TL_IS8_                 | <b>YES</b>   | <b>YES</b>   | <b>YES</b>   | NO           | NO           | NO           |             |         |
| TL_IS9_                 | <b>YES</b>   | <b>YES</b>   | <b>YES</b>   | <b>YES</b>   | <b>YES</b>   | NO           | NO          |         |













## Teller Intensive Station Mann Whitney U-Test Results Chloride

| n= (top / left / total) | TL_IS2_      | TL_IS3_      | TL_IS4_      | TL_IS5_      | TL_IS6_     | TL_IS7_      | TL_IS8_     | TL_IS9_ |
|-------------------------|--------------|--------------|--------------|--------------|-------------|--------------|-------------|---------|
| TL_IS2_                 |              |              |              |              |             |              |             |         |
| TL_IS3_                 | 8 / 6 / 14   |              |              |              |             |              |             |         |
| TL_IS4_                 | 8 / 7 / 15   | 6 / 7 / 13   |              |              |             |              |             |         |
| TL_IS5_                 | 8 / 10 / 18  | 6 / 10 / 16  | 7 / 10 / 17  |              |             |              |             |         |
| TL_IS6_                 | 8 / 5 / 13   | 6 / 5 / 11   | 7 / 5 / 12   |              |             |              |             |         |
| TL_IS7_                 | 8 / 6 / 14   | 6 / 6 / 12   | 7 / 6 / 13   | 10 / 6 / 16  | 5 / 6 / 11  |              |             |         |
| TL_IS8_                 | 8 / 6 / 14   | 6 / 6 / 12   | 7 / 6 / 13   | 10 / 6 / 16  | 5 / 6 / 11  | 6 / 6 / 12   |             |         |
| TL_IS9_                 | 8 / 10 / 18  | 6 / 10 / 16  | 7 / 10 / 17  | 10 / 10 / 20 | 5 / 10 / 15 | 6 / 10 / 16  | 6 / 10 / 16 |         |
| Σ[Rank] (top / left)    | TL_IS2_      | TL_IS3_      | TL_IS4_      | TL_IS5_      | TL_IS6_     | TL_IS7_      | TL_IS8_     | TL_IS9_ |
| TL_IS2_                 |              |              |              |              |             |              |             |         |
| TL_IS3_                 | 72 / 33      |              |              |              |             |              |             |         |
| TL_IS4_                 | 80 / 40      | 44 / 47      |              |              |             |              |             |         |
| TL_IS5_                 | 97 / 74      | 51 / 85      | 56 / 97      |              |             |              |             |         |
| TL_IS6_                 | 56.5 / 34.5  | 30 / 36      | 36 / 42      | 71 / 49      |             |              |             |         |
| TL_IS7_                 | 50 / 55      | 27 / 51      | 35 / 56      | 65 / 71      | 25 / 41     |              |             |         |
| TL_IS8_                 | 63 / 42      | 32 / 46      | 39 / 52      | 73 / 63      | 30 / 36     | 46 / 32      |             |         |
| TL_IS9_                 | 98 / 73      | 45 / 91      | 57 / 96      | 99 / 111     | 49 / 71     | 72 / 64      | 59 / 77     |         |
| U (top / left)          | TL_IS2_      | TL_IS3_      | TL_IS4_      | TL_IS5_      | TL_IS6_     | TL_IS7_      | TL_IS8_     | TL_IS9_ |
| TL_IS2_                 |              |              |              |              |             |              |             |         |
| TL_IS3_                 | 12 / 36      |              |              |              |             |              |             |         |
| TL_IS4_                 | 12 / 44      | 19 / 23      |              |              |             |              |             |         |
| TL_IS5_                 | 19 / 61      | 30 / 30      | 42 / 28      |              |             |              |             |         |
| TL_IS6_                 | 19.5 / 20.5  | 21 / 9       | 27 / 8       | 34 / 16      |             |              |             |         |
| TL_IS7_                 | 34 / 14      | 30 / 6       | 35 / 7       | 50 / 10      | 20 / 10     |              |             |         |
| TL_IS8_                 | 21 / 27      | 25 / 11      | 31 / 11      | 42 / 18      | 15 / 15     | 11 / 25      |             |         |
| TL_IS9_                 | 18 / 62      | 36 / 24      | 41 / 29      | 56 / 44      | 16 / 34     | 9 / 51       | 22 / 38     |         |
| z                       | TL_IS2_      | TL_IS3_      | TL_IS4_      | TL_IS5_      | TL_IS6_     | TL_IS7_      | TL_IS8_     | TL_IS9_ |
| TL_IS2_                 |              |              |              |              |             |              |             |         |
| TL_IS3_                 | 1.55         |              |              |              |             |              |             |         |
| TL_IS4_                 | 1.85         | 0.29         |              |              |             |              |             |         |
| TL_IS5_                 | 1.87         | 0.00         | 0.68         |              |             |              |             |         |
| TL_IS6_                 | 0.07         | 1.10         | 1.54         | 1.10         |             |              |             |         |
| TL_IS7_                 | 1.29         | 1.92         | <b>2.00</b>  | <b>2.17</b>  | 0.91        |              |             |         |
| TL_IS8_                 | 0.39         | 1.12         | 1.43         | 1.30         | 0.00        | 1.12         |             |         |
| TL_IS9_                 | 1.95         | 0.65         | 0.59         | 0.45         | 1.10        | <b>2.28</b>  | 0.87        |         |
| ES                      | TL_IS2_      | TL_IS3_      | TL_IS4_      | TL_IS5_      | TL_IS6_     | TL_IS7_      | TL_IS8_     | TL_IS9_ |
| TL_IS2_                 |              |              |              |              |             |              |             |         |
| TL_IS3_                 | 0.11         |              |              |              |             |              |             |         |
| TL_IS4_                 | 0.12         | 0.02         |              |              |             |              |             |         |
| TL_IS5_                 | 0.10         | 0.00         | 0.04         |              |             |              |             |         |
| TL_IS6_                 | 0.01         | 0.10         | 0.13         | 0.07         |             |              |             |         |
| TL_IS7_                 | 0.09         | 0.16         | 0.15         | 0.14         | 0.08        |              |             |         |
| TL_IS8_                 | 0.03         | 0.09         | 0.11         | 0.08         | 0.00        | 0.09         |             |         |
| TL_IS9_                 | 0.11         | 0.04         | 0.03         | 0.02         | 0.07        | 0.14         | 0.05        |         |
| Degree of Association   | TL_IS2_      | TL_IS3_      | TL_IS4_      | TL_IS5_      | TL_IS6_     | TL_IS7_      | TL_IS8_     | TL_IS9_ |
| TL_IS2_                 |              |              |              |              |             |              |             |         |
| TL_IS3_                 | small-medium |              |              |              |             |              |             |         |
| TL_IS4_                 | small-medium | small        |              |              |             |              |             |         |
| TL_IS5_                 | small-medium | small        | small        |              |             |              |             |         |
| TL_IS6_                 | small        | small        | small-medium | small        |             |              |             |         |
| TL_IS7_                 | small        | small-medium | small-medium | small-medium | small       |              |             |         |
| TL_IS8_                 | small        | small        | small-medium | small        | small       | small        |             |         |
| TL_IS9_                 | small-medium | small        | small        | small        | small       | small-medium | small       |         |
| Significantly Different | TL_IS2_      | TL_IS3_      | TL_IS4_      | TL_IS5_      | TL_IS6_     | TL_IS7_      | TL_IS8_     | TL_IS9_ |
| TL_IS2_                 |              |              |              |              |             |              |             |         |
| TL_IS3_                 | NO           |              |              |              |             |              |             |         |
| TL_IS4_                 | NO           | NO           |              |              |             |              |             |         |
| TL_IS5_                 | NO           | NO           | NO           |              |             |              |             |         |
| TL_IS6_                 | NO           | NO           | NO           | NO           |             |              |             |         |
| TL_IS7_                 | NO           | NO           | <b>YES</b>   | <b>YES</b>   | NO          |              |             |         |
| TL_IS8_                 | NO           | NO           | NO           | NO           | NO          | NO           |             |         |
| TL_IS9_                 | NO           | NO           | NO           | NO           | NO          | <b>YES</b>   | NO          |         |











## Teller Intensive Station Mann Whitney U-Test Results

### Manganese

| n= (top / left / total) | TL_IS2_      | TL_IS3_      | TL_IS4_      | TL_IS5_      | TL_IS6_      | TL_IS7_      | TL_IS8_     | TL_IS9_ |
|-------------------------|--------------|--------------|--------------|--------------|--------------|--------------|-------------|---------|
| TL_IS2_                 |              |              |              |              |              |              |             |         |
| TL_IS3_                 | 8 / 6 / 14   |              |              |              |              |              |             |         |
| TL_IS4_                 | 8 / 7 / 15   | 6 / 7 / 13   |              |              |              |              |             |         |
| TL_IS5_                 | 8 / 10 / 18  | 6 / 10 / 16  | 7 / 10 / 17  |              |              |              |             |         |
| TL_IS6_                 | 8 / 5 / 13   | 6 / 5 / 11   | 7 / 5 / 12   |              |              |              |             |         |
| TL_IS7_                 | 8 / 6 / 14   | 6 / 6 / 12   | 7 / 6 / 13   | 10 / 6 / 16  | 5 / 6 / 11   |              |             |         |
| TL_IS8_                 | 8 / 6 / 14   | 6 / 6 / 12   | 7 / 6 / 13   | 10 / 6 / 16  | 5 / 6 / 11   | 6 / 6 / 12   |             |         |
| TL_IS9_                 | 8 / 10 / 18  | 6 / 10 / 16  | 7 / 10 / 17  | 10 / 10 / 20 | 5 / 10 / 15  | 6 / 10 / 16  | 6 / 10 / 16 |         |
| Σ[Rank] (top / left)    | TL_IS2_      | TL_IS3_      | TL_IS4_      | TL_IS5_      | TL_IS6_      | TL_IS7_      | TL_IS8_     | TL_IS9_ |
| TL_IS2_                 |              |              |              |              |              |              |             |         |
| TL_IS3_                 | 61 / 44      |              |              |              |              |              |             |         |
| TL_IS4_                 | 56 / 64      | 30 / 61      |              |              |              |              |             |         |
| TL_IS5_                 | 83 / 88      | 48 / 88      | 81 / 72      |              |              |              |             |         |
| TL_IS6_                 | 59 / 32      | 31 / 35      | 53 / 25      | 78 / 42      |              |              |             |         |
| TL_IS7_                 | 65.5 / 39.5  | 44 / 34      | 64 / 27      | 96 / 40      | 37 / 29      |              |             |         |
| TL_IS8_                 | 49 / 56      | 29 / 49      | 41 / 50      | 70 / 66      | 21 / 45      | 26 / 52      |             |         |
| TL_IS9_                 | 56 / 115     | 30 / 106     | 54 / 99      | 75 / 135     | 27 / 93      | 28 / 108     | 56 / 80     |         |
| U (top / left)          | TL_IS2_      | TL_IS3_      | TL_IS4_      | TL_IS5_      | TL_IS6_      | TL_IS7_      | TL_IS8_     | TL_IS9_ |
| TL_IS2_                 |              |              |              |              |              |              |             |         |
| TL_IS3_                 | 23 / 25      |              |              |              |              |              |             |         |
| TL_IS4_                 | 36 / 20      | 33 / 9       |              |              |              |              |             |         |
| TL_IS5_                 | 33 / 47      | 33 / 27      | 17 / 53      |              |              |              |             |         |
| TL_IS6_                 | 17 / 23      | 20 / 10      | 10 / 25      | 27 / 23      |              |              |             |         |
| TL_IS7_                 | 18.5 / 29.5  | 13 / 23      | 6 / 36       | 19 / 41      | 8 / 22       |              |             |         |
| TL_IS8_                 | 35 / 13      | 28 / 8       | 29 / 13      | 45 / 15      | 24 / 6       | 31 / 5       |             |         |
| TL_IS9_                 | 60 / 20      | 51 / 9       | 44 / 26      | 80 / 20      | 38 / 12      | 53 / 7       | 25 / 35     |         |
| z                       | TL_IS2_      | TL_IS3_      | TL_IS4_      | TL_IS5_      | TL_IS6_      | TL_IS7_      | TL_IS8_     | TL_IS9_ |
| TL_IS2_                 |              |              |              |              |              |              |             |         |
| TL_IS3_                 | 0.13         |              |              |              |              |              |             |         |
| TL_IS4_                 | 0.93         | 1.71         |              |              |              |              |             |         |
| TL_IS5_                 | 0.62         | 0.33         | 1.76         |              |              |              |             |         |
| TL_IS6_                 | 0.44         | 0.91         | 1.22         | 0.24         |              |              |             |         |
| TL_IS7_                 | 0.71         | 0.80         | <b>2.14</b>  | 1.19         | 1.28         |              |             |         |
| TL_IS8_                 | 1.42         | 1.60         | 1.14         | 1.63         | 1.64         | <b>2.08</b>  |             |         |
| TL_IS9_                 | 1.78         | <b>2.28</b>  | 0.88         | <b>2.27</b>  | 1.59         | <b>2.49</b>  | 0.54        |         |
| ES                      | TL_IS2_      | TL_IS3_      | TL_IS4_      | TL_IS5_      | TL_IS6_      | TL_IS7_      | TL_IS8_     | TL_IS9_ |
| TL_IS2_                 |              |              |              |              |              |              |             |         |
| TL_IS3_                 | 0.01         |              |              |              |              |              |             |         |
| TL_IS4_                 | 0.06         | 0.13         |              |              |              |              |             |         |
| TL_IS5_                 | 0.03         | 0.02         | 0.10         |              |              |              |             |         |
| TL_IS6_                 | 0.03         | 0.08         | 0.10         | 0.02         |              |              |             |         |
| TL_IS7_                 | 0.05         | 0.07         | 0.16         | 0.07         | 0.12         |              |             |         |
| TL_IS8_                 | 0.10         | 0.13         | 0.09         | 0.10         | 0.15         | 0.17         |             |         |
| TL_IS9_                 | 0.10         | 0.14         | 0.05         | 0.11         | 0.11         | 0.16         | 0.03        |         |
| Degree of Association   | TL_IS2_      | TL_IS3_      | TL_IS4_      | TL_IS5_      | TL_IS6_      | TL_IS7_      | TL_IS8_     | TL_IS9_ |
| TL_IS2_                 |              |              |              |              |              |              |             |         |
| TL_IS3_                 | small        |              |              |              |              |              |             |         |
| TL_IS4_                 | small        | small-medium |              |              |              |              |             |         |
| TL_IS5_                 | small        | small        | small-medium |              |              |              |             |         |
| TL_IS6_                 | small        | small        | small-medium | small        |              |              |             |         |
| TL_IS7_                 | small        | small        | small-medium | small        | small-medium |              |             |         |
| TL_IS8_                 | small-medium | small-medium | small        | small-medium | small-medium | small-medium |             |         |
| TL_IS9_                 | small        | small-medium | small        | small-medium | small-medium | small-medium | small       |         |
| Significantly Different | TL_IS2_      | TL_IS3_      | TL_IS4_      | TL_IS5_      | TL_IS6_      | TL_IS7_      | TL_IS8_     | TL_IS9_ |
| TL_IS2_                 |              |              |              |              |              |              |             |         |
| TL_IS3_                 | NO           |              |              |              |              |              |             |         |
| TL_IS4_                 | NO           | NO           |              |              |              |              |             |         |
| TL_IS5_                 | NO           | NO           | NO           |              |              |              |             |         |
| TL_IS6_                 | NO           | NO           | NO           | NO           |              |              |             |         |
| TL_IS7_                 | NO           | NO           | <b>YES</b>   | NO           | NO           |              |             |         |
| TL_IS8_                 | NO           | NO           | NO           | NO           | NO           | <b>YES</b>   |             |         |
| TL_IS9_                 | NO           | <b>YES</b>   | NO           | <b>YES</b>   | NO           | <b>YES</b>   | NO          |         |



# Teller Intensive Station Mann Whitney U-Test Results

## Nitrate

| n= (top / left / total) | TL_IS2_      | TL_IS3_      | TL_IS4_      | TL_IS5_      | TL_IS6_      | TL_IS7_      | TL_IS8_      | TL_IS9_ |
|-------------------------|--------------|--------------|--------------|--------------|--------------|--------------|--------------|---------|
| TL_IS2_                 |              |              |              |              |              |              |              |         |
| TL_IS3_                 | 8 / 6 / 14   |              |              |              |              |              |              |         |
| TL_IS4_                 | 8 / 7 / 15   | 6 / 7 / 13   |              |              |              |              |              |         |
| TL_IS5_                 | 8 / 10 / 18  | 6 / 10 / 16  | 7 / 10 / 17  |              |              |              |              |         |
| TL_IS6_                 | 8 / 5 / 13   | 6 / 5 / 11   | 7 / 5 / 12   |              |              |              |              |         |
| TL_IS7_                 | 8 / 6 / 14   | 6 / 6 / 12   | 7 / 6 / 13   | 10 / 6 / 16  | 5 / 6 / 11   |              |              |         |
| TL_IS8_                 | 8 / 6 / 14   | 6 / 6 / 12   | 7 / 6 / 13   | 10 / 6 / 16  | 5 / 6 / 11   | 6 / 6 / 12   |              |         |
| TL_IS9_                 | 8 / 10 / 18  | 6 / 10 / 16  | 7 / 10 / 17  | 10 / 10 / 20 | 5 / 10 / 15  | 6 / 10 / 16  | 6 / 10 / 16  |         |
| Σ[Rank] (top / left)    | TL_IS2_      | TL_IS3_      | TL_IS4_      | TL_IS5_      | TL_IS6_      | TL_IS7_      | TL_IS8_      | TL_IS9_ |
| TL_IS2_                 |              |              |              |              |              |              |              |         |
| TL_IS3_                 | 63 / 42      |              |              |              |              |              |              |         |
| TL_IS4_                 | 79.5 / 40.5  | 55 / 36      |              |              |              |              |              |         |
| TL_IS5_                 | 79.5 / 91.5  | 52 / 84      | 46.5 / 106.5 |              |              |              |              |         |
| TL_IS6_                 | 69 / 22      | 46 / 20      | 46 / 32      | 95 / 25      |              |              |              |         |
| TL_IS7_                 | 39 / 66      | 23 / 55      | 28 / 63      | 57 / 79      | 15 / 51      |              |              |         |
| TL_IS8_                 | 76.5 / 28.5  | 52 / 26      | 53.5 / 37.5  | 104.5 / 31.5 | 31 / 35      | 57 / 21      |              |         |
| TL_IS9_                 | 85 / 86      | 58 / 78      | 48 / 105     | 115 / 95     | 24 / 96      | 81 / 55      | 33 / 103     |         |
| U (top / left)          | TL_IS2_      | TL_IS3_      | TL_IS4_      | TL_IS5_      | TL_IS6_      | TL_IS7_      | TL_IS8_      | TL_IS9_ |
| TL_IS2_                 |              |              |              |              |              |              |              |         |
| TL_IS3_                 | 21 / 27      |              |              |              |              |              |              |         |
| TL_IS4_                 | 12.5 / 43.5  | 8 / 34       |              |              |              |              |              |         |
| TL_IS5_                 | 36.5 / 43.5  | 29 / 31      | 51.5 / 18.5  |              |              |              |              |         |
| TL_IS6_                 | 7 / 33       | 5 / 25       | 17 / 18      | 10 / 40      |              |              |              |         |
| TL_IS7_                 | 45 / 3       | 34 / 2       | 42 / 0       | 58 / 2       | 30 / 0       |              |              |         |
| TL_IS8_                 | 7.5 / 40.5   | 5 / 31       | 16.5 / 25.5  | 10.5 / 49.5  | 14 / 16      | 0 / 36       |              |         |
| TL_IS9_                 | 31 / 49      | 23 / 37      | 50 / 20      | 40 / 60      | 41 / 9       | 0 / 60       | 48 / 12      |         |
| z                       | TL_IS2_      | TL_IS3_      | TL_IS4_      | TL_IS5_      | TL_IS6_      | TL_IS7_      | TL_IS8_      | TL_IS9_ |
| TL_IS2_                 |              |              |              |              |              |              |              |         |
| TL_IS3_                 | 0.39         |              |              |              |              |              |              |         |
| TL_IS4_                 | 1.79         | 1.86         |              |              |              |              |              |         |
| TL_IS5_                 | 0.31         | 0.11         | 1.61         |              |              |              |              |         |
| TL_IS6_                 | 1.90         | 1.83         | 0.08         | 1.84         |              |              |              |         |
| TL_IS7_                 | <b>2.71</b>  | <b>2.56</b>  | <b>3.00</b>  | <b>3.04</b>  | <b>2.74</b>  |              |              |         |
| TL_IS8_                 | <b>2.13</b>  | <b>2.08</b>  | 0.64         | <b>2.12</b>  | 0.18         | <b>2.88</b>  |              |         |
| TL_IS9_                 | 0.80         | 0.76         | 1.46         | 0.76         | 1.96         | <b>3.25</b>  | 1.95         |         |
| ES                      | TL_IS2_      | TL_IS3_      | TL_IS4_      | TL_IS5_      | TL_IS6_      | TL_IS7_      | TL_IS8_      | TL_IS9_ |
| TL_IS2_                 |              |              |              |              |              |              |              |         |
| TL_IS3_                 | 0.03         |              |              |              |              |              |              |         |
| TL_IS4_                 | 0.12         | 0.14         |              |              |              |              |              |         |
| TL_IS5_                 | 0.02         | 0.01         | 0.09         |              |              |              |              |         |
| TL_IS6_                 | 0.15         | 0.17         | 0.01         | 0.12         |              |              |              |         |
| TL_IS7_                 | 0.19         | 0.21         | 0.23         | 0.19         | 0.25         |              |              |         |
| TL_IS8_                 | 0.15         | 0.17         | 0.05         | 0.13         | 0.02         | 0.24         |              |         |
| TL_IS9_                 | 0.04         | 0.05         | 0.09         | 0.04         | 0.13         | 0.20         | 0.12         |         |
| Degree of Association   | TL_IS2_      | TL_IS3_      | TL_IS4_      | TL_IS5_      | TL_IS6_      | TL_IS7_      | TL_IS8_      | TL_IS9_ |
| TL_IS2_                 |              |              |              |              |              |              |              |         |
| TL_IS3_                 | small        |              |              |              |              |              |              |         |
| TL_IS4_                 | small-medium | small-medium |              |              |              |              |              |         |
| TL_IS5_                 | small        | small        | small        |              |              |              |              |         |
| TL_IS6_                 | small-medium | small-medium | small        | small-medium |              |              |              |         |
| TL_IS7_                 | small-medium | small-medium | small-medium | small-medium | small-medium |              |              |         |
| TL_IS8_                 | small-medium | small-medium | small        | small-medium | small        | small-medium |              |         |
| TL_IS9_                 | small        | small        | small        | small        | small-medium | small-medium | small-medium |         |
| Significantly Different | TL_IS2_      | TL_IS3_      | TL_IS4_      | TL_IS5_      | TL_IS6_      | TL_IS7_      | TL_IS8_      | TL_IS9_ |
| TL_IS2_                 |              |              |              |              |              |              |              |         |
| TL_IS3_                 | NO           |              |              |              |              |              |              |         |
| TL_IS4_                 | NO           | NO           |              |              |              |              |              |         |
| TL_IS5_                 | NO           | NO           | NO           |              |              |              |              |         |
| TL_IS6_                 | NO           | NO           | NO           | NO           |              |              |              |         |
| TL_IS7_                 | <b>YES</b>   | <b>YES</b>   | <b>YES</b>   | <b>YES</b>   | <b>YES</b>   |              |              |         |
| TL_IS8_                 | <b>YES</b>   | <b>YES</b>   | NO           | <b>YES</b>   | NO           | <b>YES</b>   |              |         |
| TL_IS9_                 | NO           | NO           | NO           | NO           | NO           | <b>YES</b>   | NO           |         |



















## Teller Intensive Station Mann Whitney U-Test Results

### Titanium

| n= (top / left / total) | TL_IS2_      | TL_IS3_      | TL_IS4_      | TL_IS5_      | TL_IS6_      | TL_IS7_     | TL_IS8_     | TL_IS9_ |
|-------------------------|--------------|--------------|--------------|--------------|--------------|-------------|-------------|---------|
| TL_IS2_                 |              |              |              |              |              |             |             |         |
| TL_IS3_                 | 8 / 6 / 14   |              |              |              |              |             |             |         |
| TL_IS4_                 | 8 / 7 / 15   | 6 / 7 / 13   |              |              |              |             |             |         |
| TL_IS5_                 | 8 / 10 / 18  | 6 / 10 / 16  | 7 / 10 / 17  |              |              |             |             |         |
| TL_IS6_                 | 8 / 5 / 13   | 6 / 5 / 11   | 7 / 5 / 12   |              |              |             |             |         |
| TL_IS7_                 | 8 / 6 / 14   | 6 / 6 / 12   | 7 / 6 / 13   | 10 / 6 / 16  | 5 / 6 / 11   |             |             |         |
| TL_IS8_                 | 8 / 6 / 14   | 6 / 6 / 12   | 7 / 6 / 13   | 10 / 6 / 16  | 5 / 6 / 11   | 6 / 6 / 12  |             |         |
| TL_IS9_                 | 8 / 10 / 18  | 6 / 10 / 16  | 7 / 10 / 17  | 10 / 10 / 20 | 5 / 10 / 15  | 6 / 10 / 16 | 6 / 10 / 16 |         |
| Σ[Rank] (top / left)    | TL_IS2_      | TL_IS3_      | TL_IS4_      | TL_IS5_      | TL_IS6_      | TL_IS7_     | TL_IS8_     | TL_IS9_ |
| TL_IS2_                 |              |              |              |              |              |             |             |         |
| TL_IS3_                 | 69.5 / 35.5  |              |              |              |              |             |             |         |
| TL_IS4_                 | 52 / 68      | 28 / 63      |              |              |              |             |             |         |
| TL_IS5_                 | 93.5 / 77.5  | 51.5 / 84.5  | 93 / 60      |              |              |             |             |         |
| TL_IS6_                 | 66 / 25      | 41 / 25      | 57 / 21      | 86 / 34      |              |             |             |         |
| TL_IS7_                 | 69.5 / 35.5  | 40.5 / 37.5  | 60 / 31      | 86.5 / 49.5  | 29 / 37      |             |             |         |
| TL_IS8_                 | 80 / 25      | 52 / 26      | 70 / 21      | 103 / 33     | 37 / 29      | 45 / 33     |             |         |
| TL_IS9_                 | 103.5 / 67.5 | 67.5 / 68.5  | 92 / 61      | 126.5 / 83.5 | 45 / 75      | 59.5 / 76.5 | 49 / 87     |         |
| U (top / left)          | TL_IS2_      | TL_IS3_      | TL_IS4_      | TL_IS5_      | TL_IS6_      | TL_IS7_     | TL_IS8_     | TL_IS9_ |
| TL_IS2_                 |              |              |              |              |              |             |             |         |
| TL_IS3_                 | 14.5 / 33.5  |              |              |              |              |             |             |         |
| TL_IS4_                 | 40 / 16      | 35 / 7       |              |              |              |             |             |         |
| TL_IS5_                 | 22.5 / 57.5  | 29.5 / 30.5  | 5 / 65       |              |              |             |             |         |
| TL_IS6_                 | 10 / 30      | 10 / 20      | 6 / 29       | 19 / 31      |              |             |             |         |
| TL_IS7_                 | 14.5 / 33.5  | 16.5 / 19.5  | 10 / 32      | 28.5 / 31.5  | 16 / 14      |             |             |         |
| TL_IS8_                 | 4 / 44       | 5 / 31       | 0 / 42       | 12 / 48      | 8 / 22       | 12 / 24     |             |         |
| TL_IS9_                 | 12.5 / 67.5  | 13.5 / 46.5  | 6 / 64       | 28.5 / 71.5  | 20 / 30      | 21.5 / 38.5 | 32 / 28     |         |
| z                       | TL_IS2_      | TL_IS3_      | TL_IS4_      | TL_IS5_      | TL_IS6_      | TL_IS7_     | TL_IS8_     | TL_IS9_ |
| TL_IS2_                 |              |              |              |              |              |             |             |         |
| TL_IS3_                 | 1.23         |              |              |              |              |             |             |         |
| TL_IS4_                 | 1.39         | <b>2.00</b>  |              |              |              |             |             |         |
| TL_IS5_                 | 1.55         | 0.05         | <b>2.93</b>  |              |              |             |             |         |
| TL_IS6_                 | 1.46         | 0.91         | 1.87         | 0.73         |              |             |             |         |
| TL_IS7_                 | 1.23         | 0.24         | 1.57         | 0.16         | 0.18         |             |             |         |
| TL_IS8_                 | <b>2.58</b>  | <b>2.08</b>  | <b>3.00</b>  | 1.95         | 1.28         | 0.96        |             |         |
| TL_IS9_                 | <b>2.44</b>  | 1.79         | <b>2.83</b>  | 1.63         | 0.61         | 0.92        | 0.22        |         |
| ES                      | TL_IS2_      | TL_IS3_      | TL_IS4_      | TL_IS5_      | TL_IS6_      | TL_IS7_     | TL_IS8_     | TL_IS9_ |
| TL_IS2_                 |              |              |              |              |              |             |             |         |
| TL_IS3_                 | 0.09         |              |              |              |              |             |             |         |
| TL_IS4_                 | 0.09         | 0.15         |              |              |              |             |             |         |
| TL_IS5_                 | 0.09         | 0.00         | 0.17         |              |              |             |             |         |
| TL_IS6_                 | 0.11         | 0.08         | 0.16         | 0.05         |              |             |             |         |
| TL_IS7_                 | 0.09         | 0.02         | 0.12         | 0.01         | 0.02         |             |             |         |
| TL_IS8_                 | 0.18         | 0.17         | 0.23         | 0.12         | 0.12         | 0.08        |             |         |
| TL_IS9_                 | 0.14         | 0.11         | 0.17         | 0.08         | 0.04         | 0.06        | 0.01        |         |
| Degree of Association   | TL_IS2_      | TL_IS3_      | TL_IS4_      | TL_IS5_      | TL_IS6_      | TL_IS7_     | TL_IS8_     | TL_IS9_ |
| TL_IS2_                 |              |              |              |              |              |             |             |         |
| TL_IS3_                 | small        |              |              |              |              |             |             |         |
| TL_IS4_                 | small        | small-medium |              |              |              |             |             |         |
| TL_IS5_                 | small        | small        | small-medium |              |              |             |             |         |
| TL_IS6_                 | small-medium | small        | small-medium | small        |              |             |             |         |
| TL_IS7_                 | small        | small        | small-medium | small        | small        |             |             |         |
| TL_IS8_                 | small-medium | small-medium | small-medium | small-medium | small-medium | small       |             |         |
| TL_IS9_                 | small-medium | small-medium | small-medium | small        | small        | small       | small       |         |
| Significantly Different | TL_IS2_      | TL_IS3_      | TL_IS4_      | TL_IS5_      | TL_IS6_      | TL_IS7_     | TL_IS8_     | TL_IS9_ |
| TL_IS2_                 |              |              |              |              |              |             |             |         |
| TL_IS3_                 | NO           |              |              |              |              |             |             |         |
| TL_IS4_                 | NO           | <b>YES</b>   |              |              |              |             |             |         |
| TL_IS5_                 | NO           | NO           | <b>YES</b>   |              |              |             |             |         |
| TL_IS6_                 | NO           | NO           | NO           | NO           |              |             |             |         |
| TL_IS7_                 | NO           | NO           | NO           | NO           | NO           |             |             |         |
| TL_IS8_                 | <b>YES</b>   | <b>YES</b>   | <b>YES</b>   | NO           | NO           | NO          |             |         |
| TL_IS9_                 | <b>YES</b>   | NO           | <b>YES</b>   | NO           | NO           | NO          | NO          |         |

# Teller Intensive Station Mann Whitney U-Test Results

## Zinc

| n= (top / left / total) | TL_IS2_      | TL_IS3_      | TL_IS4_     | TL_IS5_      | TL_IS6_      | TL_IS7_      | TL_IS8_      | TL_IS9_ |
|-------------------------|--------------|--------------|-------------|--------------|--------------|--------------|--------------|---------|
| TL_IS2_                 |              |              |             |              |              |              |              |         |
| TL_IS3_                 | 8 / 6 / 14   |              |             |              |              |              |              |         |
| TL_IS4_                 | 8 / 7 / 15   | 6 / 7 / 13   |             |              |              |              |              |         |
| TL_IS5_                 | 8 / 10 / 18  | 6 / 10 / 16  | 7 / 10 / 17 |              |              |              |              |         |
| TL_IS6_                 | 8 / 5 / 13   | 6 / 5 / 11   | 7 / 5 / 12  |              |              |              |              |         |
| TL_IS7_                 | 8 / 6 / 14   | 6 / 6 / 12   | 7 / 6 / 13  | 10 / 6 / 16  | 5 / 6 / 11   |              |              |         |
| TL_IS8_                 | 8 / 6 / 14   | 6 / 6 / 12   | 7 / 6 / 13  | 10 / 6 / 16  | 5 / 6 / 11   | 6 / 6 / 12   |              |         |
| TL_IS9_                 | 8 / 10 / 18  | 6 / 10 / 16  | 7 / 10 / 17 | 10 / 10 / 20 | 5 / 10 / 15  | 6 / 10 / 16  | 6 / 10 / 16  |         |
| Σ[Rank] (top / left)    | TL_IS2_      | TL_IS3_      | TL_IS4_     | TL_IS5_      | TL_IS6_      | TL_IS7_      | TL_IS8_      | TL_IS9_ |
| TL_IS2_                 |              |              |             |              |              |              |              |         |
| TL_IS3_                 | 63 / 42      |              |             |              |              |              |              |         |
| TL_IS4_                 | 69 / 51      | 42 / 49      |             |              |              |              |              |         |
| TL_IS5_                 | 84 / 87      | 51 / 85      | 61 / 92     |              |              |              |              |         |
| TL_IS6_                 | 60 / 31      | 37 / 29      | 46 / 32     | 81 / 39      |              |              |              |         |
| TL_IS7_                 | 61 / 44      | 38 / 40      | 47 / 44     | 81 / 55      | 29 / 37      |              |              |         |
| TL_IS8_                 | 65 / 40      | 42 / 36      | 49 / 42     | 87 / 49      | 30 / 36      | 42 / 36      |              |         |
| TL_IS9_                 | 103 / 68     | 72 / 64      | 77 / 76     | 138 / 72     | 55 / 65      | 72 / 64      | 70 / 66      |         |
| U (top / left)          | TL_IS2_      | TL_IS3_      | TL_IS4_     | TL_IS5_      | TL_IS6_      | TL_IS7_      | TL_IS8_      | TL_IS9_ |
| TL_IS2_                 |              |              |             |              |              |              |              |         |
| TL_IS3_                 | 21 / 27      |              |             |              |              |              |              |         |
| TL_IS4_                 | 23 / 33      | 21 / 21      |             |              |              |              |              |         |
| TL_IS5_                 | 32 / 48      | 30 / 30      | 37 / 33     |              |              |              |              |         |
| TL_IS6_                 | 16 / 24      | 14 / 16      | 17 / 18     | 24 / 26      |              |              |              |         |
| TL_IS7_                 | 23 / 25      | 19 / 17      | 23 / 19     | 34 / 26      | 16 / 14      |              |              |         |
| TL_IS8_                 | 19 / 29      | 15 / 21      | 21 / 21     | 28 / 32      | 15 / 15      | 15 / 21      |              |         |
| TL_IS9_                 | 13 / 67      | 9 / 51       | 21 / 49     | 17 / 83      | 10 / 40      | 9 / 51       | 11 / 49      |         |
| z                       | TL_IS2_      | TL_IS3_      | TL_IS4_     | TL_IS5_      | TL_IS6_      | TL_IS7_      | TL_IS8_      | TL_IS9_ |
| TL_IS2_                 |              |              |             |              |              |              |              |         |
| TL_IS3_                 | 0.39         |              |             |              |              |              |              |         |
| TL_IS4_                 | 0.58         | 0.00         |             |              |              |              |              |         |
| TL_IS5_                 | 0.71         | 0.00         | 0.20        |              |              |              |              |         |
| TL_IS6_                 | 0.59         | 0.18         | 0.08        | 0.12         |              |              |              |         |
| TL_IS7_                 | 0.13         | 0.16         | 0.29        | 0.43         | 0.18         |              |              |         |
| TL_IS8_                 | 0.65         | 0.48         | 0.00        | 0.22         | 0.00         | 0.48         |              |         |
| TL_IS9_                 | <b>2.40</b>  | <b>2.28</b>  | 1.37        | <b>2.49</b>  | 1.84         | <b>2.28</b>  | <b>2.06</b>  |         |
| ES                      | TL_IS2_      | TL_IS3_      | TL_IS4_     | TL_IS5_      | TL_IS6_      | TL_IS7_      | TL_IS8_      | TL_IS9_ |
| TL_IS2_                 |              |              |             |              |              |              |              |         |
| TL_IS3_                 | 0.03         |              |             |              |              |              |              |         |
| TL_IS4_                 | 0.04         | 0.00         |             |              |              |              |              |         |
| TL_IS5_                 | 0.04         | 0.00         | 0.01        |              |              |              |              |         |
| TL_IS6_                 | 0.05         | 0.02         | 0.01        | 0.01         |              |              |              |         |
| TL_IS7_                 | 0.01         | 0.01         | 0.02        | 0.03         | 0.02         |              |              |         |
| TL_IS8_                 | 0.05         | 0.04         | 0.00        | 0.01         | 0.00         | 0.04         |              |         |
| TL_IS9_                 | 0.13         | 0.14         | 0.08        | 0.12         | 0.12         | 0.14         | 0.13         |         |
| Degree of Association   | TL_IS2_      | TL_IS3_      | TL_IS4_     | TL_IS5_      | TL_IS6_      | TL_IS7_      | TL_IS8_      | TL_IS9_ |
| TL_IS2_                 |              |              |             |              |              |              |              |         |
| TL_IS3_                 | small        |              |             |              |              |              |              |         |
| TL_IS4_                 | small        | small        |             |              |              |              |              |         |
| TL_IS5_                 | small        | small        | small       |              |              |              |              |         |
| TL_IS6_                 | small        | small        | small       | small        |              |              |              |         |
| TL_IS7_                 | small        | small        | small       | small        | small        |              |              |         |
| TL_IS8_                 | small        | small        | small       | small        | small        | small        |              |         |
| TL_IS9_                 | small-medium | small-medium | small       | small-medium | small-medium | small-medium | small-medium |         |
| Significantly Different | TL_IS2_      | TL_IS3_      | TL_IS4_     | TL_IS5_      | TL_IS6_      | TL_IS7_      | TL_IS8_      | TL_IS9_ |
| TL_IS2_                 |              |              |             |              |              |              |              |         |
| TL_IS3_                 | NO           |              |             |              |              |              |              |         |
| TL_IS4_                 | NO           | NO           |             |              |              |              |              |         |
| TL_IS5_                 | NO           | NO           | NO          |              |              |              |              |         |
| TL_IS6_                 | NO           | NO           | NO          | NO           |              |              |              |         |
| TL_IS7_                 | NO           | NO           | NO          | NO           | NO           |              |              |         |
| TL_IS8_                 | NO           | NO           | NO          | NO           | NO           | NO           |              |         |
| TL_IS9_                 | <b>YES</b>   | <b>YES</b>   | NO          | <b>YES</b>   | NO           | <b>YES</b>   | <b>YES</b>   |         |

# Kougarok Intensive Station Mann Whitney U-Test Results

## Aluminum

| n= (top / left / total) | KG_IS1_      | KG_IS2_       | KG_IS3_         | KG_IS5_      | KG_IS6_      | KG_IS7_      | KG_IS10_     | KG_IS11_      | KG_IS12_     | KG_IS13_ |
|-------------------------|--------------|---------------|-----------------|--------------|--------------|--------------|--------------|---------------|--------------|----------|
| KG_IS1_                 |              |               |                 |              |              |              |              |               |              |          |
| KG_IS2_                 | 17 / 64 / 81 |               |                 |              |              |              |              |               |              |          |
| KG_IS3_                 | 17 / 25 / 42 | 64 / 25 / 89  |                 |              |              |              |              |               |              |          |
| KG_IS5_                 | 17 / 3 / 20  | 64 / 3 / 67   | 25 / 3 / 28     |              |              |              |              |               |              |          |
| KG_IS6_                 | 17 / 7 / 24  | 64 / 7 / 71   | 25 / 7 / 32     |              |              |              |              |               |              |          |
| KG_IS7_                 | 17 / 7 / 24  | 64 / 7 / 71   | 25 / 7 / 32     | 3 / 7 / 10   | 7 / 7 / 14   |              |              |               |              |          |
| KG_IS10_                | 17 / 10 / 27 | 64 / 10 / 74  | 25 / 10 / 35    | 3 / 10 / 13  | 7 / 10 / 17  | 7 / 10 / 17  |              |               |              |          |
| KG_IS11_                | 17 / 73 / 90 | 64 / 73 / 137 | 25 / 73 / 98    | 3 / 73 / 76  | 7 / 73 / 80  | 7 / 73 / 80  | 10 / 73 / 83 |               |              |          |
| KG_IS12_                | 17 / 54 / 71 | 64 / 54 / 118 | 25 / 54 / 79    | 3 / 54 / 57  | 7 / 54 / 61  | 7 / 54 / 61  | 10 / 54 / 64 | 73 / 54 / 127 |              |          |
| KG_IS13_                | 17 / 12 / 29 | 64 / 12 / 76  | 25 / 12 / 37    | 3 / 12 / 15  | 7 / 12 / 19  | 7 / 12 / 19  | 10 / 12 / 22 | 73 / 12 / 85  | 54 / 12 / 66 |          |
| Σ[Rank] (top / left)    | KG_IS1_      | KG_IS2_       | KG_IS3_         | KG_IS5_      | KG_IS6_      | KG_IS7_      | KG_IS10_     | KG_IS11_      | KG_IS12_     | KG_IS13_ |
| KG_IS1_                 |              |               |                 |              |              |              |              |               |              |          |
| KG_IS2_                 | 1114 / 2207  |               |                 |              |              |              |              |               |              |          |
| KG_IS3_                 | 382 / 521    | 2292 / 1713   |                 |              |              |              |              |               |              |          |
| KG_IS5_                 | 200 / 10     | 2190 / 88     | 394 / 12        |              |              |              |              |               |              |          |
| KG_IS6_                 | 249 / 51     | 2247 / 309    | 459 / 69        | 12 / 43      |              |              |              |               |              |          |
| KG_IS7_                 | 236 / 64     | 2177 / 379    | 440 / 88        | 8 / 47       | 47 / 58      |              |              |               |              |          |
| KG_IS10_                | 249 / 129    | 2111 / 664    | 445 / 185       | 6 / 85       | 38 / 115     | 46 / 107     |              |               |              |          |
| KG_IS11_                | 811 / 3284   | 2430 / 7023   | 1163.5 / 3687.5 | 10 / 2916    | 103 / 3137   | 158 / 3082   | 373 / 3113   |               |              |          |
| KG_IS12_                | 537 / 2019   | 2272 / 4749   | 806 / 2354      | 10 / 1643    | 62 / 1829    | 90 / 1801    | 214 / 1866   | 4111 / 4017   |              |          |
| KG_IS13_                | 262 / 173    | 2106 / 820    | 453 / 250       | 6 / 114      | 36 / 154     | 46 / 144     | 96 / 157     | 3097 / 558    | 1892 / 319   |          |
| U (top / left)          | KG_IS1_      | KG_IS2_       | KG_IS3_         | KG_IS5_      | KG_IS6_      | KG_IS7_      | KG_IS10_     | KG_IS11_      | KG_IS12_     | KG_IS13_ |
| KG_IS1_                 |              |               |                 |              |              |              |              |               |              |          |
| KG_IS2_                 | 127 / 961    |               |                 |              |              |              |              |               |              |          |
| KG_IS3_                 | 196 / 229    | 1388 / 212    |                 |              |              |              |              |               |              |          |
| KG_IS5_                 | 4 / 47       | 82 / 110      | 6 / 69          |              |              |              |              |               |              |          |
| KG_IS6_                 | 23 / 96      | 281 / 167     | 41 / 134        | 15 / 6       |              |              |              |               |              |          |
| KG_IS7_                 | 36 / 83      | 351 / 97      | 60 / 115        | 19 / 2       | 30 / 19      |              |              |               |              |          |
| KG_IS10_                | 74 / 96      | 609 / 31      | 130 / 120       | 30 / 0       | 60 / 10      | 52 / 18      |              |               |              |          |
| KG_IS11_                | 583 / 658    | 4322 / 350    | 986.5 / 838.5   | 215 / 4      | 436 / 75     | 381 / 130    | 412 / 318    |               |              |          |
| KG_IS12_                | 534 / 384    | 3264 / 192    | 869 / 481       | 158 / 4      | 344 / 34     | 316 / 62     | 381 / 159    | 2532 / 1410   |              |          |
| KG_IS13_                | 95 / 109     | 742 / 26      | 172 / 128       | 36 / 0       | 76 / 8       | 66 / 18      | 79 / 41      | 480 / 396     | 241 / 407    |          |
| z                       | KG_IS1_      | KG_IS2_       | KG_IS3_         | KG_IS5_      | KG_IS6_      | KG_IS7_      | KG_IS10_     | KG_IS11_      | KG_IS12_     | KG_IS13_ |
| KG_IS1_                 |              |               |                 |              |              |              |              |               |              |          |
| KG_IS2_                 | 4.84         |               |                 |              |              |              |              |               |              |          |
| KG_IS3_                 | 0.42         | 5.37          |                 |              |              |              |              |               |              |          |
| KG_IS5_                 | 2.28         | 0.42          | 2.34            |              |              |              |              |               |              |          |
| KG_IS6_                 | 2.32         | 1.10          | 2.12            | 1.03         |              |              |              |               |              |          |
| KG_IS7_                 | 1.49         | 2.45          | 1.25            | 1.94         | 0.70         |              |              |               |              |          |
| KG_IS10_                | 0.55         | 4.57          | 0.18            | 2.54         | 2.44         | 1.66         |              |               |              |          |
| KG_IS11_                | 0.39         | 8.57          | 0.60            | 2.81         | 3.07         | 2.14         | 0.66         |               |              |          |
| KG_IS12_                | 1.01         | 8.30          | 2.04            | 2.75         | 3.51         | 2.87         | 2.05         | 2.74          |              |          |
| KG_IS13_                | 0.31         | 5.10          | 0.71            | 2.60         | 2.87         | 2.03         | 1.25         | 0.53          | 1.38         |          |
| ES                      | KG_IS1_      | KG_IS2_       | KG_IS3_         | KG_IS5_      | KG_IS6_      | KG_IS7_      | KG_IS10_     | KG_IS11_      | KG_IS12_     | KG_IS13_ |
| KG_IS1_                 |              |               |                 |              |              |              |              |               |              |          |
| KG_IS2_                 | 0.06         |               |                 |              |              |              |              |               |              |          |
| KG_IS3_                 | 0.01         | 0.06          |                 |              |              |              |              |               |              |          |
| KG_IS5_                 | 0.11         | 0.01          | 0.08            |              |              |              |              |               |              |          |
| KG_IS6_                 | 0.10         | 0.02          | 0.07            | 0.10         |              |              |              |               |              |          |
| KG_IS7_                 | 0.06         | 0.03          | 0.04            | 0.19         | 0.05         |              |              |               |              |          |
| KG_IS10_                | 0.02         | 0.06          | 0.01            | 0.20         | 0.14         | 0.10         |              |               |              |          |
| KG_IS11_                | 0.00         | 0.06          | 0.01            | 0.04         | 0.04         | 0.03         | 0.01         |               |              |          |
| KG_IS12_                | 0.01         | 0.07          | 0.03            | 0.05         | 0.06         | 0.05         | 0.03         | 0.02          |              |          |
| KG_IS13_                | 0.01         | 0.07          | 0.02            | 0.17         | 0.15         | 0.11         | 0.06         | 0.01          | 0.02         |          |
| Degree of Association   | KG_IS1_      | KG_IS2_       | KG_IS3_         | KG_IS5_      | KG_IS6_      | KG_IS7_      | KG_IS10_     | KG_IS11_      | KG_IS12_     | KG_IS13_ |
| KG_IS1_                 |              |               |                 |              |              |              |              |               |              |          |
| KG_IS2_                 | small        |               |                 |              |              |              |              |               |              |          |
| KG_IS3_                 | small        | small         |                 |              |              |              |              |               |              |          |
| KG_IS5_                 | small-medium | small         | small           |              |              |              |              |               |              |          |
| KG_IS6_                 | small        | small         | small           | small-medium |              |              |              |               |              |          |
| KG_IS7_                 | small        | small         | small           | small-medium | small        |              |              |               |              |          |
| KG_IS10_                | small        | small         | small           | small-medium | small-medium | small        |              |               |              |          |
| KG_IS11_                | small        | small         | small           | small        | small        | small        | small        |               |              |          |
| KG_IS12_                | small        | small         | small           | small        | small        | small        | small        | small         |              |          |
| KG_IS13_                | small        | small         | small           | small-medium | small-medium | small-medium | small        | small         | small        |          |
| Significantly Different | KG_IS1_      | KG_IS2_       | KG_IS3_         | KG_IS5_      | KG_IS6_      | KG_IS7_      | KG_IS10_     | KG_IS11_      | KG_IS12_     | KG_IS13_ |
| KG_IS1_                 |              |               |                 |              |              |              |              |               |              |          |
| KG_IS2_                 | YES          |               |                 |              |              |              |              |               |              |          |
| KG_IS3_                 | NO           | YES           |                 |              |              |              |              |               |              |          |
| KG_IS5_                 | YES          | NO            | YES             |              |              |              |              |               |              |          |
| KG_IS6_                 | YES          | NO            | YES             | NO           |              |              |              |               |              |          |
| KG_IS7_                 | NO           | YES           | NO              | NO           | NO           |              |              |               |              |          |
| KG_IS10_                | NO           | YES           | NO              | YES          | YES          | NO           |              |               |              |          |
| KG_IS11_                | NO           | YES           | NO              | YES          | YES          | YES          |              |               |              |          |
| KG_IS12_                | NO           | YES           | YES             | YES          | YES          | YES          | NO           | YES           |              |          |
| KG_IS13_                | NO           | YES           | NO              | YES          | YES          | YES          | NO           | NO            | NO           |          |

# Kougarok Intensive Station Mann Whitney U-Test Results

## Barium

| n= (top / left / total) | KG_IS1_      | KG_IS2_       | KG_IS3_      | KG_IS5_      | KG_IS6_     | KG_IS7_     | KG_IS10_     | KG_IS11_      | KG_IS12_     | KG_IS13_ |
|-------------------------|--------------|---------------|--------------|--------------|-------------|-------------|--------------|---------------|--------------|----------|
| KG_IS1_                 |              |               |              |              |             |             |              |               |              |          |
| KG_IS2_                 | 17 / 64 / 81 |               |              |              |             |             |              |               |              |          |
| KG_IS3_                 | 17 / 25 / 42 | 64 / 25 / 89  |              |              |             |             |              |               |              |          |
| KG_IS5_                 | 17 / 3 / 20  | 64 / 3 / 67   | 25 / 3 / 28  |              |             |             |              |               |              |          |
| KG_IS6_                 | 17 / 7 / 24  | 64 / 7 / 71   | 25 / 7 / 32  |              |             |             |              |               |              |          |
| KG_IS7_                 | 17 / 7 / 24  | 64 / 7 / 71   | 25 / 7 / 32  | 3 / 7 / 10   | 7 / 7 / 14  |             |              |               |              |          |
| KG_IS10_                | 17 / 10 / 27 | 64 / 10 / 74  | 25 / 10 / 35 | 3 / 10 / 13  | 7 / 10 / 17 | 7 / 10 / 17 |              |               |              |          |
| KG_IS11_                | 17 / 73 / 90 | 64 / 73 / 137 | 25 / 73 / 98 | 3 / 73 / 76  | 7 / 73 / 80 | 7 / 73 / 80 | 10 / 73 / 83 |               |              |          |
| KG_IS12_                | 17 / 54 / 71 | 64 / 54 / 118 | 25 / 54 / 79 | 3 / 54 / 57  | 7 / 54 / 61 | 7 / 54 / 61 | 10 / 54 / 64 | 73 / 54 / 127 |              |          |
| KG_IS13_                | 17 / 12 / 29 | 64 / 12 / 76  | 25 / 12 / 37 | 3 / 12 / 15  | 7 / 12 / 19 | 7 / 12 / 19 | 10 / 12 / 22 | 73 / 12 / 85  | 54 / 12 / 66 |          |
| Σ[Rank] (top / left)    | KG_IS1_      | KG_IS2_       | KG_IS3_      | KG_IS5_      | KG_IS6_     | KG_IS7_     | KG_IS10_     | KG_IS11_      | KG_IS12_     | KG_IS13_ |
| KG_IS1_                 |              |               |              |              |             |             |              |               |              |          |
| KG_IS2_                 | 666 / 2655   |               |              |              |             |             |              |               |              |          |
| KG_IS3_                 | 318 / 585    | 2674 / 1331   |              |              |             |             |              |               |              |          |
| KG_IS5_                 | 167 / 43     | 2150 / 128    | 359 / 47     |              |             |             |              |               |              |          |
| KG_IS6_                 | 224 / 76     | 2343 / 213    | 443 / 85     | 22 / 33      |             |             |              |               |              |          |
| KG_IS7_                 | 231 / 69     | 2384 / 172    | 452 / 76     | 22 / 33      | 56 / 49     |             |              |               |              |          |
| KG_IS10_                | 242 / 136    | 2465 / 310    | 484 / 146    | 26 / 65      | 58 / 95     | 53 / 100    |              |               |              |          |
| KG_IS11_                | 727 / 3368   | 4305 / 5148   | 1440 / 3411  | 143 / 2783   | 227 / 3013  | 181 / 3059  | 328 / 3158   |               |              |          |
| KG_IS12_                | 459 / 2097   | 3240 / 3781   | 974 / 2186   | 90 / 1563    | 136 / 1755  | 115 / 1776  | 202 / 1878   | 4120 / 4008   |              |          |
| KG_IS13_                | 251 / 184    | 2479 / 447    | 513 / 190    | 29 / 91      | 64 / 126    | 56 / 134    | 106 / 147    | 3189 / 466    | 1933 / 278   |          |
| U (top / left)          | KG_IS1_      | KG_IS2_       | KG_IS3_      | KG_IS5_      | KG_IS6_     | KG_IS7_     | KG_IS10_     | KG_IS11_      | KG_IS12_     | KG_IS13_ |
| KG_IS1_                 |              |               |              |              |             |             |              |               |              |          |
| KG_IS2_                 | 575 / 513    |               |              |              |             |             |              |               |              |          |
| KG_IS3_                 | 260 / 165    | 1006 / 594    |              |              |             |             |              |               |              |          |
| KG_IS5_                 | 37 / 14      | 122 / 70      | 41 / 34      |              |             |             |              |               |              |          |
| KG_IS6_                 | 48 / 71      | 185 / 263     | 57 / 118     | 5 / 16       |             |             |              |               |              |          |
| KG_IS7_                 | 41 / 78      | 144 / 304     | 48 / 127     | 5 / 16       | 21 / 28     |             |              |               |              |          |
| KG_IS10_                | 81 / 89      | 255 / 385     | 91 / 159     | 10 / 20      | 40 / 30     | 45 / 25     |              |               |              |          |
| KG_IS11_                | 667 / 574    | 2447 / 2225   | 710 / 1115   | 82 / 137     | 312 / 199   | 358 / 153   | 457 / 273    |               |              |          |
| KG_IS12_                | 612 / 306    | 2296 / 1160   | 701 / 649    | 78 / 84      | 270 / 108   | 291 / 87    | 393 / 147    | 2523 / 1419   |              |          |
| KG_IS13_                | 106 / 98     | 369 / 399     | 112 / 188    | 13 / 23      | 48 / 36     | 56 / 28     | 69 / 51      | 388 / 488     | 200 / 448    |          |
| z                       | KG_IS1_      | KG_IS2_       | KG_IS3_      | KG_IS5_      | KG_IS6_     | KG_IS7_     | KG_IS10_     | KG_IS11_      | KG_IS12_     | KG_IS13_ |
| KG_IS1_                 |              |               |              |              |             |             |              |               |              |          |
| KG_IS2_                 | 0.36         |               |              |              |             |             |              |               |              |          |
| KG_IS3_                 | 1.22         | 1.88          |              |              |             |             |              |               |              |          |
| KG_IS5_                 | 1.22         | 0.79          | 0.26         |              |             |             |              |               |              |          |
| KG_IS6_                 | 0.73         | 0.75          | 1.39         | 1.25         |             |             |              |               |              |          |
| KG_IS7_                 | 1.17         | 1.54          | 1.80         | 1.25         | 0.45        |             |              |               |              |          |
| KG_IS10_                | 0.20         | 1.03          | 1.24         | 0.85         | 0.49        | 0.98        |              |               |              |          |
| KG_IS11_                | 0.48         | 0.48          | 1.65         | 0.73         | 0.96        | 1.75        | 1.29         |               |              |          |
| KG_IS12_                | <b>2.06</b>  | <b>3.07</b>   | 0.27         | 0.11         | 1.83        | <b>2.31</b> | <b>2.27</b>  | <b>2.69</b>   |              |          |
| KG_IS13_                | 0.18         | 0.21          | 1.23         | 0.72         | 0.51        | 1.18        | 0.59         | 0.63          | <b>2.06</b>  |          |
| ES                      | KG_IS1_      | KG_IS2_       | KG_IS3_      | KG_IS5_      | KG_IS6_     | KG_IS7_     | KG_IS10_     | KG_IS11_      | KG_IS12_     | KG_IS13_ |
| KG_IS1_                 |              |               |              |              |             |             |              |               |              |          |
| KG_IS2_                 | 0.00         |               |              |              |             |             |              |               |              |          |
| KG_IS3_                 | 0.03         | 0.02          |              |              |             |             |              |               |              |          |
| KG_IS5_                 | 0.06         | 0.01          | 0.01         |              |             |             |              |               |              |          |
| KG_IS6_                 | 0.03         | 0.01          | 0.04         | 0.13         |             |             |              |               |              |          |
| KG_IS7_                 | 0.05         | 0.02          | 0.06         | 0.13         | 0.03        |             |              |               |              |          |
| KG_IS10_                | 0.01         | 0.01          | 0.04         | 0.07         | 0.03        | 0.06        |              |               |              |          |
| KG_IS11_                | 0.01         | 0.00          | 0.02         | 0.01         | 0.01        | 0.02        | 0.02         |               |              |          |
| KG_IS12_                | 0.03         | 0.03          | 0.00         | 0.00         | 0.03        | 0.04        | 0.04         | 0.02          |              |          |
| KG_IS13_                | 0.01         | 0.00          | 0.03         | 0.05         | 0.03        | 0.06        | 0.03         | 0.01          | 0.03         |          |
| Degree of Association   | KG_IS1_      | KG_IS2_       | KG_IS3_      | KG_IS5_      | KG_IS6_     | KG_IS7_     | KG_IS10_     | KG_IS11_      | KG_IS12_     | KG_IS13_ |
| KG_IS1_                 |              |               |              |              |             |             |              |               |              |          |
| KG_IS2_                 | small        |               |              |              |             |             |              |               |              |          |
| KG_IS3_                 | small        | small         |              |              |             |             |              |               |              |          |
| KG_IS5_                 | small        | small         | small        |              |             |             |              |               |              |          |
| KG_IS6_                 | small        | small         | small        | small-medium |             |             |              |               |              |          |
| KG_IS7_                 | small        | small         | small        | small-medium | small       |             |              |               |              |          |
| KG_IS10_                | small        | small         | small        | small        | small       | small       |              |               |              |          |
| KG_IS11_                | small        | small         | small        | small        | small       | small       | small        |               |              |          |
| KG_IS12_                | small        | small         | small        | small        | small       | small       | small        | small         |              |          |
| KG_IS13_                | small        | small         | small        | small        | small       | small       | small        | small         | small        |          |
| Significantly Different | KG_IS1_      | KG_IS2_       | KG_IS3_      | KG_IS5_      | KG_IS6_     | KG_IS7_     | KG_IS10_     | KG_IS11_      | KG_IS12_     | KG_IS13_ |
| KG_IS1_                 |              |               |              |              |             |             |              |               |              |          |
| KG_IS2_                 | NO           |               |              |              |             |             |              |               |              |          |
| KG_IS3_                 | NO           | NO            |              |              |             |             |              |               |              |          |
| KG_IS5_                 | NO           | NO            | NO           |              |             |             |              |               |              |          |
| KG_IS6_                 | NO           | NO            | NO           | NO           |             |             |              |               |              |          |
| KG_IS7_                 | NO           | NO            | NO           | NO           | NO          |             |              |               |              |          |
| KG_IS10_                | NO           | NO            | NO           | NO           | NO          | NO          |              |               |              |          |
| KG_IS11_                | NO           | NO            | NO           | NO           | NO          | NO          | NO           |               |              |          |
| KG_IS12_                | <b>YES</b>   | <b>YES</b>    | NO           | NO           | NO          | <b>YES</b>  | <b>YES</b>   | <b>YES</b>    |              |          |
| KG_IS13_                | NO           | NO            | NO           | NO           | NO          | NO          | NO           | NO            | <b>YES</b>   |          |

# Kougarok Intensive Station Mann Whitney U-Test Results

## Boron

| n= (top / left / total) | KG_IS1_        | KG_IS2_         | KG_IS3_      | KG_IS5_       | KG_IS6_       | KG_IS7_       | KG_IS10_     | KG_IS11_        | KG_IS12_       | KG_IS13_ |
|-------------------------|----------------|-----------------|--------------|---------------|---------------|---------------|--------------|-----------------|----------------|----------|
| KG_IS1_                 |                |                 |              |               |               |               |              |                 |                |          |
| KG_IS2_                 | 17 / 64 / 81   |                 |              |               |               |               |              |                 |                |          |
| KG_IS3_                 | 17 / 25 / 42   | 64 / 25 / 89    |              |               |               |               |              |                 |                |          |
| KG_IS5_                 | 17 / 3 / 20    | 64 / 3 / 67     | 25 / 3 / 28  |               |               |               |              |                 |                |          |
| KG_IS6_                 | 17 / 7 / 24    | 64 / 7 / 71     | 25 / 7 / 32  |               |               |               |              |                 |                |          |
| KG_IS7_                 | 17 / 7 / 24    | 64 / 7 / 71     | 25 / 7 / 32  | 3 / 7 / 10    | 7 / 7 / 14    |               |              |                 |                |          |
| KG_IS10_                | 17 / 10 / 27   | 64 / 10 / 74    | 25 / 10 / 35 | 3 / 10 / 13   | 7 / 10 / 17   | 7 / 10 / 17   |              |                 |                |          |
| KG_IS11_                | 17 / 73 / 90   | 64 / 73 / 137   | 25 / 73 / 98 | 3 / 73 / 76   | 7 / 73 / 80   | 7 / 73 / 80   | 10 / 73 / 83 |                 |                |          |
| KG_IS12_                | 17 / 54 / 71   | 64 / 54 / 118   | 25 / 54 / 79 | 3 / 54 / 57   | 7 / 54 / 61   | 7 / 54 / 61   | 10 / 54 / 64 | 73 / 54 / 127   |                |          |
| KG_IS13_                | 17 / 12 / 29   | 64 / 12 / 76    | 25 / 12 / 37 | 3 / 12 / 15   | 7 / 12 / 19   | 7 / 12 / 19   | 10 / 12 / 22 | 73 / 12 / 85    | 54 / 12 / 66   |          |
| Σ[Rank] (top / left)    | KG_IS1_        | KG_IS2_         | KG_IS3_      | KG_IS5_       | KG_IS6_       | KG_IS7_       | KG_IS10_     | KG_IS11_        | KG_IS12_       | KG_IS13_ |
| KG_IS1_                 |                |                 |              |               |               |               |              |                 |                |          |
| KG_IS2_                 | 491.5 / 2829.5 |                 |              |               |               |               |              |                 |                |          |
| KG_IS3_                 | 281 / 622      | 2736 / 1269     |              |               |               |               |              |                 |                |          |
| KG_IS5_                 | 187.5 / 22.5   | 2243.5 / 34.5   | 385 / 21     |               |               |               |              |                 |                |          |
| KG_IS6_                 | 233.5 / 66.5   | 2461.5 / 94.5   | 465 / 63     | 16.5 / 38.5   |               |               |              |                 |                |          |
| KG_IS7_                 | 233.5 / 66.5   | 2461.5 / 94.5   | 465 / 63     | 16.5 / 38.5   | 52.5 / 52.5   |               |              |                 |                |          |
| KG_IS10_                | 205 / 173      | 2406 / 369      | 471 / 159    | 9 / 82        | 35 / 118      | 35 / 118      |              |                 |                |          |
| KG_IS11_                | 450.5 / 3644.5 | 3855.5 / 5597.5 | 1300 / 3551  | 28.5 / 2897.5 | 80.5 / 3159.5 | 80.5 / 3159.5 | 318 / 3168   |                 |                |          |
| KG_IS12_                | 404.5 / 2151.5 | 3399.5 / 3621.5 | 1043 / 2117  | 31.5 / 1621.5 | 87.5 / 1803.5 | 87.5 / 1803.5 | 264 / 1816   | 4571.5 / 3556.5 |                |          |
| KG_IS13_                | 233.5 / 201.5  | 2513.5 / 412.5  | 513 / 190    | 13.5 / 106.5  | 45.5 / 144.5  | 45.5 / 144.5  | 124 / 129    | 3270.5 / 384.5  | 1889.5 / 321.5 |          |
| U (top / left)          | KG_IS1_        | KG_IS2_         | KG_IS3_      | KG_IS5_       | KG_IS6_       | KG_IS7_       | KG_IS10_     | KG_IS11_        | KG_IS12_       | KG_IS13_ |
| KG_IS1_                 |                |                 |              |               |               |               |              |                 |                |          |
| KG_IS2_                 | 749.5 / 338.5  |                 |              |               |               |               |              |                 |                |          |
| KG_IS3_                 | 297 / 128      | 944 / 656       |              |               |               |               |              |                 |                |          |
| KG_IS5_                 | 16.5 / 34.5    | 28.5 / 163.5    | 15 / 60      |               |               |               |              |                 |                |          |
| KG_IS6_                 | 38.5 / 80.5    | 66.5 / 381.5    | 35 / 140     | 10.5 / 10.5   |               |               |              |                 |                |          |
| KG_IS7_                 | 38.5 / 80.5    | 66.5 / 381.5    | 35 / 140     | 10.5 / 10.5   | 24.5 / 24.5   |               |              |                 |                |          |
| KG_IS10_                | 118 / 52       | 314 / 326       | 104 / 146    | 27 / 3        | 63 / 7        | 63 / 7        |              |                 |                |          |
| KG_IS11_                | 943.5 / 297.5  | 2896.5 / 1775.5 | 850 / 975    | 196.5 / 22.5  | 458.5 / 52.5  | 458.5 / 52.5  | 467 / 263    |                 |                |          |
| KG_IS12_                | 666.5 / 251.5  | 2136.5 / 1319.5 | 632 / 718    | 136.5 / 25.5  | 318.5 / 59.5  | 318.5 / 59.5  | 331 / 209    | 2071.5 / 1870.5 |                |          |
| KG_IS13_                | 123.5 / 80.5   | 334.5 / 433.5   | 112 / 188    | 28.5 / 7.5    | 66.5 / 17.5   | 66.5 / 17.5   | 51 / 69      | 306.5 / 569.5   | 243.5 / 404.5  |          |
| z                       | KG_IS1_        | KG_IS2_         | KG_IS3_      | KG_IS5_       | KG_IS6_       | KG_IS7_       | KG_IS10_     | KG_IS11_        | KG_IS12_       | KG_IS13_ |
| KG_IS1_                 |                |                 |              |               |               |               |              |                 |                |          |
| KG_IS2_                 | 2.38           |                 |              |               |               |               |              |                 |                |          |
| KG_IS3_                 | 2.17           | 1.31            |              |               |               |               |              |                 |                |          |
| KG_IS5_                 | 0.95           | 2.05            | 1.67         |               |               |               |              |                 |                |          |
| KG_IS6_                 | 1.33           | 3.04            | 2.39         | 0.00          |               |               |              |                 |                |          |
| KG_IS7_                 | 1.33           | 3.04            | 2.39         | 0.00          | 0.00          |               |              |                 |                |          |
| KG_IS10_                | 1.66           | 0.09            | 0.77         | 2.03          | 2.73          | 2.73          |              |                 |                |          |
| KG_IS11_                | 3.33           | 2.42            | 0.51         | 2.32          | 3.46          | 3.46          | 1.43         |                 |                |          |
| KG_IS12_                | 2.80           | 2.21            | 0.45         | 1.98          | 2.93          | 2.93          | 1.13         | 0.49            |                |          |
| KG_IS13_                | 0.95           | 0.71            | 1.23         | 1.52          | 2.07          | 2.07          | 0.59         | 1.66            | 1.34           |          |
| ES                      | KG_IS1_        | KG_IS2_         | KG_IS3_      | KG_IS5_       | KG_IS6_       | KG_IS7_       | KG_IS10_     | KG_IS11_        | KG_IS12_       | KG_IS13_ |
| KG_IS1_                 |                |                 |              |               |               |               |              |                 |                |          |
| KG_IS2_                 | 0.03           |                 |              |               |               |               |              |                 |                |          |
| KG_IS3_                 | 0.05           | 0.01            |              |               |               |               |              |                 |                |          |
| KG_IS5_                 | 0.05           | 0.03            | 0.06         |               |               |               |              |                 |                |          |
| KG_IS6_                 | 0.06           | 0.04            | 0.07         | 0.00          |               |               |              |                 |                |          |
| KG_IS7_                 | 0.06           | 0.04            | 0.07         | 0.00          | 0.00          |               |              |                 |                |          |
| KG_IS10_                | 0.06           | 0.00            | 0.02         | 0.16          | 0.16          | 0.16          |              |                 |                |          |
| KG_IS11_                | 0.04           | 0.02            | 0.01         | 0.03          | 0.04          | 0.04          | 0.02         |                 |                |          |
| KG_IS12_                | 0.04           | 0.02            | 0.01         | 0.03          | 0.05          | 0.05          | 0.02         | 0.00            |                |          |
| KG_IS13_                | 0.03           | 0.01            | 0.03         | 0.10          | 0.11          | 0.11          | 0.03         | 0.02            | 0.02           |          |
| Degree of Association   | KG_IS1_        | KG_IS2_         | KG_IS3_      | KG_IS5_       | KG_IS6_       | KG_IS7_       | KG_IS10_     | KG_IS11_        | KG_IS12_       | KG_IS13_ |
| KG_IS1_                 |                |                 |              |               |               |               |              |                 |                |          |
| KG_IS2_                 | small          |                 |              |               |               |               |              |                 |                |          |
| KG_IS3_                 | small          | small           |              |               |               |               |              |                 |                |          |
| KG_IS5_                 | small          | small           | small        |               |               |               |              |                 |                |          |
| KG_IS6_                 | small          | small           | small        | small         |               |               |              |                 |                |          |
| KG_IS7_                 | small          | small           | small        | small         | small         |               |              |                 |                |          |
| KG_IS10_                | small          | small           | small        | small-medium  | small-medium  | small-medium  |              |                 |                |          |
| KG_IS11_                | small          | small           | small        | small         | small         | small         | small        |                 |                |          |
| KG_IS12_                | small          | small           | small        | small         | small         | small         | small        | small           |                |          |
| KG_IS13_                | small          | small           | small        | small-medium  | small-medium  | small-medium  | small        | small           | small          |          |
| Significantly Different | KG_IS1_        | KG_IS2_         | KG_IS3_      | KG_IS5_       | KG_IS6_       | KG_IS7_       | KG_IS10_     | KG_IS11_        | KG_IS12_       | KG_IS13_ |
| KG_IS1_                 |                |                 |              |               |               |               |              |                 |                |          |
| KG_IS2_                 | YES            |                 |              |               |               |               |              |                 |                |          |
| KG_IS3_                 | YES            | NO              |              |               |               |               |              |                 |                |          |
| KG_IS5_                 | NO             | YES             | NO           |               |               |               |              |                 |                |          |
| KG_IS6_                 | NO             | YES             | YES          | NO            |               |               |              |                 |                |          |
| KG_IS7_                 | NO             | YES             | YES          | NO            | NO            |               |              |                 |                |          |
| KG_IS10_                | NO             | NO              | NO           | YES           | YES           | YES           |              |                 |                |          |
| KG_IS11_                | YES            | YES             | NO           | YES           | YES           | YES           | NO           |                 |                |          |
| KG_IS12_                | YES            | YES             | NO           | YES           | YES           | YES           | NO           | NO              |                |          |
| KG_IS13_                | NO             | NO              | NO           | NO            | YES           | YES           | NO           | NO              | NO             |          |







# Kougarok Intensive Station Mann Whitney U-Test Results

## Chloride

| n= (top / left / total) | KG_IS1_      | KG_IS2_         | KG_IS3_         | KG_IS5_      | KG_IS6_        | KG_IS7_     | KG_IS10_     | KG_IS11_        | KG_IS12_     | KG_IS13_ |
|-------------------------|--------------|-----------------|-----------------|--------------|----------------|-------------|--------------|-----------------|--------------|----------|
| KG_IS1_                 |              |                 |                 |              |                |             |              |                 |              |          |
| KG_IS2_                 | 14 / 64 / 78 |                 |                 |              |                |             |              |                 |              |          |
| KG_IS3_                 | 14 / 25 / 39 | 64 / 25 / 89    |                 |              |                |             |              |                 |              |          |
| KG_IS5_                 | 14 / 3 / 17  | 64 / 3 / 67     | 25 / 3 / 28     |              |                |             |              |                 |              |          |
| KG_IS6_                 | 14 / 7 / 21  | 64 / 7 / 71     | 25 / 7 / 32     |              |                |             |              |                 |              |          |
| KG_IS7_                 | 14 / 7 / 21  | 64 / 7 / 71     | 25 / 7 / 32     | 3 / 7 / 10   | 7 / 7 / 14     |             |              |                 |              |          |
| KG_IS10_                | 14 / 10 / 24 | 64 / 10 / 74    | 25 / 10 / 35    | 3 / 10 / 13  | 7 / 10 / 17    | 7 / 10 / 17 |              |                 |              |          |
| KG_IS11_                | 14 / 72 / 86 | 64 / 72 / 136   | 25 / 72 / 97    | 3 / 72 / 75  | 7 / 72 / 79    | 7 / 72 / 79 | 10 / 72 / 82 |                 |              |          |
| KG_IS12_                | 14 / 55 / 69 | 64 / 55 / 119   | 25 / 55 / 80    | 3 / 55 / 58  | 7 / 55 / 62    | 7 / 55 / 62 | 10 / 55 / 65 | 72 / 55 / 127   |              |          |
| KG_IS13_                | 14 / 12 / 26 | 64 / 12 / 76    | 25 / 12 / 37    | 3 / 12 / 15  | 7 / 12 / 19    | 7 / 12 / 19 | 10 / 12 / 22 | 72 / 12 / 84    | 55 / 12 / 67 |          |
| Σ[Rank] (top / left)    | KG_IS1_      | KG_IS2_         | KG_IS3_         | KG_IS5_      | KG_IS6_        | KG_IS7_     | KG_IS10_     | KG_IS11_        | KG_IS12_     | KG_IS13_ |
| KG_IS1_                 |              |                 |                 |              |                |             |              |                 |              |          |
| KG_IS2_                 | 429 / 2652   |                 |                 |              |                |             |              |                 |              |          |
| KG_IS3_                 | 193 / 587    | 2581.5 / 1423.5 |                 |              |                |             |              |                 |              |          |
| KG_IS5_                 | 116 / 37     | 2141 / 137      | 349 / 57        |              |                |             |              |                 |              |          |
| KG_IS6_                 | 150.5 / 80.5 | 2351.5 / 204.5  | 447 / 81        | 22 / 33      |                |             |              |                 |              |          |
| KG_IS7_                 | 145 / 86     | 2367 / 189      | 434 / 94        | 18 / 37      | 49 / 56        |             |              |                 |              |          |
| KG_IS10_                | 175 / 125    | 2554 / 221      | 520 / 110       | 29 / 62      | 65 / 88        | 72 / 81     |              |                 |              |          |
| KG_IS11_                | 431 / 3310   | 4219 / 5097     | 1430.5 / 3322.5 | 143 / 2707   | 209 / 2951     | 187 / 2973  | 218 / 3185   |                 |              |          |
| KG_IS12_                | 267 / 2148   | 2995.5 / 4144.5 | 982.5 / 2257.5  | 100 / 1611   | 121.5 / 1831.5 | 118 / 1835  | 142 / 2003   | 3955.5 / 4172.5 |              |          |
| KG_IS13_                | 175 / 176    | 2497 / 429      | 554 / 149       | 34 / 86      | 70 / 120       | 70 / 120    | 102 / 151    | 3151 / 419      | 2067 / 211   |          |
| U (top / left)          | KG_IS1_      | KG_IS2_         | KG_IS3_         | KG_IS5_      | KG_IS6_        | KG_IS7_     | KG_IS10_     | KG_IS11_        | KG_IS12_     | KG_IS13_ |
| KG_IS1_                 |              |                 |                 |              |                |             |              |                 |              |          |
| KG_IS2_                 | 572 / 324    |                 |                 |              |                |             |              |                 |              |          |
| KG_IS3_                 | 262 / 88     | 1098.5 / 501.5  |                 |              |                |             |              |                 |              |          |
| KG_IS5_                 | 31 / 11      | 131 / 61        | 51 / 24         |              |                |             |              |                 |              |          |
| KG_IS6_                 | 52.5 / 45.5  | 176.5 / 271.5   | 53 / 122        | 5 / 16       |                |             |              |                 |              |          |
| KG_IS7_                 | 58 / 40      | 161 / 287       | 66 / 109        | 9 / 12       | 28 / 21        |             |              |                 |              |          |
| KG_IS10_                | 70 / 70      | 166 / 474       | 55 / 195        | 7 / 23       | 33 / 37        | 26 / 44     |              |                 |              |          |
| KG_IS11_                | 682 / 326    | 2469 / 2139     | 694.5 / 1105.5  | 79 / 137     | 323 / 181      | 345 / 159   | 557 / 163    |                 |              |          |
| KG_IS12_                | 608 / 162    | 2604.5 / 915.5  | 717.5 / 657.5   | 71 / 94      | 291.5 / 93.5   | 295 / 90    | 463 / 87     | 2632.5 / 1327.5 |              |          |
| KG_IS13_                | 98 / 70      | 351 / 417       | 71 / 229        | 8 / 28       | 42 / 42        | 42 / 42     | 73 / 47      | 341 / 523       | 133 / 527    |          |
| z                       | KG_IS1_      | KG_IS2_         | KG_IS3_         | KG_IS5_      | KG_IS6_        | KG_IS7_     | KG_IS10_     | KG_IS11_        | KG_IS12_     | KG_IS13_ |
| KG_IS1_                 |              |                 |                 |              |                |             |              |                 |              |          |
| KG_IS2_                 | 1.61         |                 |                 |              |                |             |              |                 |              |          |
| KG_IS3_                 | <b>2.55</b>  | <b>2.72</b>     |                 |              |                |             |              |                 |              |          |
| KG_IS5_                 | 1.26         | 1.06            | 1.00            |              |                |             |              |                 |              |          |
| KG_IS6_                 | 0.26         | 0.92            | 1.57            | 1.25         |                |             |              |                 |              |          |
| KG_IS7_                 | 0.67         | 1.22            | 0.98            | 0.34         | 0.45           |             |              |                 |              |          |
| KG_IS10_                | 0.00         | <b>2.43</b>     | <b>2.56</b>     | 1.35         | 0.20           | 0.88        |              |                 |              |          |
| KG_IS11_                | <b>2.08</b>  | 0.72            | 1.69            | 0.78         | 1.22           | 1.60        | <b>2.79</b>  |                 |              |          |
| KG_IS12_                | <b>3.33</b>  | <b>4.50</b>     | 0.31            | 0.40         | <b>2.20</b>    | <b>2.28</b> | <b>3.42</b>  | <b>3.17</b>     |              |          |
| KG_IS13_                | 0.72         | 0.47            | <b>2.56</b>     | 1.44         | 0.00           | 0.00        | 0.86         | 1.16            | <b>3.22</b>  |          |
| ES                      | KG_IS1_      | KG_IS2_         | KG_IS3_         | KG_IS5_      | KG_IS6_        | KG_IS7_     | KG_IS10_     | KG_IS11_        | KG_IS12_     | KG_IS13_ |
| KG_IS1_                 |              |                 |                 |              |                |             |              |                 |              |          |
| KG_IS2_                 | 0.02         |                 |                 |              |                |             |              |                 |              |          |
| KG_IS3_                 | 0.07         | 0.03            |                 |              |                |             |              |                 |              |          |
| KG_IS5_                 | 0.07         | 0.02            | 0.04            |              |                |             |              |                 |              |          |
| KG_IS6_                 | 0.01         | 0.01            | 0.05            | 0.13         |                |             |              |                 |              |          |
| KG_IS7_                 | 0.03         | 0.02            | 0.03            | 0.03         | 0.03           |             |              |                 |              |          |
| KG_IS10_                | 0.00         | 0.03            | 0.07            | 0.10         | 0.01           | 0.05        |              |                 |              |          |
| KG_IS11_                | 0.02         | 0.01            | 0.02            | 0.01         | 0.02           | 0.02        | 0.03         |                 |              |          |
| KG_IS12_                | 0.05         | 0.04            | 0.00            | 0.01         | 0.04           | 0.04        | 0.05         | 0.02            |              |          |
| KG_IS13_                | 0.03         | 0.01            | 0.07            | 0.10         | 0.00           | 0.00        | 0.04         | 0.01            | 0.05         |          |
| Degree of Association   | KG_IS1_      | KG_IS2_         | KG_IS3_         | KG_IS5_      | KG_IS6_        | KG_IS7_     | KG_IS10_     | KG_IS11_        | KG_IS12_     | KG_IS13_ |
| KG_IS1_                 |              |                 |                 |              |                |             |              |                 |              |          |
| KG_IS2_                 | small        |                 |                 |              |                |             |              |                 |              |          |
| KG_IS3_                 | small        | small           |                 |              |                |             |              |                 |              |          |
| KG_IS5_                 | small        | small           | small           |              |                |             |              |                 |              |          |
| KG_IS6_                 | small        | small           | small           | small-medium |                |             |              |                 |              |          |
| KG_IS7_                 | small        | small           | small           | small        | small          |             |              |                 |              |          |
| KG_IS10_                | small        | small           | small           | small-medium | small          | small       |              |                 |              |          |
| KG_IS11_                | small        | small           | small           | small        | small          | small       | small        |                 |              |          |
| KG_IS12_                | small        | small           | small           | small        | small          | small       | small        | small           |              |          |
| KG_IS13_                | small        | small           | small           | small        | small          | small       | small        | small           | small        |          |
| Significantly Different | KG_IS1_      | KG_IS2_         | KG_IS3_         | KG_IS5_      | KG_IS6_        | KG_IS7_     | KG_IS10_     | KG_IS11_        | KG_IS12_     | KG_IS13_ |
| KG_IS1_                 |              |                 |                 |              |                |             |              |                 |              |          |
| KG_IS2_                 | NO           |                 |                 |              |                |             |              |                 |              |          |
| KG_IS3_                 | <b>YES</b>   | <b>YES</b>      |                 |              |                |             |              |                 |              |          |
| KG_IS5_                 | NO           | NO              | NO              |              |                |             |              |                 |              |          |
| KG_IS6_                 | NO           | NO              | NO              | NO           |                |             |              |                 |              |          |
| KG_IS7_                 | NO           | NO              | NO              | NO           | NO             |             |              |                 |              |          |
| KG_IS10_                | NO           | <b>YES</b>      | <b>YES</b>      | NO           | NO             | NO          |              |                 |              |          |
| KG_IS11_                | <b>YES</b>   | NO              | NO              | NO           | NO             | NO          | <b>YES</b>   |                 |              |          |
| KG_IS12_                | <b>YES</b>   | <b>YES</b>      | NO              | NO           | <b>YES</b>     | <b>YES</b>  | <b>YES</b>   | <b>YES</b>      |              |          |
| KG_IS13_                | NO           | NO              | <b>YES</b>      | NO           | NO             | NO          | NO           | NO              | <b>YES</b>   |          |

# Kougarok Intensive Station Mann Whitney U-Test Results

## Chromium

| n= (top / left / total) | KG_IS1_         | KG_IS2_         | KG_IS3_         | KG_IS5_      | KG_IS6_        | KG_IS7_        | KG_IS10_     | KG_IS11_      | KG_IS12_       | KG_IS13_ |
|-------------------------|-----------------|-----------------|-----------------|--------------|----------------|----------------|--------------|---------------|----------------|----------|
| KG_IS1_                 |                 |                 |                 |              |                |                |              |               |                |          |
| KG_IS2_                 | 17 / 64 / 81    |                 |                 |              |                |                |              |               |                |          |
| KG_IS3_                 | 17 / 25 / 42    | 64 / 25 / 89    |                 |              |                |                |              |               |                |          |
| KG_IS5_                 | 17 / 3 / 20     | 64 / 3 / 67     | 25 / 3 / 28     |              |                |                |              |               |                |          |
| KG_IS6_                 | 17 / 7 / 24     | 64 / 7 / 71     | 25 / 7 / 32     |              |                |                |              |               |                |          |
| KG_IS7_                 | 17 / 7 / 24     | 64 / 7 / 71     | 25 / 7 / 32     | 3 / 7 / 10   | 7 / 7 / 14     |                |              |               |                |          |
| KG_IS10_                | 17 / 10 / 27    | 64 / 10 / 74    | 25 / 10 / 35    | 3 / 10 / 13  | 7 / 10 / 17    | 7 / 10 / 17    |              |               |                |          |
| KG_IS11_                | 17 / 73 / 90    | 64 / 73 / 137   | 25 / 73 / 98    | 3 / 73 / 76  | 7 / 73 / 80    | 7 / 73 / 80    | 10 / 73 / 83 |               |                |          |
| KG_IS12_                | 17 / 54 / 71    | 64 / 54 / 118   | 25 / 54 / 79    | 3 / 54 / 57  | 7 / 54 / 61    | 7 / 54 / 61    | 10 / 54 / 64 | 73 / 54 / 127 |                |          |
| KG_IS13_                | 17 / 12 / 29    | 64 / 12 / 76    | 25 / 12 / 37    | 3 / 12 / 15  | 7 / 12 / 19    | 7 / 12 / 19    | 10 / 12 / 22 | 73 / 12 / 85  | 54 / 12 / 66   |          |
| Σ[Rank] (top / left)    | KG_IS1_         | KG_IS2_         | KG_IS3_         | KG_IS5_      | KG_IS6_        | KG_IS7_        | KG_IS10_     | KG_IS11_      | KG_IS12_       | KG_IS13_ |
| KG_IS1_                 |                 |                 |                 |              |                |                |              |               |                |          |
| KG_IS2_                 | 1070.5 / 2250.5 |                 |                 |              |                |                |              |               |                |          |
| KG_IS3_                 | 439.5 / 463.5   | 2645.5 / 1359.5 |                 |              |                |                |              |               |                |          |
| KG_IS5_                 | 201 / 9         | 2221 / 57       | 381 / 25        |              |                |                |              |               |                |          |
| KG_IS6_                 | 218.5 / 81.5    | 2230.5 / 325.5  | 398.5 / 129.5   | 10 / 45      |                |                |              |               |                |          |
| KG_IS7_                 | 239.5 / 60.5    | 2235.5 / 320.5  | 420.5 / 107.5   | 10 / 45      | 56.5 / 48.5    |                |              |               |                |          |
| KG_IS10_                | 268 / 110       | 2214 / 561      | 436 / 194       | 7 / 84       | 64 / 89        | 59 / 94        |              |               |                |          |
| KG_IS11_                | 1171 / 2924     | 3757 / 5696     | 1394 / 3457     | 32 / 2894    | 333 / 2907     | 338 / 2902     | 576 / 2910   |               |                |          |
| KG_IS12_                | 813.5 / 1742.5  | 3134.5 / 3886.5 | 1009.5 / 2150.5 | 26 / 1627    | 235.5 / 1655.5 | 217.5 / 1673.5 | 371 / 1709   | 4259 / 3869   |                |          |
| KG_IS13_                | 322.5 / 112.5   | 2387.5 / 538.5  | 508.5 / 194.5   | 13 / 107     | 79.5 / 110.5   | 81.5 / 108.5   | 145 / 108    | 3160 / 495    | 1892.5 / 318.5 |          |
| U (top / left)          | KG_IS1_         | KG_IS2_         | KG_IS3_         | KG_IS5_      | KG_IS6_        | KG_IS7_        | KG_IS10_     | KG_IS11_      | KG_IS12_       | KG_IS13_ |
| KG_IS1_                 |                 |                 |                 |              |                |                |              |               |                |          |
| KG_IS2_                 | 170.5 / 917.5   |                 |                 |              |                |                |              |               |                |          |
| KG_IS3_                 | 138.5 / 286.5   | 1034.5 / 565.5  |                 |              |                |                |              |               |                |          |
| KG_IS5_                 | 3 / 48          | 51 / 141        | 19 / 56         |              |                |                |              |               |                |          |
| KG_IS6_                 | 53.5 / 65.5     | 297.5 / 150.5   | 101.5 / 73.5    | 17 / 4       |                |                |              |               |                |          |
| KG_IS7_                 | 32.5 / 86.5     | 292.5 / 155.5   | 79.5 / 95.5     | 17 / 4       | 20.5 / 28.5    |                |              |               |                |          |
| KG_IS10_                | 55 / 115        | 506 / 134       | 139 / 111       | 29 / 1       | 34 / 36        | 39 / 31        |              |               |                |          |
| KG_IS11_                | 223 / 1018      | 2995 / 1677     | 756 / 1069      | 193 / 26     | 206 / 305      | 201 / 310      | 209 / 521    |               |                |          |
| KG_IS12_                | 257.5 / 660.5   | 2401.5 / 1054.5 | 665.5 / 684.5   | 142 / 20     | 170.5 / 207.5  | 188.5 / 189.5  | 224 / 316    | 2384 / 1558   |                |          |
| KG_IS13_                | 34.5 / 169.5    | 460.5 / 307.5   | 116.5 / 183.5   | 29 / 7       | 32.5 / 51.5    | 30.5 / 53.5    | 30 / 90      | 417 / 459     | 240.5 / 407.5  |          |
| z                       | KG_IS1_         | KG_IS2_         | KG_IS3_         | KG_IS5_      | KG_IS6_        | KG_IS7_        | KG_IS10_     | KG_IS11_      | KG_IS12_       | KG_IS13_ |
| KG_IS1_                 |                 |                 |                 |              |                |                |              |               |                |          |
| KG_IS2_                 | 4.33            |                 |                 |              |                |                |              |               |                |          |
| KG_IS3_                 | 1.90            | 2.14            |                 |              |                |                |              |               |                |          |
| KG_IS5_                 | 2.38            | 1.36            | 1.37            |              |                |                |              |               |                |          |
| KG_IS6_                 | 0.38            | 1.42            | 0.64            | 1.48         |                |                |              |               |                |          |
| KG_IS7_                 | 1.71            | 1.32            | 0.36            | 1.48         | 0.51           |                |              |               |                |          |
| KG_IS10_                | 1.51            | 2.94            | 0.51            | 2.37         | 0.10           | 0.39           |              |               |                |          |
| KG_IS11_                | 4.10            | 2.84            | 1.28            | 2.23         | 0.84           | 0.93           | 2.18         |               |                |          |
| KG_IS12_                | 2.72            | 3.64            | 0.10            | 2.18         | 0.42           | 0.01           | 0.85         | 2.01          |                |          |
| KG_IS13_                | 2.99            | 1.09            | 1.09            | 1.59         | 0.80           | 0.97           | 1.98         | 0.27          | 1.39           |          |
| ES                      | KG_IS1_         | KG_IS2_         | KG_IS3_         | KG_IS5_      | KG_IS6_        | KG_IS7_        | KG_IS10_     | KG_IS11_      | KG_IS12_       | KG_IS13_ |
| KG_IS1_                 |                 |                 |                 |              |                |                |              |               |                |          |
| KG_IS2_                 | 0.05            |                 |                 |              |                |                |              |               |                |          |
| KG_IS3_                 | 0.05            | 0.02            |                 |              |                |                |              |               |                |          |
| KG_IS5_                 | 0.12            | 0.02            | 0.05            |              |                |                |              |               |                |          |
| KG_IS6_                 | 0.02            | 0.02            | 0.02            | 0.15         |                |                |              |               |                |          |
| KG_IS7_                 | 0.07            | 0.02            | 0.01            | 0.15         | 0.04           |                |              |               |                |          |
| KG_IS10_                | 0.06            | 0.04            | 0.01            | 0.18         | 0.01           | 0.02           |              |               |                |          |
| KG_IS11_                | 0.05            | 0.02            | 0.01            | 0.03         | 0.01           | 0.01           | 0.03         |               |                |          |
| KG_IS12_                | 0.04            | 0.03            | 0.00            | 0.04         | 0.01           | 0.00           | 0.01         | 0.02          |                |          |
| KG_IS13_                | 0.10            | 0.01            | 0.03            | 0.11         | 0.04           | 0.05           | 0.09         | 0.00          | 0.02           |          |
| Degree of Association   | KG_IS1_         | KG_IS2_         | KG_IS3_         | KG_IS5_      | KG_IS6_        | KG_IS7_        | KG_IS10_     | KG_IS11_      | KG_IS12_       | KG_IS13_ |
| KG_IS1_                 |                 |                 |                 |              |                |                |              |               |                |          |
| KG_IS2_                 | small           |                 |                 |              |                |                |              |               |                |          |
| KG_IS3_                 | small           | small           |                 |              |                |                |              |               |                |          |
| KG_IS5_                 | small-medium    | small           | small           |              |                |                |              |               |                |          |
| KG_IS6_                 | small           | small           | small           | small-medium |                |                |              |               |                |          |
| KG_IS7_                 | small           | small           | small           | small-medium | small          |                |              |               |                |          |
| KG_IS10_                | small           | small           | small           | small-medium | small          | small          |              |               |                |          |
| KG_IS11_                | small           | small           | small           | small        | small          | small          | small        |               |                |          |
| KG_IS12_                | small           | small           | small           | small        | small          | small          | small        | small         |                |          |
| KG_IS13_                | small-medium    | small           | small           | small-medium | small          | small          | small        | small         | small          |          |
| Significantly Different | KG_IS1_         | KG_IS2_         | KG_IS3_         | KG_IS5_      | KG_IS6_        | KG_IS7_        | KG_IS10_     | KG_IS11_      | KG_IS12_       | KG_IS13_ |
| KG_IS1_                 |                 |                 |                 |              |                |                |              |               |                |          |
| KG_IS2_                 | YES             |                 |                 |              |                |                |              |               |                |          |
| KG_IS3_                 | NO              | YES             |                 |              |                |                |              |               |                |          |
| KG_IS5_                 | YES             | NO              | NO              |              |                |                |              |               |                |          |
| KG_IS6_                 | NO              | NO              | NO              | NO           |                |                |              |               |                |          |
| KG_IS7_                 | NO              | NO              | NO              | NO           | NO             |                |              |               |                |          |
| KG_IS10_                | NO              | YES             | NO              | YES          | NO             | NO             |              |               |                |          |
| KG_IS11_                | YES             | YES             | NO              | YES          | NO             | NO             | YES          |               |                |          |
| KG_IS12_                | YES             | YES             | NO              | YES          | NO             | NO             | NO           | YES           |                |          |
| KG_IS13_                | YES             | NO              | NO              | NO           | NO             | NO             | YES          | NO            | NO             |          |

# Kougarok Intensive Station Mann Whitney U-Test Results

## Fluoride

| n= (top / left / total) | KG_IS1_      | KG_IS2_       | KG_IS3_         | KG_IS5_      | KG_IS6_      | KG_IS7_      | KG_IS10_     | KG_IS11_        | KG_IS12_       | KG_IS13_ |
|-------------------------|--------------|---------------|-----------------|--------------|--------------|--------------|--------------|-----------------|----------------|----------|
| KG_IS1_                 |              |               |                 |              |              |              |              |                 |                |          |
| KG_IS2_                 | 14 / 64 / 78 |               |                 |              |              |              |              |                 |                |          |
| KG_IS3_                 | 14 / 25 / 39 | 64 / 25 / 89  |                 |              |              |              |              |                 |                |          |
| KG_IS5_                 | 14 / 3 / 17  | 64 / 3 / 67   | 25 / 3 / 28     |              |              |              |              |                 |                |          |
| KG_IS6_                 | 14 / 7 / 21  | 64 / 7 / 71   | 25 / 7 / 32     |              |              |              |              |                 |                |          |
| KG_IS7_                 | 14 / 7 / 21  | 64 / 7 / 71   | 25 / 7 / 32     | 3 / 7 / 10   | 7 / 7 / 14   |              |              |                 |                |          |
| KG_IS10_                | 14 / 10 / 24 | 64 / 10 / 74  | 25 / 10 / 35    | 3 / 10 / 13  | 7 / 10 / 17  | 7 / 10 / 17  |              |                 |                |          |
| KG_IS11_                | 14 / 73 / 87 | 64 / 73 / 137 | 25 / 73 / 98    | 3 / 73 / 76  | 7 / 73 / 80  | 7 / 73 / 80  | 10 / 73 / 83 |                 |                |          |
| KG_IS12_                | 14 / 55 / 69 | 64 / 55 / 119 | 25 / 55 / 80    | 3 / 55 / 58  | 7 / 55 / 62  | 7 / 55 / 62  | 10 / 55 / 65 | 73 / 55 / 128   |                |          |
| KG_IS13_                | 14 / 12 / 26 | 64 / 12 / 76  | 25 / 12 / 37    | 3 / 12 / 15  | 7 / 12 / 19  | 7 / 12 / 19  | 10 / 12 / 22 | 73 / 12 / 85    | 55 / 12 / 67   |          |
| Σ[Rank] (top / left)    | KG_IS1_      | KG_IS2_       | KG_IS3_         | KG_IS5_      | KG_IS6_      | KG_IS7_      | KG_IS10_     | KG_IS11_        | KG_IS12_       | KG_IS13_ |
| KG_IS1_                 |              |               |                 |              |              |              |              |                 |                |          |
| KG_IS2_                 | 325 / 2756   |               |                 |              |              |              |              |                 |                |          |
| KG_IS3_                 | 233 / 547    | 3010 / 995    |                 |              |              |              |              |                 |                |          |
| KG_IS5_                 | 138 / 15     | 2264.5 / 13.5 | 388 / 18        |              |              |              |              |                 |                |          |
| KG_IS6_                 | 182 / 49     | 2510.5 / 45.5 | 472 / 56        | 16.5 / 38.5  |              |              |              |                 |                |          |
| KG_IS7_                 | 182 / 49     | 2510.5 / 45.5 | 472 / 56        | 16.5 / 38.5  | 52.5 / 52.5  |              |              |                 |                |          |
| KG_IS10_                | 140 / 160    | 2420 / 355    | 430 / 200       | 6 / 85       | 28 / 125     | 28 / 125     |              |                 |                |          |
| KG_IS11_                | 476 / 3352   | 5123 / 4330   | 1264.5 / 3586.5 | 18 / 2908    | 56 / 3184    | 56 / 3184    | 525 / 2961   |                 |                |          |
| KG_IS12_                | 361 / 2054   | 4147 / 2993   | 985.5 / 2254.5  | 12 / 1699    | 42 / 1911    | 42 / 1911    | 371 / 1774   | 4550.5 / 3705.5 |                |          |
| KG_IS13_                | 178 / 173    | 2632 / 294    | 493.5 / 209.5   | 6 / 114      | 28 / 162     | 28 / 162     | 139 / 114    | 3207.5 / 447.5  | 1938.5 / 339.5 |          |
| U (top / left)          | KG_IS1_      | KG_IS2_       | KG_IS3_         | KG_IS5_      | KG_IS6_      | KG_IS7_      | KG_IS10_     | KG_IS11_        | KG_IS12_       | KG_IS13_ |
| KG_IS1_                 |              |               |                 |              |              |              |              |                 |                |          |
| KG_IS2_                 | 676 / 220    |               |                 |              |              |              |              |                 |                |          |
| KG_IS3_                 | 222 / 128    | 670 / 930     |                 |              |              |              |              |                 |                |          |
| KG_IS5_                 | 9 / 33       | 7.5 / 184.5   | 12 / 63         |              |              |              |              |                 |                |          |
| KG_IS6_                 | 21 / 77      | 17.5 / 430.5  | 28 / 147        | 10.5 / 10.5  |              |              |              |                 |                |          |
| KG_IS7_                 | 21 / 77      | 17.5 / 430.5  | 28 / 147        | 10.5 / 10.5  | 24.5 / 24.5  |              |              |                 |                |          |
| KG_IS10_                | 105 / 35     | 300 / 340     | 145 / 105       | 30 / 0       | 70 / 0       | 70 / 0       |              |                 |                |          |
| KG_IS11_                | 651 / 371    | 1629 / 3043   | 885.5 / 939.5   | 207 / 12     | 483 / 28     | 483 / 28     | 260 / 470    |                 |                |          |
| KG_IS12_                | 514 / 256    | 1453 / 2067   | 714.5 / 660.5   | 159 / 6      | 371 / 14     | 371 / 14     | 234 / 316    | 2165.5 / 1849.5 |                |          |
| KG_IS13_                | 95 / 73      | 216 / 552     | 131.5 / 168.5   | 36 / 0       | 84 / 0       | 84 / 0       | 36 / 84      | 369.5 / 506.5   | 261.5 / 398.5  |          |
| z                       | KG_IS1_      | KG_IS2_       | KG_IS3_         | KG_IS5_      | KG_IS6_      | KG_IS7_      | KG_IS10_     | KG_IS11_        | KG_IS12_       | KG_IS13_ |
| KG_IS1_                 |              |               |                 |              |              |              |              |                 |                |          |
| KG_IS2_                 | 2.97         |               |                 |              |              |              |              |                 |                |          |
| KG_IS3_                 | 1.38         | 1.19          |                 |              |              |              |              |                 |                |          |
| KG_IS5_                 | 1.51         | 2.68          | 1.89            |              |              |              |              |                 |                |          |
| KG_IS6_                 | 2.09         | 3.98          | 2.71            | 0.00         |              |              |              |                 |                |          |
| KG_IS7_                 | 2.09         | 3.98          | 2.71            | 0.00         | 0.00         |              |              |                 |                |          |
| KG_IS10_                | 2.05         | 0.32          | 0.73            | 2.54         | 3.42         | 3.42         |              |                 |                |          |
| KG_IS11_                | 1.62         | 3.05          | 0.22            | 2.60         | 3.87         | 3.87         | 1.47         |                 |                |          |
| KG_IS12_                | 1.92         | 1.64          | 0.28            | 2.69         | 3.97         | 3.97         | 0.75         | 0.76            |                |          |
| KG_IS13_                | 0.57         | 2.39          | 0.60            | 2.60         | 3.55         | 3.55         | 1.58         | 0.86            | 1.12           |          |
| ES                      | KG_IS1_      | KG_IS2_       | KG_IS3_         | KG_IS5_      | KG_IS6_      | KG_IS7_      | KG_IS10_     | KG_IS11_        | KG_IS12_       | KG_IS13_ |
| KG_IS1_                 |              |               |                 |              |              |              |              |                 |                |          |
| KG_IS2_                 | 0.04         |               |                 |              |              |              |              |                 |                |          |
| KG_IS3_                 | 0.04         | 0.01          |                 |              |              |              |              |                 |                |          |
| KG_IS5_                 | 0.09         | 0.04          | 0.07            |              |              |              |              |                 |                |          |
| KG_IS6_                 | 0.10         | 0.06          | 0.08            | 0.00         |              |              |              |                 |                |          |
| KG_IS7_                 | 0.10         | 0.06          | 0.08            | 0.00         | 0.00         |              |              |                 |                |          |
| KG_IS10_                | 0.09         | 0.00          | 0.02            | 0.20         | 0.20         | 0.20         |              |                 |                |          |
| KG_IS11_                | 0.02         | 0.02          | 0.00            | 0.03         | 0.05         | 0.05         | 0.02         |                 |                |          |
| KG_IS12_                | 0.03         | 0.01          | 0.00            | 0.05         | 0.06         | 0.06         | 0.01         | 0.01            |                |          |
| KG_IS13_                | 0.02         | 0.03          | 0.02            | 0.17         | 0.19         | 0.19         | 0.07         | 0.01            | 0.02           |          |
| Degree of Association   | KG_IS1_      | KG_IS2_       | KG_IS3_         | KG_IS5_      | KG_IS6_      | KG_IS7_      | KG_IS10_     | KG_IS11_        | KG_IS12_       | KG_IS13_ |
| KG_IS1_                 |              |               |                 |              |              |              |              |                 |                |          |
| KG_IS2_                 | small        |               |                 |              |              |              |              |                 |                |          |
| KG_IS3_                 | small        | small         |                 |              |              |              |              |                 |                |          |
| KG_IS5_                 | small        | small         | small           |              |              |              |              |                 |                |          |
| KG_IS6_                 | small        | small         | small           | small        |              |              |              |                 |                |          |
| KG_IS7_                 | small        | small         | small           | small        | small        |              |              |                 |                |          |
| KG_IS10_                | small        | small         | small           | small-medium | small-medium | small-medium |              |                 |                |          |
| KG_IS11_                | small        | small         | small           | small        | small        | small        | small        |                 |                |          |
| KG_IS12_                | small        | small         | small           | small        | small        | small        | small        | small           |                |          |
| KG_IS13_                | small        | small         | small           | small-medium | small-medium | small-medium | small        | small           | small          |          |
| Significantly Different | KG_IS1_      | KG_IS2_       | KG_IS3_         | KG_IS5_      | KG_IS6_      | KG_IS7_      | KG_IS10_     | KG_IS11_        | KG_IS12_       | KG_IS13_ |
| KG_IS1_                 |              |               |                 |              |              |              |              |                 |                |          |
| KG_IS2_                 | YES          |               |                 |              |              |              |              |                 |                |          |
| KG_IS3_                 | NO           | NO            |                 |              |              |              |              |                 |                |          |
| KG_IS5_                 | NO           | YES           | NO              |              |              |              |              |                 |                |          |
| KG_IS6_                 | YES          | YES           | YES             | NO           |              |              |              |                 |                |          |
| KG_IS7_                 | YES          | YES           | YES             | NO           | NO           |              |              |                 |                |          |
| KG_IS10_                | YES          | NO            | NO              | YES          | YES          | YES          |              |                 |                |          |
| KG_IS11_                | NO           | YES           | NO              | YES          | YES          | YES          | NO           |                 |                |          |
| KG_IS12_                | NO           | NO            | NO              | YES          | YES          | YES          | NO           | NO              |                |          |
| KG_IS13_                | NO           | YES           | NO              | YES          | YES          | YES          | NO           | NO              | NO             |          |

# Kougarok Intensive Station Mann Whitney U-Test Results

## Iron

| n= (top / left / total) | KG_IS1_      | KG_IS2_       | KG_IS3_      | KG_IS5_      | KG_IS6_     | KG_IS7_      | KG_IS10_     | KG_IS11_      | KG_IS12_     | KG_IS13_ |
|-------------------------|--------------|---------------|--------------|--------------|-------------|--------------|--------------|---------------|--------------|----------|
| KG_IS1_                 |              |               |              |              |             |              |              |               |              |          |
| KG_IS2_                 | 17 / 64 / 81 |               |              |              |             |              |              |               |              |          |
| KG_IS3_                 | 17 / 25 / 42 | 64 / 25 / 89  |              |              |             |              |              |               |              |          |
| KG_IS5_                 | 17 / 3 / 20  | 64 / 3 / 67   | 25 / 3 / 28  |              |             |              |              |               |              |          |
| KG_IS6_                 | 17 / 7 / 24  | 64 / 7 / 71   | 25 / 7 / 32  |              |             |              |              |               |              |          |
| KG_IS7_                 | 17 / 7 / 24  | 64 / 7 / 71   | 25 / 7 / 32  | 3 / 7 / 10   | 7 / 7 / 14  |              |              |               |              |          |
| KG_IS10_                | 17 / 10 / 27 | 64 / 10 / 74  | 25 / 10 / 35 | 3 / 10 / 13  | 7 / 10 / 17 | 7 / 10 / 17  |              |               |              |          |
| KG_IS11_                | 17 / 73 / 90 | 64 / 73 / 137 | 25 / 73 / 98 | 3 / 73 / 76  | 7 / 73 / 80 | 7 / 73 / 80  | 10 / 73 / 83 |               |              |          |
| KG_IS12_                | 17 / 54 / 71 | 64 / 54 / 118 | 25 / 54 / 79 | 3 / 54 / 57  | 7 / 54 / 61 | 7 / 54 / 61  | 10 / 54 / 64 | 73 / 54 / 127 |              |          |
| KG_IS13_                | 17 / 12 / 29 | 64 / 12 / 76  | 25 / 12 / 37 | 3 / 12 / 15  | 7 / 12 / 19 | 7 / 12 / 19  | 10 / 12 / 22 | 73 / 12 / 85  | 54 / 12 / 66 |          |
| Σ[Rank] (top / left)    | KG_IS1_      | KG_IS2_       | KG_IS3_      | KG_IS5_      | KG_IS6_     | KG_IS7_      | KG_IS10_     | KG_IS11_      | KG_IS12_     | KG_IS13_ |
| KG_IS1_                 |              |               |              |              |             |              |              |               |              |          |
| KG_IS2_                 | 622 / 2699   |               |              |              |             |              |              |               |              |          |
| KG_IS3_                 | 491 / 412    | 3362 / 643    |              |              |             |              |              |               |              |          |
| KG_IS5_                 | 204 / 6      | 2267 / 11     | 397 / 9      |              |             |              |              |               |              |          |
| KG_IS6_                 | 222 / 78     | 2395 / 161    | 354 / 174    | 6 / 49       |             |              |              |               |              |          |
| KG_IS7_                 | 217 / 83     | 2407 / 149    | 337 / 191    | 6 / 49       | 46 / 59     |              |              |               |              |          |
| KG_IS10_                | 245 / 133    | 2517 / 258    | 352 / 278    | 6 / 85       | 60 / 93     | 53 / 100     |              |               |              |          |
| KG_IS11_                | 870 / 3225   | 5534 / 3919   | 545 / 4306   | 8 / 2918     | 255 / 2985  | 314 / 2926   | 549 / 2937   |               |              |          |
| KG_IS12_                | 749 / 1807   | 4626 / 2395   | 682 / 2478   | 6 / 1647     | 253 / 1638  | 296 / 1595   | 458 / 1622   | 5223 / 2905   |              |          |
| KG_IS13_                | 278 / 157    | 2655 / 271    | 384 / 319    | 6 / 114      | 74 / 116    | 97 / 93      | 139 / 114    | 3296 / 359    | 1791 / 420   |          |
| U (top / left)          | KG_IS1_      | KG_IS2_       | KG_IS3_      | KG_IS5_      | KG_IS6_     | KG_IS7_      | KG_IS10_     | KG_IS11_      | KG_IS12_     | KG_IS13_ |
| KG_IS1_                 |              |               |              |              |             |              |              |               |              |          |
| KG_IS2_                 | 619 / 469    |               |              |              |             |              |              |               |              |          |
| KG_IS3_                 | 87 / 338     | 318 / 1282    |              |              |             |              |              |               |              |          |
| KG_IS5_                 | 0 / 51       | 5 / 187       | 3 / 72       |              |             |              |              |               |              |          |
| KG_IS6_                 | 50 / 69      | 133 / 315     | 146 / 29     | 21 / 0       |             |              |              |               |              |          |
| KG_IS7_                 | 55 / 64      | 121 / 327     | 163 / 12     | 21 / 0       | 31 / 18     |              |              |               |              |          |
| KG_IS10_                | 78 / 92      | 203 / 437     | 223 / 27     | 30 / 0       | 38 / 32     | 45 / 25      |              |               |              |          |
| KG_IS11_                | 524 / 717    | 1218 / 3454   | 1605 / 220   | 217 / 2      | 284 / 227   | 225 / 286    | 236 / 494    |               |              |          |
| KG_IS12_                | 322 / 596    | 910 / 2546    | 993 / 357    | 162 / 0      | 153 / 225   | 110 / 268    | 137 / 403    | 1420 / 2522   |              |          |
| KG_IS13_                | 79 / 125     | 193 / 575     | 241 / 59     | 36 / 0       | 38 / 46     | 15 / 69      | 36 / 84      | 281 / 595     | 342 / 306    |          |
| z                       | KG_IS1_      | KG_IS2_       | KG_IS3_      | KG_IS5_      | KG_IS6_     | KG_IS7_      | KG_IS10_     | KG_IS11_      | KG_IS12_     | KG_IS13_ |
| KG_IS1_                 |              |               |              |              |             |              |              |               |              |          |
| KG_IS2_                 | 0.87         |               |              |              |             |              |              |               |              |          |
| KG_IS3_                 | <b>3.22</b>  | <b>4.40</b>   |              |              |             |              |              |               |              |          |
| KG_IS5_                 | <b>2.70</b>  | <b>2.76</b>   | <b>2.56</b>  |              |             |              |              |               |              |          |
| KG_IS6_                 | 0.60         | 1.76          | <b>2.67</b>  | <b>2.39</b>  |             |              |              |               |              |          |
| KG_IS7_                 | 0.29         | <b>1.99</b>   | <b>3.44</b>  | <b>2.39</b>  | 0.83        |              |              |               |              |          |
| KG_IS10_                | 0.35         | 1.85          | <b>3.58</b>  | <b>2.54</b>  | 0.29        | 0.98         |              |               |              |          |
| KG_IS11_                | 0.99         | <b>4.82</b>   | <b>5.64</b>  | <b>2.87</b>  | 0.49        | 0.52         | 1.80         |               |              |          |
| KG_IS12_                | 1.85         | <b>4.42</b>   | <b>3.35</b>  | <b>2.89</b>  | 0.81        | 1.79         | <b>2.46</b>  | <b>2.69</b>   |              |          |
| KG_IS13_                | 1.02         | <b>2.72</b>   | <b>2.95</b>  | <b>2.60</b>  | 0.34        | <b>2.28</b>  | 1.58         | <b>1.98</b>   | 0.30         |          |
| ES                      | KG_IS1_      | KG_IS2_       | KG_IS3_      | KG_IS5_      | KG_IS6_     | KG_IS7_      | KG_IS10_     | KG_IS11_      | KG_IS12_     | KG_IS13_ |
| KG_IS1_                 |              |               |              |              |             |              |              |               |              |          |
| KG_IS2_                 | 0.01         |               |              |              |             |              |              |               |              |          |
| KG_IS3_                 | 0.08         | 0.05          |              |              |             |              |              |               |              |          |
| KG_IS5_                 | 0.13         | 0.04          | 0.09         |              |             |              |              |               |              |          |
| KG_IS6_                 | 0.03         | 0.02          | 0.08         | 0.24         |             |              |              |               |              |          |
| KG_IS7_                 | 0.01         | 0.03          | 0.11         | 0.24         | 0.06        |              |              |               |              |          |
| KG_IS10_                | 0.01         | 0.02          | 0.10         | 0.20         | 0.02        | 0.06         |              |               |              |          |
| KG_IS11_                | 0.01         | 0.04          | 0.06         | 0.04         | 0.01        | 0.01         | 0.02         |               |              |          |
| KG_IS12_                | 0.03         | 0.04          | 0.04         | 0.05         | 0.01        | 0.03         | 0.04         | 0.02          |              |          |
| KG_IS13_                | 0.04         | 0.04          | 0.08         | 0.17         | 0.02        | 0.12         | 0.07         | 0.02          | 0.00         |          |
| Degree of Association   | KG_IS1_      | KG_IS2_       | KG_IS3_      | KG_IS5_      | KG_IS6_     | KG_IS7_      | KG_IS10_     | KG_IS11_      | KG_IS12_     | KG_IS13_ |
| KG_IS1_                 |              |               |              |              |             |              |              |               |              |          |
| KG_IS2_                 | small        |               |              |              |             |              |              |               |              |          |
| KG_IS3_                 | small        | small         |              |              |             |              |              |               |              |          |
| KG_IS5_                 | small-medium | small         | small        |              |             |              |              |               |              |          |
| KG_IS6_                 | small        | small         | small        | small-medium |             |              |              |               |              |          |
| KG_IS7_                 | small        | small         | small-medium | small-medium | small       |              |              |               |              |          |
| KG_IS10_                | small        | small         | small-medium | small-medium | small       | small        |              |               |              |          |
| KG_IS11_                | small        | small         | small        | small        | small       | small        | small        |               |              |          |
| KG_IS12_                | small        | small         | small        | small        | small       | small        | small        | small         |              |          |
| KG_IS13_                | small        | small         | small        | small-medium | small       | small-medium | small        | small         | small        |          |
| Significantly Different | KG_IS1_      | KG_IS2_       | KG_IS3_      | KG_IS5_      | KG_IS6_     | KG_IS7_      | KG_IS10_     | KG_IS11_      | KG_IS12_     | KG_IS13_ |
| KG_IS1_                 |              |               |              |              |             |              |              |               |              |          |
| KG_IS2_                 | NO           |               |              |              |             |              |              |               |              |          |
| KG_IS3_                 | YES          | YES           |              |              |             |              |              |               |              |          |
| KG_IS5_                 | YES          | YES           | YES          |              |             |              |              |               |              |          |
| KG_IS6_                 | NO           | NO            | YES          | YES          |             |              |              |               |              |          |
| KG_IS7_                 | NO           | YES           | YES          | YES          | NO          |              |              |               |              |          |
| KG_IS10_                | NO           | NO            | YES          | YES          | NO          | NO           |              |               |              |          |
| KG_IS11_                | NO           | YES           | YES          | YES          | NO          | NO           | NO           |               |              |          |
| KG_IS12_                | NO           | YES           | YES          | YES          | NO          | NO           | YES          | YES           |              |          |
| KG_IS13_                | NO           | YES           | YES          | YES          | NO          | YES          | NO           | YES           | NO           |          |

# Kougarok Intensive Station Mann Whitney U-Test Results

## Lithium

| n= (top / left / total) | KG_IS1_        | KG_IS2_         | KG_IS3_      | KG_IS5_      | KG_IS6_        | KG_IS7_      | KG_IS10_     | KG_IS11_      | KG_IS12_     | KG_IS13_ |
|-------------------------|----------------|-----------------|--------------|--------------|----------------|--------------|--------------|---------------|--------------|----------|
| KG_IS1_                 |                |                 |              |              |                |              |              |               |              |          |
| KG_IS2_                 | 17 / 64 / 81   |                 |              |              |                |              |              |               |              |          |
| KG_IS3_                 | 17 / 25 / 42   | 64 / 25 / 89    |              |              |                |              |              |               |              |          |
| KG_IS5_                 | 17 / 3 / 20    | 64 / 3 / 67     | 25 / 3 / 28  |              |                |              |              |               |              |          |
| KG_IS6_                 | 17 / 7 / 24    | 64 / 7 / 71     | 25 / 7 / 32  |              |                |              |              |               |              |          |
| KG_IS7_                 | 17 / 7 / 24    | 64 / 7 / 71     | 25 / 7 / 32  | 3 / 7 / 10   | 7 / 7 / 14     |              |              |               |              |          |
| KG_IS10_                | 17 / 10 / 27   | 64 / 10 / 74    | 25 / 10 / 35 | 3 / 10 / 13  | 7 / 10 / 17    | 7 / 10 / 17  |              |               |              |          |
| KG_IS11_                | 17 / 73 / 90   | 64 / 73 / 137   | 25 / 73 / 98 | 3 / 73 / 76  | 7 / 73 / 80    | 7 / 73 / 80  | 10 / 73 / 83 |               |              |          |
| KG_IS12_                | 17 / 54 / 71   | 64 / 54 / 118   | 25 / 54 / 79 | 3 / 54 / 57  | 7 / 54 / 61    | 7 / 54 / 61  | 10 / 54 / 64 | 73 / 54 / 127 |              |          |
| KG_IS13_                | 17 / 12 / 29   | 64 / 12 / 76    | 25 / 12 / 37 | 3 / 12 / 15  | 7 / 12 / 19    | 7 / 12 / 19  | 10 / 12 / 22 | 73 / 12 / 85  | 54 / 12 / 66 |          |
| Σ[Rank] (top / left)    | KG_IS1_        | KG_IS2_         | KG_IS3_      | KG_IS5_      | KG_IS6_        | KG_IS7_      | KG_IS10_     | KG_IS11_      | KG_IS12_     | KG_IS13_ |
| KG_IS1_                 |                |                 |              |              |                |              |              |               |              |          |
| KG_IS2_                 | 913.5 / 2407.5 |                 |              |              |                |              |              |               |              |          |
| KG_IS3_                 | 462 / 441      | 2938 / 1067     |              |              |                |              |              |               |              |          |
| KG_IS5_                 | 190 / 20       | 2170 / 108      | 355 / 51     |              |                |              |              |               |              |          |
| KG_IS6_                 | 246.5 / 53.5   | 2335.5 / 220.5  | 419 / 109    | 18 / 37      |                |              |              |               |              |          |
| KG_IS7_                 | 236 / 64       | 2299 / 257      | 404 / 124    | 17 / 38      | 48 / 57        |              |              |               |              |          |
| KG_IS10_                | 250 / 128      | 2313 / 462      | 410 / 220    | 16 / 75      | 47 / 106       | 54 / 99      |              |               |              |          |
| KG_IS11_                | 1168 / 2927    | 4988 / 4465     | 1386 / 3465  | 168 / 2758   | 325 / 2915     | 373 / 2867   | 593 / 2893   |               |              |          |
| KG_IS12_                | 735.5 / 1820.5 | 3555.5 / 3465.5 | 855 / 2305   | 78 / 1575    | 160.5 / 1730.5 | 197 / 1694   | 355 / 1725   | 3952 / 4176   |              |          |
| KG_IS13_                | 343 / 92       | 2630 / 296      | 525 / 178    | 38 / 82      | 85 / 105       | 93 / 97      | 157 / 96     | 3188 / 467    | 1993 / 218   |          |
| U (top / left)          | KG_IS1_        | KG_IS2_         | KG_IS3_      | KG_IS5_      | KG_IS6_        | KG_IS7_      | KG_IS10_     | KG_IS11_      | KG_IS12_     | KG_IS13_ |
| KG_IS1_                 |                |                 |              |              |                |              |              |               |              |          |
| KG_IS2_                 | 327.5 / 760.5  |                 |              |              |                |              |              |               |              |          |
| KG_IS3_                 | 116 / 309      | 742 / 858       |              |              |                |              |              |               |              |          |
| KG_IS5_                 | 14 / 37        | 102 / 90        | 45 / 30      |              |                |              |              |               |              |          |
| KG_IS6_                 | 25.5 / 93.5    | 192.5 / 255.5   | 81 / 94      | 9 / 12       |                |              |              |               |              |          |
| KG_IS7_                 | 36 / 83        | 229 / 219       | 96 / 79      | 10 / 11      | 29 / 20        |              |              |               |              |          |
| KG_IS10_                | 73 / 97        | 407 / 233       | 165 / 85     | 20 / 10      | 51 / 19        | 44 / 26      |              |               |              |          |
| KG_IS11_                | 226 / 1015     | 1764 / 2908     | 764 / 1061   | 57 / 162     | 214 / 297      | 166 / 345    | 192 / 538    |               |              |          |
| KG_IS12_                | 335.5 / 582.5  | 1980.5 / 1475.5 | 820 / 530    | 90 / 72      | 245.5 / 132.5  | 209 / 169    | 240 / 300    | 2691 / 1251   |              |          |
| KG_IS13_                | 14 / 190       | 218 / 550       | 100 / 200    | 4 / 32       | 27 / 57        | 19 / 65      | 18 / 102     | 389 / 487     | 140 / 508    |          |
| z                       | KG_IS1_        | KG_IS2_         | KG_IS3_      | KG_IS5_      | KG_IS6_        | KG_IS7_      | KG_IS10_     | KG_IS11_      | KG_IS12_     | KG_IS13_ |
| KG_IS1_                 |                |                 |              |              |                |              |              |               |              |          |
| KG_IS2_                 | 2.51           |                 |              |              |                |              |              |               |              |          |
| KG_IS3_                 | 2.47           | 0.53            |              |              |                |              |              |               |              |          |
| KG_IS5_                 | 1.22           | 0.18            | 0.56         |              |                |              |              |               |              |          |
| KG_IS6_                 | 2.16           | 0.61            | 0.30         | 0.34         |                |              |              |               |              |          |
| KG_IS7_                 | 1.49           | 0.10            | 0.39         | 0.11         | 0.57           |              |              |               |              |          |
| KG_IS10_                | 0.60           | 1.38            | 1.46         | 0.85         | 1.56           | 0.88         |              |               |              |          |
| KG_IS11_                | 4.07           | 2.47            | 1.21         | 1.40         | 0.71           | 1.52         | 2.42         |               |              |          |
| KG_IS12_                | 1.66           | 1.36            | 1.53         | 0.32         | 1.28           | 0.45         | 0.55         | 3.51          |              |          |
| KG_IS13_                | 3.90           | 2.36            | 1.62         | 2.02         | 1.27           | 1.94         | 2.77         | 0.62          | 3.06         |          |
| ES                      | KG_IS1_        | KG_IS2_         | KG_IS3_      | KG_IS5_      | KG_IS6_        | KG_IS7_      | KG_IS10_     | KG_IS11_      | KG_IS12_     | KG_IS13_ |
| KG_IS1_                 |                |                 |              |              |                |              |              |               |              |          |
| KG_IS2_                 | 0.03           |                 |              |              |                |              |              |               |              |          |
| KG_IS3_                 | 0.06           | 0.01            |              |              |                |              |              |               |              |          |
| KG_IS5_                 | 0.06           | 0.00            | 0.02         |              |                |              |              |               |              |          |
| KG_IS6_                 | 0.09           | 0.01            | 0.01         | 0.03         |                |              |              |               |              |          |
| KG_IS7_                 | 0.06           | 0.00            | 0.01         | 0.01         | 0.04           |              |              |               |              |          |
| KG_IS10_                | 0.02           | 0.02            | 0.04         | 0.07         | 0.09           | 0.05         |              |               |              |          |
| KG_IS11_                | 0.05           | 0.02            | 0.01         | 0.02         | 0.01           | 0.02         | 0.03         |               |              |          |
| KG_IS12_                | 0.02           | 0.01            | 0.02         | 0.01         | 0.02           | 0.01         | 0.01         | 0.03          |              |          |
| KG_IS13_                | 0.13           | 0.03            | 0.04         | 0.13         | 0.07           | 0.10         | 0.13         | 0.01          | 0.05         |          |
| Degree of Association   | KG_IS1_        | KG_IS2_         | KG_IS3_      | KG_IS5_      | KG_IS6_        | KG_IS7_      | KG_IS10_     | KG_IS11_      | KG_IS12_     | KG_IS13_ |
| KG_IS1_                 |                |                 |              |              |                |              |              |               |              |          |
| KG_IS2_                 | small          |                 |              |              |                |              |              |               |              |          |
| KG_IS3_                 | small          | small           |              |              |                |              |              |               |              |          |
| KG_IS5_                 | small          | small           | small        |              |                |              |              |               |              |          |
| KG_IS6_                 | small          | small           | small        | small        |                |              |              |               |              |          |
| KG_IS7_                 | small          | small           | small        | small        | small          |              |              |               |              |          |
| KG_IS10_                | small          | small           | small        | small        | small          | small        |              |               |              |          |
| KG_IS11_                | small          | small           | small        | small        | small          | small        | small        |               |              |          |
| KG_IS12_                | small          | small           | small        | small        | small          | small        | small        | small         |              |          |
| KG_IS13_                | small-medium   | small           | small        | small-medium | small          | small-medium | small-medium | small         | small        |          |
| Significantly Different | KG_IS1_        | KG_IS2_         | KG_IS3_      | KG_IS5_      | KG_IS6_        | KG_IS7_      | KG_IS10_     | KG_IS11_      | KG_IS12_     | KG_IS13_ |
| KG_IS1_                 |                |                 |              |              |                |              |              |               |              |          |
| KG_IS2_                 | YES            |                 |              |              |                |              |              |               |              |          |
| KG_IS3_                 | YES            | NO              |              |              |                |              |              |               |              |          |
| KG_IS5_                 | NO             | NO              | NO           |              |                |              |              |               |              |          |
| KG_IS6_                 | YES            | NO              | NO           | NO           |                |              |              |               |              |          |
| KG_IS7_                 | NO             | NO              | NO           | NO           | NO             |              |              |               |              |          |
| KG_IS10_                | NO             | NO              | NO           | NO           | NO             | NO           |              |               |              |          |
| KG_IS11_                | YES            | YES             | NO           | NO           | NO             | NO           | YES          |               |              |          |
| KG_IS12_                | NO             | NO              | NO           | NO           | NO             | NO           | NO           | YES           |              |          |
| KG_IS13_                | YES            | YES             | NO           | YES          | NO             | NO           | YES          | NO            | YES          |          |

# Kougarok Intensive Station Mann Whitney U-Test Results

## Magnesium

| n= (top / left / total) | KG_IS1_      | KG_IS2_       | KG_IS3_      | KG_IS5_      | KG_IS6_      | KG_IS7_      | KG_IS10_     | KG_IS11_      | KG_IS12_     | KG_IS13_ |
|-------------------------|--------------|---------------|--------------|--------------|--------------|--------------|--------------|---------------|--------------|----------|
| KG_IS1_                 |              |               |              |              |              |              |              |               |              |          |
| KG_IS2_                 | 17 / 64 / 81 |               |              |              |              |              |              |               |              |          |
| KG_IS3_                 | 17 / 25 / 42 | 64 / 25 / 89  |              |              |              |              |              |               |              |          |
| KG_IS5_                 | 17 / 3 / 20  | 64 / 3 / 67   | 25 / 3 / 28  |              |              |              |              |               |              |          |
| KG_IS6_                 | 17 / 7 / 24  | 64 / 7 / 71   | 25 / 7 / 32  |              |              |              |              |               |              |          |
| KG_IS7_                 | 17 / 7 / 24  | 64 / 7 / 71   | 25 / 7 / 32  | 3 / 7 / 10   | 7 / 7 / 14   |              |              |               |              |          |
| KG_IS10_                | 17 / 10 / 27 | 64 / 10 / 74  | 25 / 10 / 35 | 3 / 10 / 13  | 7 / 10 / 17  | 7 / 10 / 17  |              |               |              |          |
| KG_IS11_                | 17 / 73 / 90 | 64 / 73 / 137 | 25 / 73 / 98 | 3 / 73 / 76  | 7 / 73 / 80  | 7 / 73 / 80  | 10 / 73 / 83 |               |              |          |
| KG_IS12_                | 17 / 54 / 71 | 64 / 54 / 118 | 25 / 54 / 79 | 3 / 54 / 57  | 7 / 54 / 61  | 7 / 54 / 61  | 10 / 54 / 64 | 73 / 54 / 127 |              |          |
| KG_IS13_                | 17 / 12 / 29 | 64 / 12 / 76  | 25 / 12 / 37 | 3 / 12 / 15  | 7 / 12 / 19  | 7 / 12 / 19  | 10 / 12 / 22 | 73 / 12 / 85  | 54 / 12 / 66 |          |
| Σ[Rank] (top / left)    | KG_IS1_      | KG_IS2_       | KG_IS3_      | KG_IS5_      | KG_IS6_      | KG_IS7_      | KG_IS10_     | KG_IS11_      | KG_IS12_     | KG_IS13_ |
| KG_IS1_                 |              |               |              |              |              |              |              |               |              |          |
| KG_IS2_                 | 875 / 2446   |               |              |              |              |              |              |               |              |          |
| KG_IS3_                 | 478 / 425    | 3298 / 707    |              |              |              |              |              |               |              |          |
| KG_IS5_                 | 186 / 24     | 2156 / 122    | 339 / 67     |              |              |              |              |               |              |          |
| KG_IS6_                 | 223 / 77     | 2274 / 282    | 365 / 163    | 18 / 37      |              |              |              |               |              |          |
| KG_IS7_                 | 232 / 68     | 2286 / 270    | 373 / 155    | 18 / 37      | 54 / 51      |              |              |               |              |          |
| KG_IS10_                | 269 / 109    | 2416 / 359    | 389 / 241    | 25 / 66      | 70 / 83      | 65 / 88      |              |               |              |          |
| KG_IS11_                | 1225 / 2870  | 6461 / 2992   | 1100 / 3751  | 224 / 2702   | 463 / 2777   | 464 / 2776   | 719 / 2767   |               |              |          |
| KG_IS12_                | 910 / 1646   | 4996 / 2025   | 973 / 2187   | 152 / 1501   | 337 / 1554   | 333 / 1558   | 500 / 1580   | 4599 / 3529   |              |          |
| KG_IS13_                | 333 / 102    | 2848 / 78     | 488 / 215    | 42 / 78      | 102 / 88     | 102 / 88     | 174 / 79     | 3449 / 206    | 1952 / 259   |          |
| U (top / left)          | KG_IS1_      | KG_IS2_       | KG_IS3_      | KG_IS5_      | KG_IS6_      | KG_IS7_      | KG_IS10_     | KG_IS11_      | KG_IS12_     | KG_IS13_ |
| KG_IS1_                 |              |               |              |              |              |              |              |               |              |          |
| KG_IS2_                 | 366 / 722    |               |              |              |              |              |              |               |              |          |
| KG_IS3_                 | 100 / 325    | 382 / 1218    |              |              |              |              |              |               |              |          |
| KG_IS5_                 | 18 / 33      | 116 / 76      | 61 / 14      |              |              |              |              |               |              |          |
| KG_IS6_                 | 49 / 70      | 254 / 194     | 135 / 40     | 9 / 12       |              |              |              |               |              |          |
| KG_IS7_                 | 40 / 79      | 242 / 206     | 127 / 48     | 9 / 12       | 23 / 26      |              |              |               |              |          |
| KG_IS10_                | 54 / 116     | 304 / 336     | 186 / 64     | 11 / 19      | 28 / 42      | 33 / 37      |              |               |              |          |
| KG_IS11_                | 169 / 1072   | 291 / 4381    | 1050 / 775   | 1 / 218      | 76 / 435     | 75 / 436     | 66 / 664     |               |              |          |
| KG_IS12_                | 161 / 757    | 540 / 2916    | 702 / 648    | 16 / 146     | 69 / 309     | 73 / 305     | 95 / 445     | 2044 / 1898   |              |          |
| KG_IS13_                | 24 / 180     | 0 / 768       | 137 / 163    | 0 / 36       | 10 / 74      | 10 / 74      | 1 / 119      | 128 / 748     | 181 / 467    |          |
| z                       | KG_IS1_      | KG_IS2_       | KG_IS3_      | KG_IS5_      | KG_IS6_      | KG_IS7_      | KG_IS10_     | KG_IS11_      | KG_IS12_     | KG_IS13_ |
| KG_IS1_                 |              |               |              |              |              |              |              |               |              |          |
| KG_IS2_                 | 2.06         |               |              |              |              |              |              |               |              |          |
| KG_IS3_                 | 2.88         | 3.82          |              |              |              |              |              |               |              |          |
| KG_IS5_                 | 0.79         | 0.61          | 1.75         |              |              |              |              |               |              |          |
| KG_IS6_                 | 0.67         | 0.58          | 2.17         | 0.34         |              |              |              |               |              |          |
| KG_IS7_                 | 1.24         | 0.35          | 1.80         | 0.34         | 0.19         |              |              |               |              |          |
| KG_IS10_                | 1.56         | 0.25          | 2.23         | 0.68         | 0.68         | 0.20         |              |               |              |          |
| KG_IS11_                | 4.65         | 8.82          | 1.12         | 2.89         | 3.06         | 3.07         | 4.18         |               |              |          |
| KG_IS12_                | 4.02         | 6.42          | 0.28         | 2.32         | 2.72         | 2.62         | 3.24         | 0.36          |              |          |
| KG_IS13_                | 3.45         | 5.47          | 0.42         | 2.60         | 2.70         | 2.70         | 3.89         | 3.91          | 2.38         |          |
| ES                      | KG_IS1_      | KG_IS2_       | KG_IS3_      | KG_IS5_      | KG_IS6_      | KG_IS7_      | KG_IS10_     | KG_IS11_      | KG_IS12_     | KG_IS13_ |
| KG_IS1_                 |              |               |              |              |              |              |              |               |              |          |
| KG_IS2_                 | 0.03         |               |              |              |              |              |              |               |              |          |
| KG_IS3_                 | 0.07         | 0.04          |              |              |              |              |              |               |              |          |
| KG_IS5_                 | 0.04         | 0.01          | 0.06         |              |              |              |              |               |              |          |
| KG_IS6_                 | 0.03         | 0.01          | 0.07         | 0.03         |              |              |              |               |              |          |
| KG_IS7_                 | 0.05         | 0.00          | 0.06         | 0.03         | 0.01         |              |              |               |              |          |
| KG_IS10_                | 0.06         | 0.00          | 0.06         | 0.05         | 0.04         | 0.01         |              |               |              |          |
| KG_IS11_                | 0.05         | 0.06          | 0.01         | 0.04         | 0.04         | 0.04         | 0.05         |               |              |          |
| KG_IS12_                | 0.06         | 0.05          | 0.00         | 0.04         | 0.04         | 0.04         | 0.05         | 0.00          |              |          |
| KG_IS13_                | 0.12         | 0.07          | 0.01         | 0.17         | 0.14         | 0.14         | 0.18         | 0.05          | 0.04         |          |
| Degree of Association   | KG_IS1_      | KG_IS2_       | KG_IS3_      | KG_IS5_      | KG_IS6_      | KG_IS7_      | KG_IS10_     | KG_IS11_      | KG_IS12_     | KG_IS13_ |
| KG_IS1_                 |              |               |              |              |              |              |              |               |              |          |
| KG_IS2_                 | small        |               |              |              |              |              |              |               |              |          |
| KG_IS3_                 | small        | small         |              |              |              |              |              |               |              |          |
| KG_IS5_                 | small        | small         | small        |              |              |              |              |               |              |          |
| KG_IS6_                 | small        | small         | small        | small        |              |              |              |               |              |          |
| KG_IS7_                 | small        | small         | small        | small        | small        |              |              |               |              |          |
| KG_IS10_                | small        | small         | small        | small        | small        | small        |              |               |              |          |
| KG_IS11_                | small        | small         | small        | small        | small        | small        | small        |               |              |          |
| KG_IS12_                | small        | small         | small        | small        | small        | small        | small        | small         |              |          |
| KG_IS13_                | small-medium | small         | small        | small-medium | small-medium | small-medium | small-medium | small         | small        |          |
| Significantly Different | KG_IS1_      | KG_IS2_       | KG_IS3_      | KG_IS5_      | KG_IS6_      | KG_IS7_      | KG_IS10_     | KG_IS11_      | KG_IS12_     | KG_IS13_ |
| KG_IS1_                 |              |               |              |              |              |              |              |               |              |          |
| KG_IS2_                 | YES          |               |              |              |              |              |              |               |              |          |
| KG_IS3_                 | YES          | YES           |              |              |              |              |              |               |              |          |
| KG_IS5_                 | NO           | NO            | NO           |              |              |              |              |               |              |          |
| KG_IS6_                 | NO           | NO            | YES          | NO           |              |              |              |               |              |          |
| KG_IS7_                 | NO           | NO            | NO           | NO           | NO           |              |              |               |              |          |
| KG_IS10_                | NO           | NO            | YES          | NO           | NO           | NO           |              |               |              |          |
| KG_IS11_                | YES          | YES           | NO           | YES          | YES          | YES          | YES          |               |              |          |
| KG_IS12_                | YES          | YES           | NO           | YES          | YES          | YES          | YES          | NO            |              |          |
| KG_IS13_                | YES          | YES           | NO           | YES          | YES          | YES          | YES          | YES           | YES          |          |

# Kougarok Intensive Station Mann Whitney U-Test Results

## Manganese

| n= (top / left / total) | KG_IS1_      | KG_IS2_        | KG_IS3_      | KG_IS5_      | KG_IS6_      | KG_IS7_      | KG_IS10_     | KG_IS11_      | KG_IS12_     | KG_IS13_ |
|-------------------------|--------------|----------------|--------------|--------------|--------------|--------------|--------------|---------------|--------------|----------|
| KG_IS1_                 |              |                |              |              |              |              |              |               |              |          |
| KG_IS2_                 | 17 / 64 / 81 |                |              |              |              |              |              |               |              |          |
| KG_IS3_                 | 17 / 25 / 42 | 64 / 25 / 89   |              |              |              |              |              |               |              |          |
| KG_IS5_                 | 17 / 3 / 20  | 64 / 3 / 67    | 25 / 3 / 28  |              |              |              |              |               |              |          |
| KG_IS6_                 | 17 / 7 / 24  | 64 / 7 / 71    | 25 / 7 / 32  |              |              |              |              |               |              |          |
| KG_IS7_                 | 17 / 7 / 24  | 64 / 7 / 71    | 25 / 7 / 32  | 3 / 7 / 10   | 7 / 7 / 14   |              |              |               |              |          |
| KG_IS10_                | 17 / 10 / 27 | 64 / 10 / 74   | 25 / 10 / 35 | 3 / 10 / 13  | 7 / 10 / 17  | 7 / 10 / 17  |              |               |              |          |
| KG_IS11_                | 17 / 73 / 90 | 64 / 73 / 137  | 25 / 73 / 98 | 3 / 73 / 76  | 7 / 73 / 80  | 7 / 73 / 80  | 10 / 73 / 83 |               |              |          |
| KG_IS12_                | 17 / 54 / 71 | 64 / 54 / 118  | 25 / 54 / 79 | 3 / 54 / 57  | 7 / 54 / 61  | 7 / 54 / 61  | 10 / 54 / 64 | 73 / 54 / 127 |              |          |
| KG_IS13_                | 17 / 12 / 29 | 64 / 12 / 76   | 25 / 12 / 37 | 3 / 12 / 15  | 7 / 12 / 19  | 7 / 12 / 19  | 10 / 12 / 22 | 73 / 12 / 85  | 54 / 12 / 66 |          |
| Σ[Rank] (top / left)    | KG_IS1_      | KG_IS2_        | KG_IS3_      | KG_IS5_      | KG_IS6_      | KG_IS7_      | KG_IS10_     | KG_IS11_      | KG_IS12_     | KG_IS13_ |
| KG_IS1_                 |              |                |              |              |              |              |              |               |              |          |
| KG_IS2_                 | 611 / 2710   |                |              |              |              |              |              |               |              |          |
| KG_IS3_                 | 481 / 422    | 3385 / 620     |              |              |              |              |              |               |              |          |
| KG_IS5_                 | 201 / 9      | 2258 / 20      | 388 / 18     |              |              |              |              |               |              |          |
| KG_IS6_                 | 207 / 93     | 2337 / 219     | 346 / 182    | 6 / 49       |              |              |              |               |              |          |
| KG_IS7_                 | 212 / 88     | 2358 / 198     | 372 / 156    | 8 / 47       | 56 / 49      |              |              |               |              |          |
| KG_IS10_                | 244 / 134    | 2491 / 284     | 383 / 247    | 7 / 84       | 72 / 81      | 66 / 87      |              |               |              |          |
| KG_IS11_                | 1206 / 2889  | 6113 / 3340    | 1662 / 3189  | 73 / 2853    | 510 / 2730   | 461 / 2779   | 699 / 2787   |               |              |          |
| KG_IS12_                | 906 / 1650   | 5025 / 1996.5  | 1203 / 1957  | 44 / 1609    | 378 / 1513   | 328 / 1563   | 519 / 1561   | 4129 / 3999   |              |          |
| KG_IS13_                | 332 / 103    | 2759.5 / 166.5 | 537 / 166    | 17 / 103     | 108 / 82     | 103 / 87     | 162 / 91     | 3187 / 468    | 1904 / 307   |          |
| U (top / left)          | KG_IS1_      | KG_IS2_        | KG_IS3_      | KG_IS5_      | KG_IS6_      | KG_IS7_      | KG_IS10_     | KG_IS11_      | KG_IS12_     | KG_IS13_ |
| KG_IS1_                 |              |                |              |              |              |              |              |               |              |          |
| KG_IS2_                 | 630 / 458    |                |              |              |              |              |              |               |              |          |
| KG_IS3_                 | 97 / 328     | 295 / 1305     |              |              |              |              |              |               |              |          |
| KG_IS5_                 | 3 / 48       | 14 / 178       | 12 / 63      |              |              |              |              |               |              |          |
| KG_IS6_                 | 65 / 54      | 191 / 257      | 154 / 21     | 21 / 0       |              |              |              |               |              |          |
| KG_IS7_                 | 60 / 59      | 170 / 278      | 128 / 47     | 19 / 2       | 21 / 28      |              |              |               |              |          |
| KG_IS10_                | 79 / 91      | 229 / 411      | 192 / 58     | 29 / 1       | 26 / 44      | 32 / 38      |              |               |              |          |
| KG_IS11_                | 188 / 1053   | 639 / 4033     | 488 / 1337   | 152 / 67     | 29 / 482     | 78 / 433     | 86 / 644     |               |              |          |
| KG_IS12_                | 165 / 753    | 511 / 2945     | 472 / 878    | 124 / 38     | 28 / 350     | 78 / 300     | 76 / 464     | 2514 / 1428   |              |          |
| KG_IS13_                | 25 / 179     | 88.5 / 679.5   | 88 / 212     | 25 / 11      | 4 / 80       | 9 / 75       | 13 / 107     | 390 / 486     | 229 / 419    |          |
| z                       | KG_IS1_      | KG_IS2_        | KG_IS3_      | KG_IS5_      | KG_IS6_      | KG_IS7_      | KG_IS10_     | KG_IS11_      | KG_IS12_     | KG_IS13_ |
| KG_IS1_                 |              |                |              |              |              |              |              |               |              |          |
| KG_IS2_                 | 1.00         |                |              |              |              |              |              |               |              |          |
| KG_IS3_                 | 2.96         | 4.61           |              |              |              |              |              |               |              |          |
| KG_IS5_                 | 2.38         | 2.49           | 1.89         |              |              |              |              |               |              |          |
| KG_IS6_                 | 0.35         | 0.64           | 3.03         | 2.39         |              |              |              |               |              |          |
| KG_IS7_                 | 0.03         | 1.04           | 1.85         | 1.94         | 0.45         |              |              |               |              |          |
| KG_IS10_                | 0.30         | 1.44           | 2.45         | 2.37         | 0.88         | 0.29         |              |               |              |          |
| KG_IS11_                | 4.46         | 7.32           | 3.46         | 1.13         | 3.86         | 3.02         | 3.90         |               |              |          |
| KG_IS12_                | 3.96         | 6.57           | 2.14         | 1.54         | 3.64         | 2.51         | 3.59         | 2.65          |              |          |
| KG_IS13_                | 3.41         | 4.21           | 2.01         | 1.01         | 3.21         | 2.79         | 3.10         | 0.61          | 1.58         |          |
| ES                      | KG_IS1_      | KG_IS2_        | KG_IS3_      | KG_IS5_      | KG_IS6_      | KG_IS7_      | KG_IS10_     | KG_IS11_      | KG_IS12_     | KG_IS13_ |
| KG_IS1_                 |              |                |              |              |              |              |              |               |              |          |
| KG_IS2_                 | 0.01         |                |              |              |              |              |              |               |              |          |
| KG_IS3_                 | 0.07         | 0.05           |              |              |              |              |              |               |              |          |
| KG_IS5_                 | 0.12         | 0.04           | 0.07         |              |              |              |              |               |              |          |
| KG_IS6_                 | 0.01         | 0.01           | 0.09         | 0.24         |              |              |              |               |              |          |
| KG_IS7_                 | 0.00         | 0.01           | 0.06         | 0.19         | 0.03         |              |              |               |              |          |
| KG_IS10_                | 0.01         | 0.02           | 0.07         | 0.18         | 0.05         | 0.02         |              |               |              |          |
| KG_IS11_                | 0.05         | 0.05           | 0.04         | 0.01         | 0.05         | 0.04         | 0.05         |               |              |          |
| KG_IS12_                | 0.06         | 0.06           | 0.03         | 0.03         | 0.06         | 0.04         | 0.06         | 0.02          |              |          |
| KG_IS13_                | 0.12         | 0.06           | 0.05         | 0.07         | 0.17         | 0.15         | 0.14         | 0.01          | 0.02         |          |
| Degree of Association   | KG_IS1_      | KG_IS2_        | KG_IS3_      | KG_IS5_      | KG_IS6_      | KG_IS7_      | KG_IS10_     | KG_IS11_      | KG_IS12_     | KG_IS13_ |
| KG_IS1_                 |              |                |              |              |              |              |              |               |              |          |
| KG_IS2_                 | small        |                |              |              |              |              |              |               |              |          |
| KG_IS3_                 | small        | small          |              |              |              |              |              |               |              |          |
| KG_IS5_                 | small-medium | small          | small        |              |              |              |              |               |              |          |
| KG_IS6_                 | small        | small          | small        | small-medium |              |              |              |               |              |          |
| KG_IS7_                 | small        | small          | small        | small-medium | small        |              |              |               |              |          |
| KG_IS10_                | small        | small          | small        | small-medium | small        | small        |              |               |              |          |
| KG_IS11_                | small        | small          | small        | small        | small        | small        | small        |               |              |          |
| KG_IS12_                | small        | small          | small        | small        | small        | small        | small        | small         |              |          |
| KG_IS13_                | small-medium | small          | small        | small        | small-medium | small-medium | small-medium | small         | small        |          |
| Significantly Different | KG_IS1_      | KG_IS2_        | KG_IS3_      | KG_IS5_      | KG_IS6_      | KG_IS7_      | KG_IS10_     | KG_IS11_      | KG_IS12_     | KG_IS13_ |
| KG_IS1_                 |              |                |              |              |              |              |              |               |              |          |
| KG_IS2_                 | NO           |                |              |              |              |              |              |               |              |          |
| KG_IS3_                 | YES          | YES            |              |              |              |              |              |               |              |          |
| KG_IS5_                 | YES          | YES            | NO           |              |              |              |              |               |              |          |
| KG_IS6_                 | NO           | NO             | YES          | YES          |              |              |              |               |              |          |
| KG_IS7_                 | NO           | NO             | NO           | NO           | NO           |              |              |               |              |          |
| KG_IS10_                | NO           | NO             | YES          | YES          | NO           | NO           |              |               |              |          |
| KG_IS11_                | YES          | YES            | YES          | NO           | YES          | YES          | YES          |               |              |          |
| KG_IS12_                | YES          | YES            | YES          | NO           | YES          | YES          | YES          | YES           |              |          |
| KG_IS13_                | YES          | YES            | YES          | NO           | YES          | YES          | YES          | NO            | NO           |          |





# Kougarok Intensive Station Mann Whitney U-Test Results

## Nitrite

| n= (top / left / total) | KG_IS1_        | KG_IS2_         | KG_IS3_      | KG_IS5_      | KG_IS6_      | KG_IS7_        | KG_IS10_     | KG_IS11_      | KG_IS12_       | KG_IS13_ |
|-------------------------|----------------|-----------------|--------------|--------------|--------------|----------------|--------------|---------------|----------------|----------|
| KG_IS1_                 | 14 / 64 / 78   |                 |              |              |              |                |              |               |                |          |
| KG_IS2_                 | 14 / 25 / 39   | 64 / 25 / 89    |              |              |              |                |              |               |                |          |
| KG_IS3_                 | 14 / 3 / 17    | 64 / 3 / 67     | 25 / 3 / 28  |              |              |                |              |               |                |          |
| KG_IS5_                 | 14 / 6 / 20    | 64 / 6 / 70     | 25 / 6 / 31  |              |              |                |              |               |                |          |
| KG_IS6_                 | 14 / 7 / 21    | 64 / 7 / 71     | 25 / 7 / 32  | 3 / 7 / 10   | 6 / 7 / 13   |                |              |               |                |          |
| KG_IS7_                 | 14 / 10 / 24   | 64 / 10 / 74    | 25 / 10 / 35 | 3 / 10 / 13  | 6 / 10 / 16  | 7 / 10 / 17    |              |               |                |          |
| KG_IS10_                | 14 / 73 / 87   | 64 / 73 / 137   | 25 / 73 / 98 | 3 / 73 / 76  | 6 / 73 / 79  | 7 / 73 / 80    | 10 / 73 / 83 |               |                |          |
| KG_IS11_                | 14 / 55 / 69   | 64 / 55 / 119   | 25 / 55 / 80 | 3 / 55 / 58  | 6 / 55 / 61  | 7 / 55 / 62    | 10 / 55 / 65 | 73 / 55 / 128 |                |          |
| KG_IS12_                | 14 / 12 / 26   | 64 / 12 / 76    | 25 / 12 / 37 | 3 / 12 / 15  | 6 / 12 / 18  | 7 / 12 / 19    | 10 / 12 / 22 | 73 / 12 / 85  | 55 / 12 / 67   |          |
| KG_IS13_                |                |                 |              |              |              |                |              |               |                |          |
| Σ[Rank] (top / left)    | KG_IS1_        | KG_IS2_         | KG_IS3_      | KG_IS5_      | KG_IS6_      | KG_IS7_        | KG_IS10_     | KG_IS11_      | KG_IS12_       | KG_IS13_ |
| KG_IS1_                 | 399 / 2682     |                 |              |              |              |                |              |               |                |          |
| KG_IS2_                 | 215 / 565      | 2848.5 / 1156.5 |              |              |              |                |              |               |                |          |
| KG_IS3_                 | 109 / 44       | 2131.5 / 146.5  | 345 / 61     |              |              |                |              |               |                |          |
| KG_IS5_                 | 156 / 54       | 2368 / 117      | 439 / 57     | 24 / 21      |              |                |              |               |                |          |
| KG_IS6_                 | 164.5 / 66.5   | 2416 / 140      | 458 / 70     | 27 / 28      | 42 / 49      |                |              |               |                |          |
| KG_IS7_                 | 163 / 137      | 2472 / 303      | 487 / 143    | 32 / 59      | 39 / 97      | 49 / 104       |              |               |                |          |
| KG_IS10_                | 262.5 / 3565.5 | 3685.5 / 5767.5 | 1011 / 3840  | 133 / 2793   | 66 / 3094    | 80.5 / 3159.5  | 185 / 3301   |               |                |          |
| KG_IS11_                | 299.5 / 2115.5 | 3553 / 3587     | 940 / 2300   | 113 / 1598   | 84 / 1807    | 101.5 / 1851.5 | 219 / 1926   | 4980 / 3276   |                |          |
| KG_IS12_                | 129 / 222      | 2337.5 / 588.5  | 438 / 265    | 27 / 93      | 27 / 144     | 35 / 155       | 74 / 179     | 3139 / 516    | 1816.5 / 461.5 |          |
| KG_IS13_                |                |                 |              |              |              |                |              |               |                |          |
| U (top / left)          | KG_IS1_        | KG_IS2_         | KG_IS3_      | KG_IS5_      | KG_IS6_      | KG_IS7_        | KG_IS10_     | KG_IS11_      | KG_IS12_       | KG_IS13_ |
| KG_IS1_                 | 602 / 294      |                 |              |              |              |                |              |               |                |          |
| KG_IS2_                 | 240 / 110      | 831.5 / 768.5   |              |              |              |                |              |               |                |          |
| KG_IS3_                 | 38 / 4         | 140.5 / 51.5    | 55 / 20      |              |              |                |              |               |                |          |
| KG_IS5_                 | 33 / 51        | 96 / 288        | 36 / 114     | 0 / 18       |              |                |              |               |                |          |
| KG_IS6_                 | 38.5 / 59.5    | 112 / 336       | 42 / 133     | 0 / 21       | 21 / 21      |                |              |               |                |          |
| KG_IS7_                 | 82 / 58        | 248 / 392       | 88 / 162     | 4 / 26       | 42 / 18      | 49 / 21        |              |               |                |          |
| KG_IS10_                | 864.5 / 157.5  | 3066.5 / 1605.5 | 1139 / 686   | 92 / 127     | 393 / 45     | 458.5 / 52.5   | 600 / 130    |               |                |          |
| KG_IS11_                | 575.5 / 194.5  | 2047 / 1473     | 760 / 615    | 58 / 107     | 267 / 63     | 311.5 / 73.5   | 386 / 164    | 1736 / 2279   |                |          |
| KG_IS12_                | 144 / 24       | 510.5 / 257.5   | 187 / 113    | 15 / 21      | 66 / 6       | 77 / 7         | 101 / 19     | 438 / 438     | 383.5 / 276.5  |          |
| KG_IS13_                |                |                 |              |              |              |                |              |               |                |          |
| z                       | KG_IS1_        | KG_IS2_         | KG_IS3_      | KG_IS5_      | KG_IS6_      | KG_IS7_        | KG_IS10_     | KG_IS11_      | KG_IS12_       | KG_IS13_ |
| KG_IS1_                 |                |                 |              |              |              |                |              |               |                |          |
| KG_IS2_                 | 2.01           |                 |              |              |              |                |              |               |                |          |
| KG_IS3_                 | 1.90           | 0.29            |              |              |              |                |              |               |                |          |
| KG_IS5_                 | 2.14           | 1.35            | 1.30         |              |              |                |              |               |                |          |
| KG_IS6_                 | 0.74           | 2.01            | 1.95         | 2.32         |              |                |              |               |                |          |
| KG_IS7_                 | 0.78           | 2.16            | 2.07         | 2.39         | 0.00         |                |              |               |                |          |
| KG_IS10_                | 0.70           | 1.14            | 1.35         | 1.86         | 1.30         | 1.37           |              |               |                |          |
| KG_IS11_                | 4.08           | 3.15            | 1.85         | 0.47         | 3.22         | 3.46           | 3.29         |               |                |          |
| KG_IS12_                | 2.84           | 1.53            | 0.75         | 0.86         | 2.47         | 2.65           | 2.02         | 1.31          |                |          |
| KG_IS13_                | 3.09           | 1.80            | 1.20         | 0.43         | 2.81         | 2.96           | 2.70         | 0.00          | 0.87           |          |
| ES                      | KG_IS1_        | KG_IS2_         | KG_IS3_      | KG_IS5_      | KG_IS6_      | KG_IS7_        | KG_IS10_     | KG_IS11_      | KG_IS12_       | KG_IS13_ |
| KG_IS1_                 | 0.03           |                 |              |              |              |                |              |               |                |          |
| KG_IS2_                 | 0.05           | 0.00            |              |              |              |                |              |               |                |          |
| KG_IS3_                 | 0.13           | 0.02            | 0.05         |              |              |                |              |               |                |          |
| KG_IS5_                 | 0.04           | 0.03            | 0.06         | 0.26         |              |                |              |               |                |          |
| KG_IS6_                 | 0.04           | 0.03            | 0.06         | 0.24         | 0.00         |                |              |               |                |          |
| KG_IS7_                 | 0.03           | 0.02            | 0.04         | 0.14         | 0.08         | 0.08           |              |               |                |          |
| KG_IS10_                | 0.05           | 0.02            | 0.02         | 0.01         | 0.04         | 0.04           | 0.04         |               |                |          |
| KG_IS11_                | 0.04           | 0.01            | 0.01         | 0.01         | 0.04         | 0.04           | 0.03         | 0.01          |                |          |
| KG_IS12_                | 0.12           | 0.02            | 0.03         | 0.03         | 0.16         | 0.16           | 0.12         | 0.00          | 0.01           |          |
| KG_IS13_                |                |                 |              |              |              |                |              |               |                |          |
| Degree of Association   | KG_IS1_        | KG_IS2_         | KG_IS3_      | KG_IS5_      | KG_IS6_      | KG_IS7_        | KG_IS10_     | KG_IS11_      | KG_IS12_       | KG_IS13_ |
| KG_IS1_                 |                |                 |              |              |              |                |              |               |                |          |
| KG_IS2_                 | small          |                 |              |              |              |                |              |               |                |          |
| KG_IS3_                 | small          | small           |              |              |              |                |              |               |                |          |
| KG_IS5_                 | small-medium   | small           | small        |              |              |                |              |               |                |          |
| KG_IS6_                 | small          | small           | small        | medium       |              |                |              |               |                |          |
| KG_IS7_                 | small          | small           | small        | small-medium | small        |                |              |               |                |          |
| KG_IS10_                | small          | small           | small        | small-medium | small        | small          |              |               |                |          |
| KG_IS11_                | small          | small           | small        | small        | small        | small          | small        |               |                |          |
| KG_IS12_                | small          | small           | small        | small        | small        | small          | small        | small         |                |          |
| KG_IS13_                | small-medium   | small           | small        | small        | small-medium | small-medium   | small-medium | small         | small          |          |
| Significantly Different | KG_IS1_        | KG_IS2_         | KG_IS3_      | KG_IS5_      | KG_IS6_      | KG_IS7_        | KG_IS10_     | KG_IS11_      | KG_IS12_       | KG_IS13_ |
| KG_IS1_                 |                |                 |              |              |              |                |              |               |                |          |
| KG_IS2_                 | YES            |                 |              |              |              |                |              |               |                |          |
| KG_IS3_                 | NO             | NO              |              |              |              |                |              |               |                |          |
| KG_IS5_                 | YES            | NO              | NO           |              |              |                |              |               |                |          |
| KG_IS6_                 | NO             | YES             | NO           | YES          |              |                |              |               |                |          |
| KG_IS7_                 | NO             | YES             | YES          | YES          | NO           |                |              |               |                |          |
| KG_IS10_                | NO             | NO              | NO           | NO           | NO           | NO             |              |               |                |          |
| KG_IS11_                | YES            | YES             | NO           | NO           | YES          | YES            | YES          |               |                |          |
| KG_IS12_                | YES            | NO              | NO           | NO           | YES          | YES            | YES          | NO            |                |          |
| KG_IS13_                | YES            | NO              | NO           | NO           | YES          | YES            | YES          | NO            | NO             |          |

# Kougarak Intensive Station Mann Whitney U-Test Results

## Oxalate

| n= (top / left / total) | KG_IS1_      | KG_IS2_         | KG_IS3_      | KG_IS5_       | KG_IS6_        | KG_IS7_        | KG_IS10_       | KG_IS11_      | KG_IS12_     | KG_IS13_ |
|-------------------------|--------------|-----------------|--------------|---------------|----------------|----------------|----------------|---------------|--------------|----------|
| KG_IS1_                 |              |                 |              |               |                |                |                |               |              |          |
| KG_IS2_                 | 14 / 64 / 78 |                 |              |               |                |                |                |               |              |          |
| KG_IS3_                 | 14 / 24 / 38 | 64 / 24 / 88    |              |               |                |                |                |               |              |          |
| KG_IS5_                 | 14 / 3 / 17  | 64 / 3 / 67     | 24 / 3 / 27  |               |                |                |                |               |              |          |
| KG_IS6_                 | 14 / 7 / 21  | 64 / 7 / 71     | 24 / 7 / 31  |               |                |                |                |               |              |          |
| KG_IS7_                 | 14 / 7 / 21  | 64 / 7 / 71     | 24 / 7 / 31  | 3 / 7 / 10    | 7 / 7 / 14     |                |                |               |              |          |
| KG_IS10_                | 14 / 10 / 24 | 64 / 10 / 74    | 24 / 10 / 34 | 3 / 10 / 13   | 7 / 10 / 17    | 7 / 10 / 17    |                |               |              |          |
| KG_IS11_                | 14 / 73 / 87 | 64 / 73 / 137   | 24 / 73 / 97 | 3 / 73 / 76   | 7 / 73 / 80    | 7 / 73 / 80    | 10 / 73 / 83   |               |              |          |
| KG_IS12_                | 14 / 55 / 69 | 64 / 55 / 119   | 24 / 55 / 79 | 3 / 55 / 58   | 7 / 55 / 62    | 7 / 55 / 62    | 10 / 55 / 65   | 73 / 55 / 128 |              |          |
| KG_IS13_                | 14 / 12 / 26 | 64 / 12 / 76    | 24 / 12 / 36 | 3 / 12 / 15   | 7 / 12 / 19    | 7 / 12 / 19    | 10 / 12 / 22   | 73 / 12 / 85  | 55 / 12 / 67 |          |
| Σ[Rank] (top / left)    | KG_IS1_      | KG_IS2_         | KG_IS3_      | KG_IS5_       | KG_IS6_        | KG_IS7_        | KG_IS10_       | KG_IS11_      | KG_IS12_     | KG_IS13_ |
| KG_IS1_                 |              |                 |              |               |                |                |                |               |              |          |
| KG_IS2_                 | 803 / 2278   |                 |              |               |                |                |                |               |              |          |
| KG_IS3_                 | 263 / 478    | 2413.5 / 1502.5 |              |               |                |                |                |               |              |          |
| KG_IS5_                 | 144 / 9      | 2263 / 15       | 369 / 9      |               |                |                |                |               |              |          |
| KG_IS6_                 | 172 / 59     | 2323 / 233      | 417.5 / 78.5 | 10.5 / 44.5   |                |                |                |               |              |          |
| KG_IS7_                 | 152 / 79     | 2198 / 358      | 382 / 114    | 6 / 49        | 43 / 62        |                |                |               |              |          |
| KG_IS10_                | 199 / 101    | 2291 / 484      | 467 / 128    | 9 / 82        | 56 / 97        | 73 / 80        |                |               |              |          |
| KG_IS11_                | 479 / 3349   | 2571.5 / 6881.5 | 961 / 3792   | 10.5 / 2915.5 | 148.5 / 3091.5 | 243.5 / 2996.5 | 192.5 / 3293.5 |               |              |          |
| KG_IS12_                | 389 / 2026   | 2481.5 / 4658.5 | 801 / 2359   | 10.5 / 1700.5 | 121.5 / 1831.5 | 187 / 1766     | 161 / 1984     | 4694 / 3562   |              |          |
| KG_IS13_                | 176 / 175    | 2135 / 791      | 421 / 245    | 6 / 114       | 46 / 144       | 66 / 124       | 79 / 174       | 3218 / 437    | 1925 / 353   |          |
| U (top / left)          | KG_IS1_      | KG_IS2_         | KG_IS3_      | KG_IS5_       | KG_IS6_        | KG_IS7_        | KG_IS10_       | KG_IS11_      | KG_IS12_     | KG_IS13_ |
| KG_IS1_                 |              |                 |              |               |                |                |                |               |              |          |
| KG_IS2_                 | 198 / 698    |                 |              |               |                |                |                |               |              |          |
| KG_IS3_                 | 178 / 158    | 1202.5 / 333.5  |              |               |                |                |                |               |              |          |
| KG_IS5_                 | 3 / 39       | 9 / 183         | 3 / 69       |               |                |                |                |               |              |          |
| KG_IS6_                 | 31 / 67      | 205 / 243       | 50.5 / 117.5 | 16.5 / 4.5    |                |                |                |               |              |          |
| KG_IS7_                 | 51 / 47      | 330 / 118       | 86 / 82      | 21 / 0        | 34 / 15        |                |                |               |              |          |
| KG_IS10_                | 46 / 94      | 429 / 211       | 73 / 167     | 27 / 3        | 42 / 28        | 25 / 45        |                |               |              |          |
| KG_IS11_                | 648 / 374    | 4180.5 / 491.5  | 1091 / 661   | 214.5 / 4.5   | 390.5 / 120.5  | 295.5 / 215.5  | 592.5 / 137.5  |               |              |          |
| KG_IS12_                | 486 / 284    | 3118.5 / 401.5  | 819 / 501    | 160.5 / 4.5   | 291.5 / 93.5   | 226 / 159      | 444 / 106      | 2022 / 1993   |              |          |
| KG_IS13_                | 97 / 71      | 713 / 55        | 167 / 121    | 36 / 0        | 66 / 18        | 46 / 38        | 96 / 24        | 359 / 517     | 275 / 385    |          |
| z                       | KG_IS1_      | KG_IS2_         | KG_IS3_      | KG_IS5_       | KG_IS6_        | KG_IS7_        | KG_IS10_       | KG_IS11_      | KG_IS12_     | KG_IS13_ |
| KG_IS1_                 |              |                 |              |               |                |                |                |               |              |          |
| KG_IS2_                 | 3.26         |                 |              |               |                |                |                |               |              |          |
| KG_IS3_                 | 0.30         | 4.07            |              |               |                |                |                |               |              |          |
| KG_IS5_                 | 2.27         | 2.64            | 2.55         |               |                |                |                |               |              |          |
| KG_IS6_                 | 1.34         | 0.37            | 1.58         | 1.37          |                |                |                |               |              |          |
| KG_IS7_                 | 0.15         | 2.04            | 0.09         | 2.39          | 1.21           |                |                |               |              |          |
| KG_IS10_                | 1.41         | 1.72            | 1.78         | 2.03          | 0.68           | 0.98           |                |               |              |          |
| KG_IS11_                | 1.58         | 7.96            | 1.80         | 2.80          | 2.30           | 0.68           | 3.18           |               |              |          |
| KG_IS12_                | 1.51         | 7.24            | 1.69         | 2.74          | 2.20           | 0.75           | 3.07           | 0.07          |              |          |
| KG_IS13_                | 0.67         | 4.69            | 0.77         | 2.60          | 2.03           | 0.34           | 2.37           | 1.00          | 0.90         |          |
| ES                      | KG_IS1_      | KG_IS2_         | KG_IS3_      | KG_IS5_       | KG_IS6_        | KG_IS7_        | KG_IS10_       | KG_IS11_      | KG_IS12_     | KG_IS13_ |
| KG_IS1_                 |              |                 |              |               |                |                |                |               |              |          |
| KG_IS2_                 | 0.04         |                 |              |               |                |                |                |               |              |          |
| KG_IS3_                 | 0.01         | 0.05            |              |               |                |                |                |               |              |          |
| KG_IS5_                 | 0.13         | 0.04            | 0.09         |               |                |                |                |               |              |          |
| KG_IS6_                 | 0.06         | 0.01            | 0.05         | 0.14          |                |                |                |               |              |          |
| KG_IS7_                 | 0.01         | 0.03            | 0.00         | 0.24          | 0.09           |                |                |               |              |          |
| KG_IS10_                | 0.06         | 0.02            | 0.05         | 0.16          | 0.04           | 0.06           |                |               |              |          |
| KG_IS11_                | 0.02         | 0.06            | 0.02         | 0.04          | 0.03           | 0.01           | 0.04           |               |              |          |
| KG_IS12_                | 0.02         | 0.06            | 0.02         | 0.05          | 0.04           | 0.01           | 0.05           | 0.00          |              |          |
| KG_IS13_                | 0.03         | 0.06            | 0.02         | 0.17          | 0.11           | 0.02           | 0.11           | 0.01          | 0.01         |          |
| Degree of Association   | KG_IS1_      | KG_IS2_         | KG_IS3_      | KG_IS5_       | KG_IS6_        | KG_IS7_        | KG_IS10_       | KG_IS11_      | KG_IS12_     | KG_IS13_ |
| KG_IS1_                 |              |                 |              |               |                |                |                |               |              |          |
| KG_IS2_                 | small        |                 |              |               |                |                |                |               |              |          |
| KG_IS3_                 | small        | small           |              |               |                |                |                |               |              |          |
| KG_IS5_                 | small-medium | small           | small        |               |                |                |                |               |              |          |
| KG_IS6_                 | small        | small           | small        | small-medium  |                |                |                |               |              |          |
| KG_IS7_                 | small        | small           | small        | small-medium  | small          |                |                |               |              |          |
| KG_IS10_                | small        | small           | small        | small-medium  | small          | small          |                |               |              |          |
| KG_IS11_                | small        | small           | small        | small         | small          | small          | small          |               |              |          |
| KG_IS12_                | small        | small           | small        | small         | small          | small          | small          | small         |              |          |
| KG_IS13_                | small        | small           | small        | small-medium  | small-medium   | small          | small-medium   | small         | small        |          |
| Significantly Different | KG_IS1_      | KG_IS2_         | KG_IS3_      | KG_IS5_       | KG_IS6_        | KG_IS7_        | KG_IS10_       | KG_IS11_      | KG_IS12_     | KG_IS13_ |
| KG_IS1_                 |              |                 |              |               |                |                |                |               |              |          |
| KG_IS2_                 | YES          |                 |              |               |                |                |                |               |              |          |
| KG_IS3_                 | NO           | YES             |              |               |                |                |                |               |              |          |
| KG_IS5_                 | YES          | YES             | YES          |               |                |                |                |               |              |          |
| KG_IS6_                 | NO           | NO              | NO           | NO            |                |                |                |               |              |          |
| KG_IS7_                 | NO           | YES             | NO           | YES           | NO             |                |                |               |              |          |
| KG_IS10_                | NO           | NO              | NO           | YES           | NO             | NO             |                |               |              |          |
| KG_IS11_                | NO           | YES             | NO           | YES           | YES            | NO             |                |               |              |          |
| KG_IS12_                | NO           | YES             | NO           | YES           | YES            | NO             | YES            | NO            |              |          |
| KG_IS13_                | NO           | YES             | NO           | YES           | YES            | NO             | YES            | NO            | NO           |          |



# Kougarok Intensive Station Mann Whitney U-Test Results

## Potassium

| n= (top / left / total) | KG_IS1_      | KG_IS2_       | KG_IS3_      | KG_IS5_      | KG_IS6_      | KG_IS7_      | KG_IS10_     | KG_IS11_      | KG_IS12_     | KG_IS13_ |
|-------------------------|--------------|---------------|--------------|--------------|--------------|--------------|--------------|---------------|--------------|----------|
| KG_IS1_                 |              |               |              |              |              |              |              |               |              |          |
| KG_IS2_                 | 17 / 64 / 81 |               |              |              |              |              |              |               |              |          |
| KG_IS3_                 | 17 / 25 / 42 | 64 / 25 / 89  |              |              |              |              |              |               |              |          |
| KG_IS5_                 | 17 / 3 / 20  | 64 / 3 / 67   | 25 / 3 / 28  |              |              |              |              |               |              |          |
| KG_IS6_                 | 17 / 7 / 24  | 64 / 7 / 71   | 25 / 7 / 32  |              |              |              |              |               |              |          |
| KG_IS7_                 | 17 / 7 / 24  | 64 / 7 / 71   | 25 / 7 / 32  | 3 / 7 / 10   | 7 / 7 / 14   |              |              |               |              |          |
| KG_IS10_                | 17 / 10 / 27 | 64 / 10 / 74  | 25 / 10 / 35 | 3 / 10 / 13  | 7 / 10 / 17  | 7 / 10 / 17  |              |               |              |          |
| KG_IS11_                | 17 / 73 / 90 | 64 / 73 / 137 | 25 / 73 / 98 | 3 / 73 / 76  | 7 / 73 / 80  | 7 / 73 / 80  | 10 / 73 / 83 |               |              |          |
| KG_IS12_                | 17 / 54 / 71 | 64 / 54 / 118 | 25 / 54 / 79 | 3 / 54 / 57  | 7 / 54 / 61  | 7 / 54 / 61  | 10 / 54 / 64 | 73 / 54 / 127 |              |          |
| KG_IS13_                | 17 / 12 / 29 | 64 / 12 / 76  | 25 / 12 / 37 | 3 / 12 / 15  | 7 / 12 / 19  | 7 / 12 / 19  | 10 / 12 / 22 | 73 / 12 / 85  | 54 / 12 / 66 |          |
| Σ[Rank] (top / left)    | KG_IS1_      | KG_IS2_       | KG_IS3_      | KG_IS5_      | KG_IS6_      | KG_IS7_      | KG_IS10_     | KG_IS11_      | KG_IS12_     | KG_IS13_ |
| KG_IS1_                 |              |               |              |              |              |              |              |               |              |          |
| KG_IS2_                 | 498 / 2823   |               |              |              |              |              |              |               |              |          |
| KG_IS3_                 | 370 / 533    | 3220 / 785    |              |              |              |              |              |               |              |          |
| KG_IS5_                 | 195 / 15     | 2263 / 15     | 385 / 21     |              |              |              |              |               |              |          |
| KG_IS6_                 | 241 / 59     | 2465 / 91     | 449 / 79     | 15 / 40      |              |              |              |               |              |          |
| KG_IS7_                 | 241 / 59     | 2482 / 74     | 450 / 78     | 15 / 40      | 53 / 52      |              |              |               |              |          |
| KG_IS10_                | 201 / 177    | 2466 / 309    | 405 / 225    | 6 / 85       | 36 / 117     | 36 / 117     |              |               |              |          |
| KG_IS11_                | 645 / 3450   | 5349 / 4104   | 1041 / 3810  | 6 / 2920     | 91 / 3149    | 91 / 3149    | 516 / 2970   |               |              |          |
| KG_IS12_                | 540 / 2016   | 4584 / 2437   | 885 / 2275   | 15 / 1638    | 95 / 1796    | 94 / 1797    | 396 / 1684   | 4723 / 3405   |              |          |
| KG_IS13_                | 267 / 168    | 2747 / 179    | 488 / 215    | 7.5 / 112.5  | 43 / 147     | 43 / 147     | 162 / 91     | 3359 / 296    | 1951 / 260   |          |
| U (top / left)          | KG_IS1_      | KG_IS2_       | KG_IS3_      | KG_IS5_      | KG_IS6_      | KG_IS7_      | KG_IS10_     | KG_IS11_      | KG_IS12_     | KG_IS13_ |
| KG_IS1_                 |              |               |              |              |              |              |              |               |              |          |
| KG_IS2_                 | 743 / 345    |               |              |              |              |              |              |               |              |          |
| KG_IS3_                 | 208 / 217    | 460 / 1140    |              |              |              |              |              |               |              |          |
| KG_IS5_                 | 9 / 42       | 9 / 183       | 15 / 60      |              |              |              |              |               |              |          |
| KG_IS6_                 | 31 / 88      | 63 / 385      | 51 / 124     | 12 / 9       |              |              |              |               |              |          |
| KG_IS7_                 | 31 / 88      | 46 / 402      | 50 / 125     | 12 / 9       | 24 / 25      |              |              |               |              |          |
| KG_IS10_                | 122 / 48     | 254 / 386     | 170 / 80     | 30 / 0       | 62 / 8       | 62 / 8       |              |               |              |          |
| KG_IS11_                | 749 / 492    | 1403 / 3269   | 1109 / 716   | 219 / 0      | 448 / 63     | 448 / 63     | 269 / 461    |               |              |          |
| KG_IS12_                | 531 / 387    | 952 / 2504    | 790 / 560    | 153 / 9      | 311 / 67     | 312 / 66     | 199 / 341    | 1920 / 2022   |              |          |
| KG_IS13_                | 90 / 114     | 101 / 667     | 137 / 163    | 34.5 / 1.5   | 69 / 15      | 69 / 15      | 13 / 107     | 218 / 658     | 182 / 466    |          |
| z                       | KG_IS1_      | KG_IS2_       | KG_IS3_      | KG_IS5_      | KG_IS6_      | KG_IS7_      | KG_IS10_     | KG_IS11_      | KG_IS12_     | KG_IS13_ |
| KG_IS1_                 |              |               |              |              |              |              |              |               |              |          |
| KG_IS2_                 | 2.31         |               |              |              |              |              |              |               |              |          |
| KG_IS3_                 | 0.12         | 3.10          |              |              |              |              |              |               |              |          |
| KG_IS5_                 | 1.75         | 2.64          | 1.67         |              |              |              |              |               |              |          |
| KG_IS6_                 | 1.81         | 3.11          | 1.66         | 0.34         |              |              |              |               |              |          |
| KG_IS7_                 | 1.81         | 3.43          | 1.71         | 0.34         | 0.06         |              |              |               |              |          |
| KG_IS10_                | 1.86         | 1.04          | 1.64         | 2.54         | 2.63         | 2.63         |              |               |              |          |
| KG_IS11_                | 1.32         | 4.03          | 1.60         | 2.92         | 3.28         | 3.28         | 1.34         |               |              |          |
| KG_IS12_                | 0.97         | 4.19          | 1.21         | 2.57         | 2.76         | 2.78         | 1.31         | 0.25          |              |          |
| KG_IS13_                | 0.53         | 4.03          | 0.42         | 2.38         | 2.28         | 2.28         | 3.10         | 2.78          | 2.36         |          |
| ES                      | KG_IS1_      | KG_IS2_       | KG_IS3_      | KG_IS5_      | KG_IS6_      | KG_IS7_      | KG_IS10_     | KG_IS11_      | KG_IS12_     | KG_IS13_ |
| KG_IS1_                 |              |               |              |              |              |              |              |               |              |          |
| KG_IS2_                 | 0.03         |               |              |              |              |              |              |               |              |          |
| KG_IS3_                 | 0.00         | 0.03          |              |              |              |              |              |               |              |          |
| KG_IS5_                 | 0.09         | 0.04          | 0.06         |              |              |              |              |               |              |          |
| KG_IS6_                 | 0.08         | 0.04          | 0.05         | 0.03         |              |              |              |               |              |          |
| KG_IS7_                 | 0.08         | 0.05          | 0.05         | 0.03         | 0.00         |              |              |               |              |          |
| KG_IS10_                | 0.07         | 0.01          | 0.05         | 0.20         | 0.15         | 0.15         |              |               |              |          |
| KG_IS11_                | 0.01         | 0.03          | 0.02         | 0.04         | 0.04         | 0.04         | 0.02         |               |              |          |
| KG_IS12_                | 0.01         | 0.04          | 0.02         | 0.05         | 0.05         | 0.05         | 0.02         | 0.00          |              |          |
| KG_IS13_                | 0.02         | 0.05          | 0.01         | 0.16         | 0.12         | 0.12         | 0.14         | 0.03          | 0.04         |          |
| Degree of Association   | KG_IS1_      | KG_IS2_       | KG_IS3_      | KG_IS5_      | KG_IS6_      | KG_IS7_      | KG_IS10_     | KG_IS11_      | KG_IS12_     | KG_IS13_ |
| KG_IS1_                 |              |               |              |              |              |              |              |               |              |          |
| KG_IS2_                 | small        |               |              |              |              |              |              |               |              |          |
| KG_IS3_                 | small        | small         |              |              |              |              |              |               |              |          |
| KG_IS5_                 | small        | small         | small        |              |              |              |              |               |              |          |
| KG_IS6_                 | small        | small         | small        | small        |              |              |              |               |              |          |
| KG_IS7_                 | small        | small         | small        | small        | small        |              |              |               |              |          |
| KG_IS10_                | small        | small         | small        | small-medium | small-medium | small-medium |              |               |              |          |
| KG_IS11_                | small        | small         | small        | small        | small        | small        | small        |               |              |          |
| KG_IS12_                | small        | small         | small        | small        | small        | small        | small        | small         |              |          |
| KG_IS13_                | small        | small         | small        | small-medium | small-medium | small-medium | small-medium | small         | small        |          |
| Significantly Different | KG_IS1_      | KG_IS2_       | KG_IS3_      | KG_IS5_      | KG_IS6_      | KG_IS7_      | KG_IS10_     | KG_IS11_      | KG_IS12_     | KG_IS13_ |
| KG_IS1_                 |              |               |              |              |              |              |              |               |              |          |
| KG_IS2_                 | YES          |               |              |              |              |              |              |               |              |          |
| KG_IS3_                 | NO           | YES           |              |              |              |              |              |               |              |          |
| KG_IS5_                 | NO           | YES           | NO           |              |              |              |              |               |              |          |
| KG_IS6_                 | NO           | YES           | NO           | NO           |              |              |              |               |              |          |
| KG_IS7_                 | NO           | YES           | NO           | NO           | NO           |              |              |               |              |          |
| KG_IS10_                | NO           | NO            | NO           | YES          | YES          | YES          |              |               |              |          |
| KG_IS11_                | NO           | YES           | NO           | YES          | YES          | YES          | NO           |               |              |          |
| KG_IS12_                | NO           | YES           | NO           | YES          | YES          | YES          | NO           | NO            |              |          |
| KG_IS13_                | NO           | YES           | NO           | YES          | YES          | YES          | YES          | YES           | YES          |          |

# Kougarok Intensive Station Mann Whitney U-Test Results

## Silica

| n= (top / left / total) | KG_IS1_      | KG_IS2_       | KG_IS3_      | KG_IS5_      | KG_IS6_      | KG_IS7_      | KG_IS10_     | KG_IS11_      | KG_IS12_     | KG_IS13_ |
|-------------------------|--------------|---------------|--------------|--------------|--------------|--------------|--------------|---------------|--------------|----------|
| KG_IS1_                 |              |               |              |              |              |              |              |               |              |          |
| KG_IS2_                 | 17 / 64 / 81 |               |              |              |              |              |              |               |              |          |
| KG_IS3_                 | 17 / 25 / 42 | 64 / 25 / 89  |              |              |              |              |              |               |              |          |
| KG_IS5_                 | 17 / 3 / 20  | 64 / 3 / 67   | 25 / 3 / 28  |              |              |              |              |               |              |          |
| KG_IS6_                 | 17 / 7 / 24  | 64 / 7 / 71   | 25 / 7 / 32  |              |              |              |              |               |              |          |
| KG_IS7_                 | 17 / 7 / 24  | 64 / 7 / 71   | 25 / 7 / 32  | 3 / 7 / 10   | 7 / 7 / 14   |              |              |               |              |          |
| KG_IS10_                | 17 / 10 / 27 | 64 / 10 / 74  | 25 / 10 / 35 | 3 / 10 / 13  | 7 / 10 / 17  | 7 / 10 / 17  |              |               |              |          |
| KG_IS11_                | 17 / 73 / 90 | 64 / 73 / 137 | 25 / 73 / 98 | 3 / 73 / 76  | 7 / 73 / 80  | 7 / 73 / 80  | 10 / 73 / 83 |               |              |          |
| KG_IS12_                | 17 / 54 / 71 | 64 / 54 / 118 | 25 / 54 / 79 | 3 / 54 / 57  | 7 / 54 / 61  | 7 / 54 / 61  | 10 / 54 / 64 | 73 / 54 / 127 |              |          |
| KG_IS13_                | 17 / 12 / 29 | 64 / 12 / 76  | 25 / 12 / 37 | 3 / 12 / 15  | 7 / 12 / 19  | 7 / 12 / 19  | 10 / 12 / 22 | 73 / 12 / 85  | 54 / 12 / 66 |          |
| Σ[Rank] (top / left)    | KG_IS1_      | KG_IS2_       | KG_IS3_      | KG_IS5_      | KG_IS6_      | KG_IS7_      | KG_IS10_     | KG_IS11_      | KG_IS12_     | KG_IS13_ |
| KG_IS1_                 |              |               |              |              |              |              |              |               |              |          |
| KG_IS2_                 | 821 / 2500   |               |              |              |              |              |              |               |              |          |
| KG_IS3_                 | 439 / 464    | 3319 / 686    |              |              |              |              |              |               |              |          |
| KG_IS5_                 | 195 / 15     | 2266 / 12     | 394 / 12     |              |              |              |              |               |              |          |
| KG_IS6_                 | 248 / 52     | 2495 / 61     | 471 / 57     | 15 / 40      |              |              |              |               |              |          |
| KG_IS7_                 | 248 / 52     | 2487 / 69     | 468 / 60     | 15 / 40      | 52 / 53      |              |              |               |              |          |
| KG_IS10_                | 229 / 149    | 2207 / 568    | 339 / 291    | 6 / 85       | 29 / 124     | 29 / 124     |              |               |              |          |
| KG_IS11_                | 926 / 3169   | 5030 / 4423   | 1011 / 3840  | 6 / 2920     | 68 / 3172    | 70 / 3170    | 689 / 2797   |               |              |          |
| KG_IS12_                | 662 / 1894   | 4066 / 2955   | 796 / 2364   | 6 / 1647     | 55 / 1836    | 58 / 1833    | 480 / 1600   | 4456 / 3672   |              |          |
| KG_IS13_                | 285 / 150    | 2647 / 279    | 456 / 247    | 6 / 114      | 34 / 156     | 39 / 151     | 168 / 85     | 3216 / 439    | 1889 / 322   |          |
| U (top / left)          | KG_IS1_      | KG_IS2_       | KG_IS3_      | KG_IS5_      | KG_IS6_      | KG_IS7_      | KG_IS10_     | KG_IS11_      | KG_IS12_     | KG_IS13_ |
| KG_IS1_                 |              |               |              |              |              |              |              |               |              |          |
| KG_IS2_                 | 420 / 668    |               |              |              |              |              |              |               |              |          |
| KG_IS3_                 | 139 / 286    | 361 / 1239    |              |              |              |              |              |               |              |          |
| KG_IS5_                 | 9 / 42       | 6 / 186       | 6 / 69       |              |              |              |              |               |              |          |
| KG_IS6_                 | 24 / 95      | 33 / 415      | 29 / 146     | 12 / 9       |              |              |              |               |              |          |
| KG_IS7_                 | 24 / 95      | 41 / 407      | 32 / 143     | 12 / 9       | 25 / 24      |              |              |               |              |          |
| KG_IS10_                | 94 / 76      | 513 / 127     | 236 / 14     | 30 / 0       | 69 / 1       | 69 / 1       |              |               |              |          |
| KG_IS11_                | 468 / 773    | 1722 / 2950   | 1139 / 686   | 219 / 0      | 471 / 40     | 469 / 42     | 96 / 634     |               |              |          |
| KG_IS12_                | 409 / 509    | 1470 / 1986   | 879 / 471    | 162 / 0      | 351 / 27     | 348 / 30     | 115 / 425    | 2187 / 1755   |              |          |
| KG_IS13_                | 72 / 132     | 201 / 567     | 169 / 131    | 36 / 0       | 78 / 6       | 73 / 11      | 7 / 113      | 361 / 515     | 244 / 404    |          |
| z                       | KG_IS1_      | KG_IS2_       | KG_IS3_      | KG_IS5_      | KG_IS6_      | KG_IS7_      | KG_IS10_     | KG_IS11_      | KG_IS12_     | KG_IS13_ |
| KG_IS1_                 |              |               |              |              |              |              |              |               |              |          |
| KG_IS2_                 | 1.44         |               |              |              |              |              |              |               |              |          |
| KG_IS3_                 | 1.88         | 4.01          |              |              |              |              |              |               |              |          |
| KG_IS5_                 | 1.75         | 2.73          | 2.34         |              |              |              |              |               |              |          |
| KG_IS6_                 | 2.25         | 3.68          | 2.67         | 0.34         |              |              |              |               |              |          |
| KG_IS7_                 | 2.25         | 3.53          | 2.53         | 0.34         | 0.06         |              |              |               |              |          |
| KG_IS10_                | 0.45         | 3.05          | 4.05         | 2.54         | 3.32         | 3.32         |              |               |              |          |
| KG_IS11_                | 1.57         | 2.65          | 1.85         | 2.92         | 3.67         | 3.64         | 3.76         |               |              |          |
| KG_IS12_                | 0.67         | 1.39          | 2.15         | 2.89         | 3.67         | 3.60         | 2.87         | 1.05          |              |          |
| KG_IS13_                | 1.33         | 2.61          | 0.62         | 2.60         | 3.04         | 2.62         | 3.49         | 0.97          | 1.33         |          |
| ES                      | KG_IS1_      | KG_IS2_       | KG_IS3_      | KG_IS5_      | KG_IS6_      | KG_IS7_      | KG_IS10_     | KG_IS11_      | KG_IS12_     | KG_IS13_ |
| KG_IS1_                 |              |               |              |              |              |              |              |               |              |          |
| KG_IS2_                 | 0.02         |               |              |              |              |              |              |               |              |          |
| KG_IS3_                 | 0.04         | 0.05          |              |              |              |              |              |               |              |          |
| KG_IS5_                 | 0.09         | 0.04          | 0.08         |              |              |              |              |               |              |          |
| KG_IS6_                 | 0.09         | 0.05          | 0.08         | 0.03         |              |              |              |               |              |          |
| KG_IS7_                 | 0.09         | 0.05          | 0.08         | 0.03         | 0.00         |              |              |               |              |          |
| KG_IS10_                | 0.02         | 0.04          | 0.12         | 0.20         | 0.20         | 0.20         |              |               |              |          |
| KG_IS11_                | 0.02         | 0.02          | 0.02         | 0.04         | 0.05         | 0.05         | 0.05         |               |              |          |
| KG_IS12_                | 0.01         | 0.01          | 0.03         | 0.05         | 0.06         | 0.06         | 0.04         | 0.01          |              |          |
| KG_IS13_                | 0.05         | 0.03          | 0.02         | 0.17         | 0.16         | 0.14         | 0.16         | 0.01          | 0.02         |          |
| Degree of Association   | KG_IS1_      | KG_IS2_       | KG_IS3_      | KG_IS5_      | KG_IS6_      | KG_IS7_      | KG_IS10_     | KG_IS11_      | KG_IS12_     | KG_IS13_ |
| KG_IS1_                 |              |               |              |              |              |              |              |               |              |          |
| KG_IS2_                 | small        |               |              |              |              |              |              |               |              |          |
| KG_IS3_                 | small        | small         |              |              |              |              |              |               |              |          |
| KG_IS5_                 | small        | small         | small        |              |              |              |              |               |              |          |
| KG_IS6_                 | small        | small         | small        | small        |              |              |              |               |              |          |
| KG_IS7_                 | small        | small         | small        | small        | small        |              |              |               |              |          |
| KG_IS10_                | small        | small         | small-medium | small-medium | small-medium | small-medium |              |               |              |          |
| KG_IS11_                | small        | small         | small        | small        | small        | small        | small        |               |              |          |
| KG_IS12_                | small        | small         | small        | small        | small        | small        | small        | small         |              |          |
| KG_IS13_                | small        | small         | small        | small-medium | small-medium | small-medium | small-medium | small         | small        |          |
| Significantly Different | KG_IS1_      | KG_IS2_       | KG_IS3_      | KG_IS5_      | KG_IS6_      | KG_IS7_      | KG_IS10_     | KG_IS11_      | KG_IS12_     | KG_IS13_ |
| KG_IS1_                 |              |               |              |              |              |              |              |               |              |          |
| KG_IS2_                 | NO           |               |              |              |              |              |              |               |              |          |
| KG_IS3_                 | NO           | YES           |              |              |              |              |              |               |              |          |
| KG_IS5_                 | NO           | YES           | YES          |              |              |              |              |               |              |          |
| KG_IS6_                 | YES          | YES           | YES          | NO           |              |              |              |               |              |          |
| KG_IS7_                 | YES          | YES           | YES          | NO           | NO           |              |              |               |              |          |
| KG_IS10_                | NO           | YES           | YES          | YES          | YES          | YES          |              |               |              |          |
| KG_IS11_                | NO           | YES           | NO           | YES          | YES          | YES          | YES          |               |              |          |
| KG_IS12_                | NO           | NO            | YES          | YES          | YES          | YES          | YES          | NO            |              |          |
| KG_IS13_                | NO           | YES           | NO           | YES          | YES          | YES          | YES          | NO            | NO           |          |



# Kougarok Intensive Station Mann Whitney U-Test Results

## Strontium

| n= (top / left / total) | KG_IS1_      | KG_IS2_       | KG_IS3_       | KG_IS5_      | KG_IS6_      | KG_IS7_     | KG_IS10_     | KG_IS11_      | KG_IS12_     | KG_IS13_ |
|-------------------------|--------------|---------------|---------------|--------------|--------------|-------------|--------------|---------------|--------------|----------|
| KG_IS1_                 |              |               |               |              |              |             |              |               |              |          |
| KG_IS2_                 | 17 / 64 / 81 |               |               |              |              |             |              |               |              |          |
| KG_IS3_                 | 17 / 25 / 42 | 64 / 25 / 89  |               |              |              |             |              |               |              |          |
| KG_IS5_                 | 17 / 3 / 20  | 64 / 3 / 67   | 25 / 3 / 28   |              |              |             |              |               |              |          |
| KG_IS6_                 | 17 / 7 / 24  | 64 / 7 / 71   | 25 / 7 / 32   |              |              |             |              |               |              |          |
| KG_IS7_                 | 17 / 7 / 24  | 64 / 7 / 71   | 25 / 7 / 32   | 3 / 7 / 10   | 7 / 7 / 14   |             |              |               |              |          |
| KG_IS10_                | 17 / 10 / 27 | 64 / 10 / 74  | 25 / 10 / 35  | 3 / 10 / 13  | 7 / 10 / 17  | 7 / 10 / 17 |              |               |              |          |
| KG_IS11_                | 17 / 73 / 90 | 64 / 73 / 137 | 25 / 73 / 98  | 3 / 73 / 76  | 7 / 73 / 80  | 7 / 73 / 80 | 10 / 73 / 83 |               |              |          |
| KG_IS12_                | 17 / 54 / 71 | 64 / 54 / 118 | 25 / 54 / 79  | 3 / 54 / 57  | 7 / 54 / 61  | 7 / 54 / 61 | 10 / 54 / 64 | 73 / 54 / 127 |              |          |
| KG_IS13_                | 17 / 12 / 29 | 64 / 12 / 76  | 25 / 12 / 37  | 3 / 12 / 15  | 7 / 12 / 19  | 7 / 12 / 19 | 10 / 12 / 22 | 73 / 12 / 85  | 54 / 12 / 66 |          |
| Σ[Rank] (top / left)    | KG_IS1_      | KG_IS2_       | KG_IS3_       | KG_IS5_      | KG_IS6_      | KG_IS7_     | KG_IS10_     | KG_IS11_      | KG_IS12_     | KG_IS13_ |
| KG_IS1_                 |              |               |               |              |              |             |              |               |              |          |
| KG_IS2_                 | 484 / 2837   |               |               |              |              |             |              |               |              |          |
| KG_IS3_                 | 442 / 461    | 3519 / 486    |               |              |              |             |              |               |              |          |
| KG_IS5_                 | 182 / 28     | 2259 / 19     | 356 / 50      |              |              |             |              |               |              |          |
| KG_IS6_                 | 234 / 66     | 2450 / 106    | 418 / 110     | 21 / 34      |              |             |              |               |              |          |
| KG_IS7_                 | 233 / 67     | 2395 / 161    | 412.5 / 115.5 | 21 / 34      | 58 / 47      |             |              |               |              |          |
| KG_IS10_                | 217 / 161    | 2552 / 223    | 363 / 267     | 10 / 81      | 38 / 115     | 48 / 105    |              |               |              |          |
| KG_IS11_                | 711 / 3384   | 6120 / 3333   | 705 / 4146    | 61 / 2865    | 101 / 3139   | 174 / 3066  | 523 / 2963   |               |              |          |
| KG_IS12_                | 613 / 1943   | 4908 / 2113   | 730 / 2430    | 56 / 1597    | 108 / 1783   | 146 / 1745  | 428 / 1652   | 4990 / 3138   |              |          |
| KG_IS13_                | 270 / 165    | 2786 / 140    | 432 / 271     | 19 / 101     | 40 / 150     | 52 / 138    | 167 / 86     | 3451 / 204    | 1870 / 341   |          |
| U (top / left)          | KG_IS1_      | KG_IS2_       | KG_IS3_       | KG_IS5_      | KG_IS6_      | KG_IS7_     | KG_IS10_     | KG_IS11_      | KG_IS12_     | KG_IS13_ |
| KG_IS1_                 |              |               |               |              |              |             |              |               |              |          |
| KG_IS2_                 | 757 / 331    |               |               |              |              |             |              |               |              |          |
| KG_IS3_                 | 136 / 289    | 161 / 1439    |               |              |              |             |              |               |              |          |
| KG_IS5_                 | 22 / 29      | 13 / 179      | 44 / 31       |              |              |             |              |               |              |          |
| KG_IS6_                 | 38 / 81      | 78 / 370      | 82 / 93       | 6 / 15       |              |             |              |               |              |          |
| KG_IS7_                 | 39 / 80      | 133 / 315     | 87.5 / 87.5   | 6 / 15       | 19 / 30      |             |              |               |              |          |
| KG_IS10_                | 106 / 64     | 168 / 472     | 212 / 38      | 26 / 4       | 60 / 10      | 50 / 20     |              |               |              |          |
| KG_IS11_                | 683 / 558    | 632 / 4040    | 1445 / 380    | 164 / 55     | 438 / 73     | 365 / 146   | 262 / 468    |               |              |          |
| KG_IS12_                | 458 / 460    | 628 / 2828    | 945 / 405     | 112 / 50     | 298 / 80     | 260 / 118   | 167 / 373    | 1653 / 2289   |              |          |
| KG_IS13_                | 87 / 117     | 62 / 706      | 193 / 107     | 23 / 13      | 72 / 12      | 60 / 24     | 8 / 112      | 126 / 750     | 263 / 385    |          |
| z                       | KG_IS1_      | KG_IS2_       | KG_IS3_       | KG_IS5_      | KG_IS6_      | KG_IS7_     | KG_IS10_     | KG_IS11_      | KG_IS12_     | KG_IS13_ |
| KG_IS1_                 |              |               |               |              |              |             |              |               |              |          |
| KG_IS2_                 | 2.47         |               |               |              |              |             |              |               |              |          |
| KG_IS3_                 | 1.96         | 5.83          |               |              |              |             |              |               |              |          |
| KG_IS5_                 | 0.37         | 2.52          | 0.48          |              |              |             |              |               |              |          |
| KG_IS6_                 | 1.37         | 2.82          | 0.25          | 1.03         |              |             |              |               |              |          |
| KG_IS7_                 | 1.30         | 1.76          | 0.00          | 1.03         | 0.70         |             |              |               |              |          |
| KG_IS10_                | 1.05         | 2.40          | 3.18          | 1.86         | 2.44         | 1.46        |              |               |              |          |
| KG_IS11_                | 0.64         | 7.35          | 4.34          | 1.45         | 3.11         | 1.86        | 1.44         |               |              |          |
| KG_IS12_                | 0.01         | 5.94          | 2.85          | 1.11         | 2.47         | 1.61        | 1.90         | 1.55          |              |          |
| KG_IS13_                | 0.66         | 4.59          | 1.40          | 0.72         | 2.54         | 1.52        | 3.43         | 3.94          | 1.01         |          |
| ES                      | KG_IS1_      | KG_IS2_       | KG_IS3_       | KG_IS5_      | KG_IS6_      | KG_IS7_     | KG_IS10_     | KG_IS11_      | KG_IS12_     | KG_IS13_ |
| KG_IS1_                 |              |               |               |              |              |             |              |               |              |          |
| KG_IS2_                 | 0.03         |               |               |              |              |             |              |               |              |          |
| KG_IS3_                 | 0.05         | 0.07          |               |              |              |             |              |               |              |          |
| KG_IS5_                 | 0.02         | 0.04          | 0.02          |              |              |             |              |               |              |          |
| KG_IS6_                 | 0.06         | 0.04          | 0.01          | 0.10         |              |             |              |               |              |          |
| KG_IS7_                 | 0.05         | 0.02          | 0.00          | 0.10         | 0.05         |             |              |               |              |          |
| KG_IS10_                | 0.04         | 0.03          | 0.09          | 0.14         | 0.14         | 0.09        |              |               |              |          |
| KG_IS11_                | 0.01         | 0.05          | 0.04          | 0.02         | 0.04         | 0.02        | 0.02         |               |              |          |
| KG_IS12_                | 0.00         | 0.05          | 0.04          | 0.02         | 0.04         | 0.02        | 0.03         | 0.01          |              |          |
| KG_IS13_                | 0.02         | 0.06          | 0.04          | 0.05         | 0.13         | 0.08        | 0.16         | 0.05          | 0.02         |          |
| Degree of Association   | KG_IS1_      | KG_IS2_       | KG_IS3_       | KG_IS5_      | KG_IS6_      | KG_IS7_     | KG_IS10_     | KG_IS11_      | KG_IS12_     | KG_IS13_ |
| KG_IS1_                 |              |               |               |              |              |             |              |               |              |          |
| KG_IS2_                 | small        |               |               |              |              |             |              |               |              |          |
| KG_IS3_                 | small        | small         |               |              |              |             |              |               |              |          |
| KG_IS5_                 | small        | small         | small         |              |              |             |              |               |              |          |
| KG_IS6_                 | small        | small         | small         | small-medium |              |             |              |               |              |          |
| KG_IS7_                 | small        | small         | small         | small-medium | small        |             |              |               |              |          |
| KG_IS10_                | small        | small         | small         | small-medium | small-medium | small       |              |               |              |          |
| KG_IS11_                | small        | small         | small         | small        | small        | small       | small        |               |              |          |
| KG_IS12_                | small        | small         | small         | small        | small        | small       | small        | small         |              |          |
| KG_IS13_                | small        | small         | small         | small        | small-medium | small       | small-medium | small         | small        |          |
| Significantly Different | KG_IS1_      | KG_IS2_       | KG_IS3_       | KG_IS5_      | KG_IS6_      | KG_IS7_     | KG_IS10_     | KG_IS11_      | KG_IS12_     | KG_IS13_ |
| KG_IS1_                 |              |               |               |              |              |             |              |               |              |          |
| KG_IS2_                 | YES          |               |               |              |              |             |              |               |              |          |
| KG_IS3_                 | YES          | YES           |               |              |              |             |              |               |              |          |
| KG_IS5_                 | NO           | YES           | NO            |              |              |             |              |               |              |          |
| KG_IS6_                 | NO           | YES           | NO            | NO           |              |             |              |               |              |          |
| KG_IS7_                 | NO           | NO            | NO            | NO           | NO           |             |              |               |              |          |
| KG_IS10_                | NO           | YES           | YES           | NO           | YES          | NO          |              |               |              |          |
| KG_IS11_                | NO           | YES           | YES           | NO           | YES          | NO          | NO           |               |              |          |
| KG_IS12_                | NO           | YES           | YES           | NO           | YES          | NO          | NO           | NO            |              |          |
| KG_IS13_                | NO           | YES           | NO            | NO           | YES          | NO          | YES          | YES           | NO           |          |

# Kougarok Intensive Station Mann Whitney U-Test Results

## Sulfate

| n= (top / left / total) | KG_IS1_        | KG_IS2_         | KG_IS3_         | KG_IS5_      | KG_IS6_     | KG_IS7_        | KG_IS10_     | KG_IS11_       | KG_IS12_     | KG_IS13_ |
|-------------------------|----------------|-----------------|-----------------|--------------|-------------|----------------|--------------|----------------|--------------|----------|
| KG_IS1_                 | 14 / 64 / 78   |                 |                 |              |             |                |              |                |              |          |
| KG_IS2_                 | 14 / 25 / 39   | 64 / 25 / 89    |                 |              |             |                |              |                |              |          |
| KG_IS3_                 | 14 / 3 / 17    | 64 / 3 / 67     | 25 / 3 / 28     |              |             |                |              |                |              |          |
| KG_IS5_                 | 14 / 7 / 21    | 64 / 7 / 71     | 25 / 7 / 32     |              |             |                |              |                |              |          |
| KG_IS6_                 | 14 / 7 / 21    | 64 / 7 / 71     | 25 / 7 / 32     | 3 / 7 / 10   | 7 / 7 / 14  |                |              |                |              |          |
| KG_IS7_                 | 14 / 10 / 24   | 64 / 10 / 74    | 25 / 10 / 35    | 3 / 10 / 13  | 7 / 10 / 17 | 7 / 10 / 17    |              |                |              |          |
| KG_IS10_                | 14 / 73 / 87   | 64 / 73 / 137   | 25 / 73 / 98    | 3 / 73 / 76  | 7 / 73 / 80 | 7 / 73 / 80    | 10 / 73 / 83 |                |              |          |
| KG_IS11_                | 14 / 55 / 69   | 64 / 55 / 119   | 25 / 55 / 80    | 3 / 55 / 58  | 7 / 55 / 62 | 7 / 55 / 62    | 10 / 55 / 65 | 73 / 55 / 128  |              |          |
| KG_IS12_                | 14 / 12 / 26   | 64 / 12 / 76    | 25 / 12 / 37    | 3 / 12 / 15  | 7 / 12 / 19 | 7 / 12 / 19    | 10 / 12 / 22 | 73 / 12 / 85   | 55 / 12 / 67 |          |
| Σ[Rank] (top / left)    | KG_IS1_        | KG_IS2_         | KG_IS3_         | KG_IS5_      | KG_IS6_     | KG_IS7_        | KG_IS10_     | KG_IS11_       | KG_IS12_     | KG_IS13_ |
| KG_IS1_                 | 295.5 / 2785.5 |                 |                 |              |             |                |              |                |              |          |
| KG_IS2_                 | 250.5 / 529.5  | 3315.5 / 689.5  |                 |              |             |                |              |                |              |          |
| KG_IS3_                 | 106 / 47       | 2121 / 157      | 328 / 78        |              |             |                |              |                |              |          |
| KG_IS5_                 | 142.5 / 88.5   | 2389 / 167      | 407.5 / 120.5   | 25 / 30      |             |                |              |                |              |          |
| KG_IS6_                 | 140 / 91       | 2405 / 151      | 403 / 125       | 26 / 29      | 53 / 52     |                |              |                |              |          |
| KG_IS7_                 | 147 / 153      | 2459 / 316      | 425 / 205       | 33 / 58      | 56 / 97     | 60 / 93        |              |                |              |          |
| KG_IS10_                | 404 / 3424     | 5165.5 / 4287.5 | 945 / 3906      | 210 / 2716   | 226 / 3014  | 242.5 / 2997.5 | 426 / 3060   |                |              |          |
| KG_IS11_                | 424 / 1991     | 4786.5 / 2353.5 | 1008.5 / 2231.5 | 171 / 1540   | 232 / 1721  | 239.5 / 1713.5 | 410 / 1735   | 5328 / 2928    |              |          |
| KG_IS12_                | 156.5 / 194.5  | 2561 / 365      | 418 / 285       | 42 / 78      | 61 / 129    | 61 / 129       | 123 / 130    | 3111.5 / 543.5 | 1769 / 509   |          |
| U (top / left)          | KG_IS1_        | KG_IS2_         | KG_IS3_         | KG_IS5_      | KG_IS6_     | KG_IS7_        | KG_IS10_     | KG_IS11_       | KG_IS12_     | KG_IS13_ |
| KG_IS1_                 | 705.5 / 190.5  |                 |                 |              |             |                |              |                |              |          |
| KG_IS2_                 | 204.5 / 145.5  | 364.5 / 1235.5  |                 |              |             |                |              |                |              |          |
| KG_IS3_                 | 41 / 1         | 151 / 41        | 72 / 3          |              |             |                |              |                |              |          |
| KG_IS5_                 | 60.5 / 37.5    | 139 / 309       | 92.5 / 82.5     | 2 / 19       |             |                |              |                |              |          |
| KG_IS6_                 | 63 / 35        | 123 / 325       | 97 / 78         | 1 / 20       | 24 / 25     |                |              |                |              |          |
| KG_IS7_                 | 98 / 42        | 261 / 379       | 150 / 100       | 3 / 27       | 42 / 28     | 38 / 32        |              |                |              |          |
| KG_IS10_                | 723 / 299      | 1586.5 / 3085.5 | 1205 / 620      | 15 / 204     | 313 / 198   | 296.5 / 214.5  | 359 / 371    |                |              |          |
| KG_IS11_                | 451 / 319      | 813.5 / 2706.5  | 691.5 / 683.5   | 0 / 165      | 181 / 204   | 173.5 / 211.5  | 195 / 355    | 1388 / 2627    |              |          |
| KG_IS12_                | 116.5 / 51.5   | 287 / 481       | 207 / 93        | 0 / 36       | 51 / 33     | 51 / 33        | 52 / 68      | 465.5 / 410.5  | 431 / 229    |          |
| z                       | KG_IS1_        | KG_IS2_         | KG_IS3_         | KG_IS5_      | KG_IS6_     | KG_IS7_        | KG_IS10_     | KG_IS11_       | KG_IS12_     | KG_IS13_ |
| KG_IS1_                 |                |                 |                 |              |             |                |              |                |              |          |
| KG_IS2_                 | 3.35           |                 |                 |              |             |                |              |                |              |          |
| KG_IS3_                 | 0.86           | 3.98            |                 |              |             |                |              |                |              |          |
| KG_IS5_                 | 2.52           | 1.67            | 2.56            |              |             |                |              |                |              |          |
| KG_IS6_                 | 0.86           | 1.64            | 0.23            | 1.94         |             |                |              |                |              |          |
| KG_IS7_                 | 1.04           | 1.95            | 0.43            | 2.17         | 0.06        |                |              |                |              |          |
| KG_IS10_                | 1.64           | 0.93            | 0.31            | 2.03         | 0.68        | 0.29           |              |                |              |          |
| KG_IS11_                | 2.45           | 3.23            | 2.98            | 2.52         | 0.98        | 0.70           | 0.08         |                |              |          |
| KG_IS12_                | 0.98           | 5.04            | 0.04            | 2.90         | 0.26        | 0.42           | 1.45         | 2.98           |              |          |
| KG_IS13_                | 1.67           | 1.38            | 1.85            | 2.60         | 0.76        | 0.76           | 0.53         | 0.35           | 1.65         |          |
| ES                      | KG_IS1_        | KG_IS2_         | KG_IS3_         | KG_IS5_      | KG_IS6_     | KG_IS7_        | KG_IS10_     | KG_IS11_       | KG_IS12_     | KG_IS13_ |
| KG_IS1_                 | 0.04           |                 |                 |              |             |                |              |                |              |          |
| KG_IS2_                 | 0.02           | 0.04            |                 |              |             |                |              |                |              |          |
| KG_IS3_                 | 0.15           | 0.02            | 0.09            |              |             |                |              |                |              |          |
| KG_IS5_                 | 0.04           | 0.02            | 0.01            | 0.19         |             |                |              |                |              |          |
| KG_IS6_                 | 0.05           | 0.03            | 0.01            | 0.22         | 0.00        |                |              |                |              |          |
| KG_IS7_                 | 0.07           | 0.01            | 0.03            | 0.16         | 0.04        | 0.02           |              |                |              |          |
| KG_IS10_                | 0.03           | 0.02            | 0.02            | 0.03         | 0.01        | 0.01           | 0.00         |                |              |          |
| KG_IS11_                | 0.01           | 0.04            | 0.00            | 0.05         | 0.00        | 0.01           | 0.02         | 0.02           |              |          |
| KG_IS12_                | 0.06           | 0.02            | 0.05            | 0.17         | 0.04        | 0.04           | 0.02         | 0.00           | 0.02         |          |
| Degree of Association   | KG_IS1_        | KG_IS2_         | KG_IS3_         | KG_IS5_      | KG_IS6_     | KG_IS7_        | KG_IS10_     | KG_IS11_       | KG_IS12_     | KG_IS13_ |
| KG_IS1_                 | small          |                 |                 |              |             |                |              |                |              |          |
| KG_IS2_                 | small          | small           |                 |              |             |                |              |                |              |          |
| KG_IS3_                 | small-medium   | small           | small           |              |             |                |              |                |              |          |
| KG_IS5_                 | small          | small           | small           | small-medium |             |                |              |                |              |          |
| KG_IS6_                 | small          | small           | small           | small-medium | small       |                |              |                |              |          |
| KG_IS7_                 | small          | small           | small           | small-medium | small       | small          |              |                |              |          |
| KG_IS10_                | small          | small           | small           | small-medium | small       | small          | small        |                |              |          |
| KG_IS11_                | small          | small           | small           | small        | small       | small          | small        | small          |              |          |
| KG_IS12_                | small          | small           | small           | small        | small       | small          | small        | small          | small        |          |
| KG_IS13_                | small          | small           | small           | small-medium | small       | small          | small        | small          | small        | small    |
| Significantly Different | KG_IS1_        | KG_IS2_         | KG_IS3_         | KG_IS5_      | KG_IS6_     | KG_IS7_        | KG_IS10_     | KG_IS11_       | KG_IS12_     | KG_IS13_ |
| KG_IS1_                 |                |                 |                 |              |             |                |              |                |              |          |
| KG_IS2_                 | YES            |                 |                 |              |             |                |              |                |              |          |
| KG_IS3_                 | NO             | YES             |                 |              |             |                |              |                |              |          |
| KG_IS5_                 | YES            | NO              | YES             |              |             |                |              |                |              |          |
| KG_IS6_                 | NO             | NO              | NO              | NO           |             |                |              |                |              |          |
| KG_IS7_                 | NO             | NO              | NO              | YES          | NO          |                |              |                |              |          |
| KG_IS10_                | NO             | NO              | NO              | YES          | NO          | NO             |              |                |              |          |
| KG_IS11_                | YES            | YES             | YES             | YES          | NO          | NO             | NO           |                |              |          |
| KG_IS12_                | NO             | YES             | NO              | YES          | NO          | NO             | NO           | YES            |              |          |
| KG_IS13_                | NO             | NO              | NO              | YES          | NO          | NO             | NO           | NO             | NO           |          |





# Kougarok Intensive Station Mann Whitney U-Test Results

## Zinc

| n= (top / left / total) | KG_IS1_      | KG_IS2_         | KG_IS3_      | KG_IS5_      | KG_IS6_      | KG_IS7_      | KG_IS10_     | KG_IS11_      | KG_IS12_     | KG_IS13_ |
|-------------------------|--------------|-----------------|--------------|--------------|--------------|--------------|--------------|---------------|--------------|----------|
| KG_IS1_                 | 17 / 64 / 81 |                 |              |              |              |              |              |               |              |          |
| KG_IS2_                 | 17 / 25 / 42 | 64 / 25 / 89    |              |              |              |              |              |               |              |          |
| KG_IS3_                 | 17 / 3 / 20  | 64 / 3 / 67     | 25 / 3 / 28  |              |              |              |              |               |              |          |
| KG_IS5_                 | 17 / 7 / 24  | 64 / 7 / 71     | 25 / 7 / 32  |              |              |              |              |               |              |          |
| KG_IS6_                 | 17 / 7 / 24  | 64 / 7 / 71     | 25 / 7 / 32  | 3 / 7 / 10   | 7 / 7 / 14   |              |              |               |              |          |
| KG_IS7_                 | 17 / 10 / 27 | 64 / 10 / 74    | 25 / 10 / 35 | 3 / 10 / 13  | 7 / 10 / 17  | 7 / 10 / 17  |              |               |              |          |
| KG_IS10_                | 17 / 73 / 90 | 64 / 73 / 137   | 25 / 73 / 98 | 3 / 73 / 76  | 7 / 73 / 80  | 7 / 73 / 80  | 10 / 73 / 83 |               |              |          |
| KG_IS11_                | 17 / 54 / 71 | 64 / 54 / 118   | 25 / 54 / 79 | 3 / 54 / 57  | 7 / 54 / 61  | 7 / 54 / 61  | 10 / 54 / 64 | 73 / 54 / 127 |              |          |
| KG_IS12_                | 17 / 12 / 29 | 64 / 12 / 76    | 25 / 12 / 37 | 3 / 12 / 15  | 7 / 12 / 19  | 7 / 12 / 19  | 10 / 12 / 22 | 73 / 12 / 85  | 54 / 12 / 66 |          |
| KG_IS13_                |              |                 |              |              |              |              |              |               |              |          |
| Σ[Rank] (top / left)    | KG_IS1_      | KG_IS2_         | KG_IS3_      | KG_IS5_      | KG_IS6_      | KG_IS7_      | KG_IS10_     | KG_IS11_      | KG_IS12_     | KG_IS13_ |
| KG_IS1_                 | 769 / 2552   |                 |              |              |              |              |              |               |              |          |
| KG_IS2_                 | 306 / 597    | 2599.5 / 1405.5 |              |              |              |              |              |               |              |          |
| KG_IS3_                 | 184 / 26     | 2185 / 93       | 379 / 27     |              |              |              |              |               |              |          |
| KG_IS5_                 | 231 / 69     | 2341 / 215      | 454 / 74     | 16 / 39      |              |              |              |               |              |          |
| KG_IS6_                 | 245 / 55     | 2380 / 176      | 464 / 64     | 21 / 34      | 59 / 46      |              |              |               |              |          |
| KG_IS7_                 | 190 / 188    | 2223 / 552      | 446 / 184    | 9 / 82       | 33 / 120     | 30 / 123     |              |               |              |          |
| KG_IS10_                | 580 / 3515   | 3537 / 5916     | 1313 / 3538  | 43 / 2883    | 115 / 3125   | 94 / 3146    | 489 / 2997   |               |              |          |
| KG_IS11_                | 366 / 2190   | 2789 / 4232     | 910 / 2250   | 22 / 1631    | 59 / 1832    | 52 / 1839    | 288 / 1792   | 4063 / 4065   |              |          |
| KG_IS12_                | 204 / 231    | 2249 / 677      | 471 / 232    | 8 / 112      | 33 / 157     | 32 / 158     | 113 / 140    | 3036 / 619    | 1847 / 364   |          |
| KG_IS13_                |              |                 |              |              |              |              |              |               |              |          |
| U (top / left)          | KG_IS1_      | KG_IS2_         | KG_IS3_      | KG_IS5_      | KG_IS6_      | KG_IS7_      | KG_IS10_     | KG_IS11_      | KG_IS12_     | KG_IS13_ |
| KG_IS1_                 | 472 / 616    |                 |              |              |              |              |              |               |              |          |
| KG_IS2_                 | 272 / 153    | 1080.5 / 519.5  |              |              |              |              |              |               |              |          |
| KG_IS3_                 | 20 / 31      | 87 / 105        | 21 / 54      |              |              |              |              |               |              |          |
| KG_IS5_                 | 41 / 78      | 187 / 261       | 46 / 129     | 11 / 10      |              |              |              |               |              |          |
| KG_IS6_                 | 27 / 92      | 148 / 300       | 36 / 139     | 6 / 15       | 18 / 31      |              |              |               |              |          |
| KG_IS7_                 | 133 / 37     | 497 / 143       | 129 / 121    | 27 / 3       | 65 / 5       | 68 / 2       |              |               |              |          |
| KG_IS10_                | 814 / 427    | 3215 / 1457     | 837 / 988    | 182 / 37     | 424 / 87     | 445 / 66     | 296 / 434    |               |              |          |
| KG_IS11_                | 705 / 213    | 2747 / 709      | 765 / 585    | 146 / 16     | 347 / 31     | 354 / 24     | 307 / 233    | 2580 / 1362   |              |          |
| KG_IS12_                | 153 / 51     | 599 / 169       | 154 / 146    | 34 / 2       | 79 / 5       | 80 / 4       | 62 / 58      | 541 / 335     | 286 / 362    |          |
| KG_IS13_                |              |                 |              |              |              |              |              |               |              |          |
| z                       | KG_IS1_      | KG_IS2_         | KG_IS3_      | KG_IS5_      | KG_IS6_      | KG_IS7_      | KG_IS10_     | KG_IS11_      | KG_IS12_     | KG_IS13_ |
| KG_IS1_                 | 0.84         |                 |              |              |              |              |              |               |              |          |
| KG_IS2_                 | 1.52         | 2.56            |              |              |              |              |              |               |              |          |
| KG_IS3_                 | 0.58         | 0.27            | 1.23         |              |              |              |              |               |              |          |
| KG_IS5_                 | 1.17         | 0.71            | 1.89         | 0.11         |              |              |              |               |              |          |
| KG_IS6_                 | 2.06         | 1.47            | 2.35         | 1.03         | 0.83         |              |              |               |              |          |
| KG_IS7_                 | 2.41         | 2.80            | 0.15         | 2.03         | 2.93         | 3.22         |              |               |              |          |
| KG_IS10_                | 1.99         | 3.79            | 0.62         | 1.93         | 2.87         | 3.23         | 0.97         |               |              |          |
| KG_IS11_                | 3.31         | 5.50            | 0.95         | 2.32         | 3.58         | 3.73         | 0.68         | 2.97          |              |          |
| KG_IS12_                | 2.26         | 3.06            | 0.13         | 2.31         | 3.13         | 3.21         | 0.13         | 1.30          | 0.63         |          |
| KG_IS13_                |              |                 |              |              |              |              |              |               |              |          |
| ES                      | KG_IS1_      | KG_IS2_         | KG_IS3_      | KG_IS5_      | KG_IS6_      | KG_IS7_      | KG_IS10_     | KG_IS11_      | KG_IS12_     | KG_IS13_ |
| KG_IS1_                 | 0.01         |                 |              |              |              |              |              |               |              |          |
| KG_IS2_                 | 0.04         | 0.03            |              |              |              |              |              |               |              |          |
| KG_IS3_                 | 0.03         | 0.00            | 0.04         |              |              |              |              |               |              |          |
| KG_IS5_                 | 0.05         | 0.01            | 0.06         | 0.01         |              |              |              |               |              |          |
| KG_IS6_                 | 0.09         | 0.02            | 0.07         | 0.10         | 0.06         |              |              |               |              |          |
| KG_IS7_                 | 0.09         | 0.04            | 0.00         | 0.16         | 0.17         | 0.19         |              |               |              |          |
| KG_IS10_                | 0.02         | 0.03            | 0.01         | 0.03         | 0.04         | 0.04         | 0.01         |               |              |          |
| KG_IS11_                | 0.05         | 0.05            | 0.01         | 0.04         | 0.06         | 0.06         | 0.01         | 0.02          |              |          |
| KG_IS12_                | 0.08         | 0.04            | 0.00         | 0.15         | 0.16         | 0.17         | 0.01         | 0.02          | 0.01         |          |
| KG_IS13_                |              |                 |              |              |              |              |              |               |              |          |
| Degree of Association   | KG_IS1_      | KG_IS2_         | KG_IS3_      | KG_IS5_      | KG_IS6_      | KG_IS7_      | KG_IS10_     | KG_IS11_      | KG_IS12_     | KG_IS13_ |
| KG_IS1_                 | small        |                 |              |              |              |              |              |               |              |          |
| KG_IS2_                 | small        | small           |              |              |              |              |              |               |              |          |
| KG_IS3_                 | small        | small           | small        |              |              |              |              |               |              |          |
| KG_IS5_                 | small        | small           | small        | small        |              |              |              |               |              |          |
| KG_IS6_                 | small        | small           | small        | small-medium | small        |              |              |               |              |          |
| KG_IS7_                 | small        | small           | small        | small-medium | small-medium | small-medium |              |               |              |          |
| KG_IS10_                | small        | small           | small        | small        | small        | small        | small        |               |              |          |
| KG_IS11_                | small        | small           | small        | small        | small        | small        | small        | small         |              |          |
| KG_IS12_                | small        | small           | small        | small        | small        | small        | small        | small         | small        |          |
| KG_IS13_                | small        | small           | small        | small-medium | small-medium | small-medium | small        | small         | small        | small    |
| Significantly Different | KG_IS1_      | KG_IS2_         | KG_IS3_      | KG_IS5_      | KG_IS6_      | KG_IS7_      | KG_IS10_     | KG_IS11_      | KG_IS12_     | KG_IS13_ |
| KG_IS1_                 | NO           |                 |              |              |              |              |              |               |              |          |
| KG_IS2_                 | NO           | YES             |              |              |              |              |              |               |              |          |
| KG_IS3_                 | NO           | NO              | NO           |              |              |              |              |               |              |          |
| KG_IS5_                 | NO           | NO              | NO           | NO           |              |              |              |               |              |          |
| KG_IS6_                 | YES          | NO              | YES          | NO           | NO           |              |              |               |              |          |
| KG_IS7_                 | YES          | YES             | NO           | YES          | YES          | YES          |              |               |              |          |
| KG_IS10_                | YES          | YES             | NO           | NO           | YES          | YES          | NO           |               |              |          |
| KG_IS11_                | YES          | YES             | NO           | YES          | YES          | YES          | NO           | YES           |              |          |
| KG_IS12_                | YES          | YES             | NO           | YES          | YES          | YES          | NO           | YES           | NO           |          |
| KG_IS13_                | YES          | YES             | NO           | YES          | YES          | YES          | NO           | NO            | NO           |          |
